# Supplementary material for: Genome mining unearths a hybrid nonribosomal peptide synthetase-like-pteridine synthase biosynthetic gene cluster
Source: eLife. 2017 Mar 15;6:e25229. doi: 10.7554/eLife.25229 (PMC5384830; doi:10.7554/eLife.25229)
Supplement: Figure 8—source data 1. — Intensities from label-free quantification calculated using MaxQuant, averaged for biological triplicate samples, then log2 transformed. Proteins presented exhibited ≥2 fold increased average intensity in WT compared with WTΔlocus. Two-tailed t-test performed using a cutoff of FDR = 0.01 and 2-fold signal difference, or p<0.05. DOI: http://dx.doi.org/10.7554/eLife.25229.029 [file elife-25229-fig8-data1.xlsx]

## Sheet: Sheet1
Uniprot ID	Gene ID	WT (log2intensity)	WTΔ (log2intensity)	Fold change (raw intensity)	Significance (FDR=0.01 S0=2)	Significance (P<0.05)
Q7N0K8	plu3874	27.3283	25.548	3.43512
Q7N421	plu2534	29.2722	27.6059	3.17408
Q7MZP1	plu4240	25.844	24.2097	3.10448
Q7MZ84	tatA	29.0874	27.6736	2.66436
Q7N573	luxE	25.052	23.7042	2.54518
Q7MZ49	plu4452	27.8885	26.5468	2.53441
Q7N9W6	glpD	26.2753	24.9767	2.45987
Q7N185	argP	27.2606	26.0879	2.25424
Q7N5Y0	plu1799	28.754	27.5891	2.24218
Q7N656	plu1712	26.8737	25.7187	2.22687
Q7N7U4	plu1007	29.402	28.2886	2.16359
Q7MZA1	plu4393	26.836	25.8095	2.03713
Q7N910	plu0549	25.9224	24.9025	2.02778
F5HGM6	cpmA	28.6374	27.6322	2.00722
