# Supplementary material for: Genome mining unearths a hybrid nonribosomal peptide synthetase-like-pteridine synthase biosynthetic gene cluster
Source: eLife. 2017 Mar 15;6:e25229. doi: 10.7554/eLife.25229 (PMC5384830; doi:10.7554/eLife.25229)
Supplement: Figure 8—source data 2. — Intensities from label-free quantification calculated using MaxQuant, averaged for biological triplicate samples, then log2 transformed. Proteins presented exhibited ≥2 fold increased average intensity in WTΔlocus compared with WT. Two-tailed t-test performed using a cutoff of FDR = 0.01 and 2-fold signal difference, or p<0.05. DOI: http://dx.doi.org/10.7554/eLife.25229.030 [file elife-25229-fig8-data2.xlsx]

## Sheet: Sheet1
Uniprot ID	Gene ID	WT (log2intensity)	WTΔ (log2intensity)	Fold change (raw intensity)	Significance (FDR=0.01 S0=2)	Significance (P<0.05)
Q7MAX5	ppc	32.0278	34.1817	4.45017
Q7N5T5	cheW	26.1175	27.9002	3.44077
Q7N2W0	plu2964	25.0997	26.351	2.38066
Q7N352	rplY	29.431	30.5841	2.22394
Q7N376	plu2843	26.9559	28.0658	2.15829
Q7N5Z2	acyP	23.3748	24.4811	2.15299
Q7N653	plu1716	23.5792	24.6653	2.12295
