# Supplementary material for: Genome mining unearths a hybrid nonribosomal peptide synthetase-like-pteridine synthase biosynthetic gene cluster
Source: eLife. 2017 Mar 15;6:e25229. doi: 10.7554/eLife.25229 (PMC5384830; doi:10.7554/eLife.25229)
Supplement: Figure 8—source data 3. — Intensities from label-free quantification calculated using MaxQuant, averaged for biological triplicate samples, then log2 transformed. Proteins presented exhibited ≥2 fold increased average intensity in ΔhexA compared with ΔhexAΔlocus. Two-tailed t-test performed using a cutoff of FDR = 0.01 and 2-fold signal difference, or p<0.05 (+ indicates statistical significance). DOI: http://dx.doi.org/10.7554/eLife.25229.031 [file elife-25229-fig8-data3.xlsx]

## Sheet: non_NaN_output
Uniprot ID	Gene ID	WT-1 (log2intensity)	WT-2 (log2intensity)	WT-3 (log2intensity)	WTΔ-1 (log2intensity)	WTΔ-2 (log2intensity)	WTΔ-3 (log2intensity)	Average fold change (raw intensity)	Significance (FDR=0.01 S0=2)	Significance (P<0.05)
Q7N0K8	plu3874	-	27.3283	-	26.2372	24.8588	-	3.43512
Q7N421	plu2534	-	29.2722	-	27.6059	-	-	3.17408
Q7MZP1	plu4240	-	25.844	-	24.2097	-	-	3.10448
Q7MZ84	tatA	-	-	29.0874	28.4362	-	26.911	2.66437
Q7N573	luxE	25.052	-	-	-	23.7042	-	2.54518
Q7MZ49	plu4452	28.3407	27.6832	27.6415	26.7538	25.1895	27.6972	2.5344
Q7N9W6	glpD	26.1925	25.1651	27.4683	23.3851	25.0022	26.543	2.45988
Q7N185	argP	26.1711	26.4573	29.1533	26.644	26.4666	25.1532	2.25423
Q7N5Y0	plu1799	29.2666	27.7188	29.2766	27.1244	28.6691	26.9738	2.24217
Q7N656	plu1712	26.8737	-	-	25.7187	-	-	2.22687
Q7N7U4	plu1007	-	29.3608	29.4432	27.8964	-	28.6808	2.1636
Q7MZA1	plu4393	27.1512	26.5208	-	26.1565	25.4625	-	2.03713
Q7N910	plu0549	-	-	25.9224	-	-	24.9025	2.02778
F5HGM6	cpmA	28.8596	-	28.4152	28.2642	26.1975	28.435	2.00723
P68682	rpsU	31.1627	30.5731	31.4185	30.5697	28.375	31.2139	1.99804
Q7NA83	asnA	30.19	27.3695	-	27.9749	28.0992	27.2772	1.99447
Q7N4K0	plu2337	-	27.7204	-	26.7249	-	-	1.99377
Q7N366	plu2855	-	25.2843	-	-	-	24.3628	1.89404
Q7N3I4	plu2732	27.578	-	-	26.658	-	-	1.89206
Q7N2U5	plu2979	-	25.9399	-	25.7751	-	24.2996	1.86934
Q7NA95	atpC	27.1818	28.3594	-	26.6942	-	27.0447	1.86757
Q7N9E3	prkB	-	26.7093	-	25.8101	-	-	1.86503
Q7MYN4	plu4641	27.4166	-	-	26.8653	26.2571	-	1.80924
Q7N7D2	plu1218	27.932	26.4281	26.8552	26.2365	25.616	26.8405	1.79103
Q7N9F0	plu0389	-	27.2397	-	-	-	26.4225	1.762
Q7N799	rimM	26.4273	-	-	25.6199	-	25.609	1.75668
Q7N9Y7	plu0164	-	25.458	-	-	-	24.6514	1.74919
Q7N3I5	plu2731	25.4048	-	-	-	24.6042	-	1.74177
Q7N1Y8	plu3326	26.2915	-	-	25.5137	-	-	1.71447
Q7N0K4	cyoD	-	28.3723	26.0628	-	-	26.4401	1.71412
Q7N786	plu1272	25.9842	25.5851	26.0499	25.0679	25.1584	-	1.6934		+
Q7MYU7	rpsF	31.4823	31.0506	31.3456	30.3004	30.6532	30.6513	1.69096		+
Q7N228	hscA	27.8916	26.9064	27.0104	27.0956	25.6334	26.8169	1.68668
Q7N7B1	proA	28.3291	27.8201	28.2191	28.5014	25.3765	28.258	1.67493
Q7N9U7	pstS	27.5926	28.3196	28.2959	26.9292	27.6961	27.4058	1.65366
Q7N496	plu2456	26.162	26.56	-	-	25.5935	25.6968	1.64243
Q7N5P9	flhA	25.1242	-	-	-	-	24.4172	1.63237
Q7MYC3	ftsN	25.6524	-	-	24.9371	24.9539	-	1.63221
Q7N973	plu0474	28.0122	26.2382	26.6088	25.7866	27.1182	25.8393	1.6302
Q7N4J8	plu2339	-	27.2267	26.2929	26.3727	25.9506	25.8533	1.62558
Q7N516	hslJ	29.7145	31.0252	30.3235	28.8641	29.9348	30.1827	1.61759
Q7N476	ompW	-	29.6831	-	29.2799	-	28.704	1.61459
Q7N8P0	ecfE	26.4745	-	-	25.9131	-	25.6859	1.59658
Q7MB87	plu0643	-	25.9706	25.9054	25.4048	24.9421	25.509	1.57211
Q7N6S7	plu1464	29.841	29.9279	29.0186	28.4427	28.7708	29.6639	1.55482
Q7N972	plu0475	26.829	-	-	-	-	26.2072	1.53884
Q7N9X1	plu0180	25.1246	-	-	24.5059	-	-	1.53551
Q7N7H5	plu1174	31.5321	32.1211	32.0504	31.2275	31.214	31.4111	1.53373		+
Q7N5Q2	plu1893	25.8566	26.8507	-	25.4911	26.0302	-	1.50835
Q7MB38	plu2222	28.5253	26.1011	25.8154	26.2179	27.07	25.3751	1.50831
Q7MYD3	plu4748	27.9246	28.5455	-	27.8786	27.4151	-	1.50339
Q7N550	plu2109	28.7561	-	-	28.3533	28.2902	27.9036	1.48832
F5HC75	cpmC	30.0239	29.1698	29.6306	29.6162	28.0399	29.4601	1.48385
Q7N5N7	plu1911	26.5059	-	26.7733	-	-	26.0735	1.48047
Q7N9M2	dppA	28.3822	28.5007	29.1046	28.4272	26.9744	28.9358	1.4641
Q7N3R6	plu2649	27.4904	27.3911	-	27.1625	26.6245	-	1.46131
Q7N8N6	fabZ	-	27.1285	-	27.4687	-	25.6952	1.46056
Q7N2W6	plu2958	27.0508	27.971	-	27.4309	26.4982	-	1.46043
Q7N8I6	plu0736	25.5284	-	-	24.9828	-	-	1.45966
Q7N3G5	hda	27.9596	-	28.0124	27.5807	-	27.3179	1.45062
Q7N3W5	pdxH	26.7848	-	26.9474	26.0441	26.4621	26.4967	1.44571
Q7N541	plu2119	26.4645	26.3409	26.5215	26.0362	-	25.7861	1.44505		+
Q7MY37	coaD	-	26.256	-	25.9464	-	25.5261	1.43371
Q7N0B1	plu3982	-	-	25.8158	-	-	25.299	1.43078
Q7N3B4	hflD	-	-	26.5503	26.0342	-	-	1.43014
Q7N969	plu0479	26.0223	-	-	25.5184	-	-	1.4181
Q7MZN4	osmY	-	-	26.4776	-	-	25.9737	1.41803
Q7N6J3	dcd	26.9337	-	-	26.358	-	26.5024	1.41765
Q7N6R0	plu1482	-	-	26.1673	-	-	25.67	1.41154
Q7MYL6	wzzE	26.367	-	-	25.6561	26.0878	-	1.40938
Q7MY05	plu4894	25.7224	26.5037	25.3866	24.9391	26.2466	24.948	1.40737
Q7N373	plu2846	-	-	26.0249	-	25.3143	25.7513	1.40645
Q7MYD9	argH	29.9715	30.2412	30.3369	29.4992	29.5165	30.0758	1.40056
Q7N085	arcB	26.3847	25.9106	26.0314	25.8574	25.3424	25.6815	1.39648
Q7N3Q6	arnC	26.3734	25.8089	26.6814	25.7468	25.6794	25.9956	1.39537
Q7N9U2	plu0219	28.7251	29.98	29.5171	28.8827	28.3539	29.5518	1.39274
Q7N4C1	pyrF	26.9947	-	26.5503	26.1586	-	26.4375	1.3894
Q7N416	plu2539	30.3488	-	30.3718	29.4394	29.9299	30.2929	1.38791
Q7MY39	kdtA	-	-	25.2434	-	-	24.7706	1.38778
Q7MYT4	plu4588	-	26.8355	26.2847	-	-	26.0908	1.38438
Q7N5M3	flgL	26.6146	-	25.9396	26.876	25.1649	25.3829	1.38429
Q7N4I4	plu2353	27.9404	-	27.9629	27.3215	27.4257	27.7011	1.38406		+
Q7N4T5	plu2232	27.21	-	27.9476	26.6859	-	27.5351	1.38349
Q7N3Y4	mppA	-	26.412	-	26.2144	25.6424	25.9772	1.38251
Q7N9B4	rpsL	31.7487	-	30.931	-	31.1325	30.6151	1.38135
Q7N4V6	mhpB	31.1725	30.2492	31.2836	29.9379	30.422	30.9509	1.38014
Q7N562	plu2095	27.8016	-	28.3635	27.2782	-	27.96	1.37881
Q7MYJ0	plu4687	29.4206	29.1958	29.0621	28.7553	28.4265	29.1106	1.37751
Q7MZY8	glpT	-	-	26.0514	24.9609	25.8105	26.0104	1.37317
Q7N6B7	mukB	26.5495	-	26.853	26.0036	-	26.49	1.37027
Q7N3W4	anmK	27.2723	27.1398	25.9357	27.0157	27.1486	24.8344	1.36578
Q7N0P7	fepE	28.3834	27.8166	28.4739	27.8056	27.5765	27.9477	1.36418
Q7MY54	gpsA	28.4755	28.2698	27.4259	28.5758	27.1262	27.1371	1.3604
Q7N314	plu2909	-	28.322	-	28.0979	-	27.6593	1.35981
Q7MZP4	plu4237	28.0446	-	28.1976	27.8836	26.9753	28.1769	1.35899
P63875	csrA	29.3361	28.6977	29.2492	28.816	28.9498	28.1988	1.3561
Q7N604	plu1773	-	-	25.2352	24.796	-	24.7965	1.35565
Q7N062	plu4034	-	26.2466	26.2206	26.2192	25.4136	25.757	1.35383
Q7MZT5	plu4189	29.5422	29.2518	29.572	29.0369	28.6451	29.3743	1.35338
Q7MYV0	plu4568	28.9604	30.989	31.1745	29.9848	29.0304	30.8048	1.35158
Q7N5K0	fliF	29.0128	27.6234	27.5107	28.0276	27.7155	27.1007	1.35132
Q7N5W4	dinI	24.622	-	-	-	-	24.1886	1.35047
Q7MZM6	phoA	28.7755	28.6899	29.2659	27.8813	28.5036	29.049	1.34955
Q7N2W1	plu2963	-	24.8441	-	24.4194	-	-	1.34223
Q7N522	minC	25.5503	-	25.7401	25.2208	-	-	1.34201
Q7N6L3	plu1537	32.4798	33.1483	33.0829	31.9124	32.8201	32.7193	1.33767
Q7N748	ybeY	-	-	25.6332	-	-	25.2143	1.33691
Q7MZV8	plu4163	26.5289	-	-	26.0054	26.342	25.9952	1.33306
Q7MYU0	hfq	-	28.4966	-	28.0832	-	-	1.33186
Q7MZI1	plu4306	25.3708	-	-	25.3327	-	24.592	1.32724
Q7N985	malE	30.3789	30.3706	30.2924	29.7512	30.2757	29.7905	1.32696
Q7N911	plu0548	26.7893	26.4315	28.023	26.7665	26.1115	27.1508	1.32408
Q7MYD6	argC	-	-	27.5342	-	-	27.1293	1.32404
Q7N994	plu0449	25.181	24.9777	-	24.6763	-	-	1.32234
P60005	uspE	-	27.6189	27.6205	27.4349	27.2921	26.9298	1.32019
Q7MZ21	plu4487	-	-	25.9475	-	25.699	25.3975	1.31884
Q7N5P2	plu1905	28.2823	28.5296	28.8331	28.6889	27.4215	28.3475	1.31557
Q7N5E1	plu2011	-	-	26.5792	-	-	26.1846	1.31454
Q7N461	oppA2	31.4573	31.7335	31.7135	30.9712	31.4453	31.3138	1.31166
Q7MYE6	birA	24.7294	-	-	24.3401	-	-	1.30978
Q7N995	plu0448	29.0018	27.8068	28.9068	27.7823	28.0478	28.7197	1.3091
Q7N6L6	plu1533	26.5888	26.9764	27.2557	26.8937	-	26.2113	1.30842
Q7N383	plsX	-	25.735	26.2277	-	-	25.5938	1.3082
Q7N3B0	plu2809	29.055	29.0569	29.3197	28.5249	28.5317	29.2153	1.30727
Q7MYM2	wecE	26.5763	26.3768	-	26.0341	25.9684	26.2709	1.3062
Q7N4B6	plu2433	27.1703	28.1384	-	-	-	27.2708	1.30455
Q7N5I6	plu1962	29.7599	27.4629	27.922	28.4697	27.6792	27.8495	1.30326
Q7N4T9	bioD	27.2614	27.036	-	26.72	27.2255	26.3727	1.29769
Q7N524	minE	-	-	26.3391	-	26.0555	25.8734	1.2965
Q7N5T7	motB	26.8873	-	25.8663	26.166	25.8855	25.9593	1.29518
Q7N0Y2	plu3747	27.4988	27.8448	28.1534	27.3161	27.5856	27.4791	1.29423
Q7N0C7	plu3964	28.8259	-	28.483	27.883	28.8023	28.1655	1.29312
Q7N8L0	cysN	26.6806	26.9144	26.297	-	-	26.2684	1.28546
Q7N101	abgR	-	-	24.8342	24.473	-	-	1.28455
Q7N387	acpP	-	-	30.1939	-	-	29.8327	1.2845
Q7N557	cutC	26.1602	25.8803	24.9634	25.3565	25.3152	25.2545	1.28271
Q7N6S8	plu1463	28.861	29.505	28.4934	28.3616	28.9343	28.4891	1.28172
Q7N385	fabD	30.4569	30.2584	30.4221	30.0825	29.883	30.1076	1.27879		+
Q7N4V7	hcaB	31.1991	30.3939	31.3038	30.1606	30.4515	31.2218	1.27837
Q7N2B7	dedD	-	-	25.6884	25.5033	-	25.1668	1.27751
Q7N4T1	plu2236	28.4913	28.0959	-	27.9414	-	-	1.27645
Q7N8K1	rpoS	27.5147	28.0799	28.2443	27.7594	27.0117	28.0123	1.2762
Q7N3T3	aroH	26.6468	25.9598	-	25.9519	-	-	1.27578
Q7N576	luxD	26.4483	27.3855	26.0873	27.2601	25.5476	26.0802	1.26961
Q7N6Y5	zipA	-	26.6058	26.7936	-	26.2219	26.4921	1.26814
Q7N996	plu0447	26.3105	26.1059	25.7688	25.8681	25.6665	25.6238	1.26774
Q7N368	plu2853	30.9024	32.121	31.7558	31.0423	31.1888	31.5253	1.26656
Q7NA25	gdhA	26.6217	26.6223	26.715	26.3286	25.7064	26.9039	1.26576
P60110	hutG	29.507	28.5882	28.6841	28.7691	28.3355	28.6548	1.26575
Q7N6L9	plu1530	27.0864	26.9861	-	26.4686	26.9288	-	1.26361
Q7N690	plu1672	24.6928	-	-	-	-	24.3569	1.26213
Q7N9G4	plu0372	28.543	-	28.1999	28.2498	27.6389	28.2187	1.26193
Q7N8X5	nhaR	26.7762	-	26.6533	25.8263	26.6542	26.6632	1.2601
Q7MZV5	tccA1	24.9805	26.3371	25.8925	24.7957	25.6353	25.7789	1.25998
Q7N4W1	hcaR	25.7764	-	26.2552	25.4538	25.8276	25.7808	1.2556
Q7N201	nadE	27.8192	27.6099	27.7431	27.6385	27.1547	-	1.25482
Q7N291	hutI	29.8853	30.1645	30.4512	29.7455	29.1463	30.6449	1.24958
Q7N8Z4	thrC	29.493	29.6147	29.6322	29.1079	29.1927	29.4871	1.2461
Q7MZB1	dltD	25.3923	-	25.0827	-	-	24.9208	1.24554
Q7N6Z5	cysP	-	26.3839	26.174	-	-	25.9622	1.2455
Q7N2W5	plu2959	27.1704	27.2492	-	26.6557	27.0971	26.9276	1.24517
Q7MB50	plu1713	27.6597	26.488	26.871	26.0528	27.1018	26.918	1.24433
Q7MB81	plu0762	-	-	25.1843	24.8689	-	-	1.24432
Q7N9N8	plu0279	29.7854	29.5784	29.7091	28.8545	29.4086	29.8653	1.24385
Q7MAX3	dut	27.1435	27.4639	27.7471	27.0926	27.1822	-	1.24319
Q7N9B9	fkpA	30.6703	31.011	31.2044	30.4408	30.8501	30.6602	1.24104
Q7MYC6	rpmE	30.0447	29.9449	30.2759	28.9091	29.8573	30.5769	1.23746
Q7N607	rmf	27.8813	27.0999	27.4623	26.6123	27.7947	27.1151	1.23723
Q7N861	plu0884	-	26.2065	26.39	26.1465	-	25.8367	1.23681
Q7N0A3	fadH	26.2723	26.169	26.3267	26.4288	25.3081	26.1264	1.23246
Q7MY55	cysE	29.2203	28.8407	29.0454	29.4411	27.6305	29.1301	1.23245
Q7MZ89	ubiD	25.6542	-	26.1184	25.0388	25.6976	26.0201	1.23188
Q7N4G3	plu2375	27.6555	26.9753	26.8214	26.684	26.8184	27.0521	1.2305
Q7MY10	fdoH	-	-	25.4678	-	-	25.1689	1.23024
Q7MYU1	hflX	26.2237	25.7766	26.1353	-	26.0527	25.4423	1.22916
Q7N8N5	lpxA	29.4626	29.0813	29.2879	28.7886	29.037	29.1261	1.22547
Q7N4W6	plu2198	-	-	25.563	-	-	25.2708	1.22449
Q7N0P0	dnaX	25.2167	-	-	24.9957	-	24.8542	1.22415
Q7MZB4	pgi	29.4799	29.758	29.2115	29.2146	29.0367	29.3244	1.22372
Q7N9A7	rplA	31.4673	29.2078	31.6442	30.6636	30.3008	30.4816	1.22356
Q7N958	plu0491	-	27.2847	26.2538	25.7914	26.9712	26.6748	1.22276
Q7N2P0	plu3036	26.8069	27.1175	26.461	26.7516	27.0134	25.7506	1.22259
Q7M7E6	plu1127	26.1541	-	-	-	25.8648	-	1.22201
Q7NA77	rbsB	27.8185	28.2877	28.1983	27.6124	27.665	28.1595	1.22197
Q7N7R5	plu1043	-	-	24.8905	-	-	24.6045	1.21922
Q7N8F9	plu0767	28.3348	-	28.3022	27.4129	28.4568	28.2285	1.21908
Q7N2K1	plu3075	28.1084	28.9703	28.542	28.2939	28.3059	28.1654	1.21855
Q7N4V9	hcaF	29.5303	28.9104	29.5203	28.9141	28.9115	29.2827	1.21776
Q7N3F8	upp	29.3667	29.3076	29.6616	29.1573	28.8747	29.4542	1.21693
Q7N6R8	modF	26.9023	-	25.7893	26.4228	-	25.7077	1.2147
Q7N561	plu2096	27.4821	28.7836	-	28.3873	27.3184	-	1.2142
Q7N0I7	nrdR	26.1002	26.73	-	-	26.673	25.599	1.21344
Q7MYF8	rplP	31.3147	31.3217	31.2881	31.1041	30.9688	31.0184	1.21226		+
Q7N9E5	argD	26.7655	27.3274	27.1208	26.7662	26.192	27.4229	1.21211
Q7N8U4	thyA	26.0341	-	-	-	26.0129	25.5021	1.21138
Q7MZH9	plu4308	27.7574	27.5823	27.2227	27.7931	26.5052	27.4343	1.21137
Q7N2J0	nuoE	30.1642	29.0877	29.7589	28.6809	29.9319	29.5701	1.21083
Q8KM02	slyA	31.4633	30.8327	31.1865	31.2308	30.2894	31.1367	1.21014
Q7MY47	kbl	31.432	31.2426	31.6181	31.0277	31.0459	31.403	1.2075
Q7N7U1	plu1011	26.3664	25.6024	26.3072	25.5987	26.0758	25.7979	1.20401
Q7NAC1	plu0013	29.5427	-	29.2685	28.6388	29.6374	-	1.20372
Q7N5A7	plu2049	28.7488	28.6529	29.2892	28.5023	28.8067	28.5821	1.20295
Q7N8K2	nlpD	26.0839	26.6249	26.4784	26.2553	-	26.0077	1.201
Q7NA49	nudE	26.3715	-	26.0214	25.6294	26.1383	26.0322	1.20012
Q7N6I9	plu1561	33.3107	33.541	33.2746	32.9037	33.1945	33.2412	1.19938
Q7N579	plu2077	25.9517	26.2979	-	-	26.2042	25.5234	1.1983
Q7N5D1	plu2023	27.7723	27.4993	28.014	27.6219	27.5874	27.311	1.19344
Q7MYI6	aroE	-	25.1645	-	24.9107	-	-	1.19233
Q7NA89	atpB	28.6994	28.4494	28.4558	29.043	27.8684	27.9428	1.18932
Q7N103	abgB	28.1771	28.7781	28.3743	28.1562	28.0194	28.4036	1.18924
Q7MZY7	glpQ	29.1608	29.9791	30.2201	29.2866	29.3821	29.9467	1.18771
Q7N3N1	plu2684	-	-	27.6818	-	-	27.4348	1.18668
Q7N628	plu1744	29.2294	28.4069	29.274	28.8423	28.24	29.0896	1.18603
Q7N1U4	smpA	28.4825	-	-	28.2375	-	-	1.1851
Q7N4G6	plu2372	-	-	25.1966	-	-	24.9521	1.18466
Q7MYX6	obg	26.93	27.0299	27.3737	26.6353	27.2141	26.7515	1.18445
Q7N4V5	hcaD	28.3755	27.599	28.5492	28.0351	27.7985	27.9578	1.18439
Q7N756	lptE	27.3621	27.3994	27.4228	27.042	27.1351	27.2778	1.18357		+
Q7N0H7	phoB	26.6442	-	25.9102	-	-	26.0343	1.18339
Q7N8B7	afuA	26.3957	-	25.9115	-	25.9032	25.9211	1.18225
Q7N9R9	plu0245	25.4474	25.3874	25.7439	25.3096	25.49	25.055	1.18211
Q7N2A7	tctC	26.8662	26.9954	26.9199	26.6253	26.4124	27.0204	1.18192
Q7MZY6	epmA	26.3127	26.1561	-	25.9659	-	26.0228	1.18105
Q7MZT2	plu4192	26.0861	-	25.2686	25.2606	25.5876	25.464	1.18097
Q7MBA2	spoT	-	-	24.5714	-	-	24.3318	1.18062
Q7N8K6	ispF	26.0159	26.3533	26.2022	26.0147	26.1856	25.6594	1.17872
Q7MYC7	metJ	26.8175	-	26.4847	-	-	26.4147	1.17807
Q7N076	plu4017	28.2592	28.1629	28.9585	27.8473	28.3374	28.4885	1.17759
Q7N0E0	parE	25.9998	25.4991	-	24.9798	25.5902	25.9726	1.1771
Q7N6D8	plu1617	23.6663	-	-	23.4331	-	-	1.17543
Q7N751	gltI	27.444	25.8951	28.4603	27.4102	25.9155	27.7751	1.17519
Q7MZC8	dusA	24.009	-	-	23.7788	-	-	1.17301
Q7N9X9	plu0172	28.034	27.6783	27.9479	27.6703	27.6909	27.61	1.17255
Q7N450	purU	26.8964	27.6312	27.2251	27.0772	27.4041	26.5828	1.17246
Q7N0F8	plu3932	26.5034	26.404	26.7634	26.4791	26.329	26.1745	1.17233
Q7N967	thiH	-	24.9686	-	24.7281	25.2222	24.2709	1.17138
Q7N227	hscB	25.9645	-	26.1126	25.2606	25.8931	26.2788	1.17097
Q7N3Y2	tyrR	28.7736	28.1576	28.1892	28.5411	27.2254	28.6725	1.17049
Q7N4Y2	fnr	27.8444	27.4836	27.4523	27.3103	27.573	27.2159	1.17041
Q7N4T8	plu2228	27.8693	28.3014	28.5874	28.0144	-	28.0407	1.1689
Q7N704	plu1378	28.0987	27.8547	28.2247	27.7041	28.119	27.68	1.16875
Q7N4T7	plu2230	-	26.3513	25.9621	25.9717	-	25.8946	1.1676
Q7MZ90	fre	26.1404	26.6164	-	26.4845	26.1569	25.8243	1.16725
Q7MZ07	plu4504	27.543	-	27.1707	27.4255	27.215	26.7688	1.16508
Q7MZP3	plu4238	26.0078	25.8821	-	26.0077	25.4471	-	1.16275
Q7N4J9	plu2338	28.9338	29.5244	-	29.2196	28.995	28.8239	1.16176
Q7N8W1	carB	31.7032	31.9422	32.1163	31.4857	31.7378	31.8893	1.16173
Q7N7G5	plu1185	25.9962	25.5837	-	25.6769	25.6488	25.4019	1.15996
P60054	plu2870	26.3591	26.9332	26.2487	26.6947	26.0266	26.1788	1.15959
Q7N4I6	plu2351	24.6333	24.9183	-	24.6238	24.5943	24.4728	1.15841
Q7N4B2	plu2437	27.5733	27.7493	27.2415	26.8388	27.7662	27.3232	1.15822
Q7N381	plu2838	26.7573	-	27.1473	26.4946	26.9189	26.8115	1.15723
Q7N163	ampE	28.5404	28.1305	28.422	28.3027	27.763	28.3953	1.15721
Q7N180	plu3615	-	-	27.9807	-	-	27.7703	1.15695
Q7N6D5	aroA	-	-	27.0263	26.9288	26.2631	27.2592	1.15615
Q7N2G7	astC	28.8374	28.3903	27.9976	28.3001	28.1905	28.1129	1.15453
Q7MYF9	rpmC	32.2074	31.33	31.6381	31.4593	31.4712	31.6253	1.15395
Q7N5Z6	plu1781	-	26.9595	26.5011	26.4486	26.4513	26.6721	1.15373
Q7N1Y5	plu3329	27.3997	27.458	27.261	27.3023	27.3036	26.894	1.15371
Q7N1F7	plu3519	25.6666	25.7374	-	25.6063	25.541	25.3435	1.15271
Q7N660	plu1707	24.2999	24.7659	-	24.3289	-	-	1.15189
Q7N1Y7	plu3327	28.7616	28.4928	27.2344	28.5855	28.4436	26.8482	1.15178
Q7N5E2	plu2010	25.8624	27.0326	-	25.7626	26.5071	26.4639	1.15107
Q7N3L9	sdaA	26.6235	-	26.7243	26.3589	-	26.5849	1.15029
Q7N469	tonB	25.0581	-	24.6721	-	24.6635	-	1.14995
Q7NA26	pitA	27.1116	26.875	26.7861	26.5672	-	26.8829	1.14808
Q7N6C8	plu1628	30.5354	29.9728	30.3936	30.4291	29.3238	30.5534	1.14747
Q7N8E1	plu0786	30.1	29.5053	29.1592	29.9614	29.1291	29.0809	1.14684
Q7N9V7	bioH	23.8541	-	-	23.6564	-	-	1.1468
Q7MYQ3	fhuE	29.9157	29.2228	30.3525	29.4647	29.7998	29.6366	1.146
Q7N192	plu3603	26.4222	26.7933	26.4692	26.5015	-	26.2291	1.14573
Q7MB01	tgt	26.4318	25.9204	26.428	25.8776	-	26.2512	1.14524
Q7N6Q9	plu1483	26.1521	-	25.9809	-	-	25.8711	1.14507
Q7N739	plu1323	26.7099	27.3517	-	26.5324	26.8546	27.1199	1.14487
Q7N2A4	fabB	31.2179	31.1871	31.2118	30.4273	31.3432	31.2608	1.14485
Q7N0S4	ppiB	32.1281	30.2147	30.4506	30.689	30.6128	30.9073	1.14454
Q7N9N7	plu0280	31.976	32.2227	32.0302	31.9961	31.5477	32.1027	1.14405
Q7N080	sspA	31.6805	32.0102	31.5483	31.9593	30.9506	31.7472	1.14392
Q7N099	plu3994	36.1418	35.9987	36.4192	35.7551	36.2144	36.0087	1.1438
Q7M7F6	plu0545	24.7595	-	24.4084	-	-	24.3911	1.14304
Q7N7W9	hpaI	27.8398	27.8603	27.808	27.7518	27.4773	27.702	1.14262
Q7N0F6	plu3934	26.6865	26.605	26.8069	26.1169	26.7734	26.6334	1.14198
Q7N6T4	plu1457	27.2509	26.9652	27.3972	27.0484	26.9969	26.9952	1.1415
Q7N7L7	plu1105	27.3574	27.5338	26.6521	27.3756	26.7774	26.8209	1.1406
Q7MB40	msbB	25.1899	-	25.3045	-	25.0214	25.0953	1.13986
Q7N5F1	plu2001	26.0835	-	-	25.8934	-	25.8966	1.13963
Q7MBH3	chb	29.965	31.0684	30.7658	30.142	30.3358	30.7566	1.13939
Q7N5T4	cheD	30.8302	28.1835	29.8457	29.2035	29.3137	29.778	1.13924
Q7N4Z4	plu2166	29.5871	29.5127	30.3038	29.2897	29.7574	29.7937	1.13888
Q7N5I5	plu1964	31.0289	31.1997	31.2363	30.9132	30.9627	31.0306	1.13772
Q7N4I7	plu2350	26.4573	26.1425	27.1265	26.8715	25.6778	26.6197	1.1374
Q7N189	rpiA	29.3828	28.7269	28.6843	28.6277	29.1568	28.4534	1.13709
Q7MZX4	aspA	31.9676	31.6014	31.739	31.7922	31.5043	31.4615	1.13548
Q7MZ85	tatB	25.3891	-	25.378	25.0945	25.0742	25.4329	1.13527
Q7MZ25	valS	29.7277	29.2987	29.6057	29.3833	29.3309	29.3712	1.1346
Q7N3Q2	ihfA	31.5216	31.3905	32.0099	31.0225	31.5654	31.7943	1.13285
Q7N223	iscR	-	25.9941	26.8431	25.7747	-	26.7029	1.13274
Q7MZ16	pyrB	26.8086	26.3317	-	26.0717	26.2367	26.8627	1.13274
Q7N639	plu1731	30.2076	29.8709	30.1109	29.6214	29.7952	30.235	1.1323
Q7N058	lptA	27.1036	26.2938	26.623	26.3857	26.4963	26.6009	1.13222
Q7N6I5	hisF	26.3565	26.0179	26.3329	25.6084	26.1947	26.3691	1.13161
Q7N544	znuA	26.1644	-	26.4914	26.0844	26.3005	26.0649	1.13129
Q7N0B6	tsaD	-	-	25.7445	25.2721	25.8016	25.6267	1.13111
Q7N6V6	sucB	30.9274	30.6743	31.6942	30.6525	31.016	31.0951	1.13087
Q7MZP9	plu4228	29.1027	29.9252	29.6035	30.0651	28.8158	29.2197	1.13048
Q7N3D7	plu2780	25.8981	-	25.1162	25.2416	-	25.4191	1.13037
Q7N004	garK	-	24.956	-	24.7795	-	-	1.13015
Q7MY94	cpxR	26.4575	-	26.2391	25.635	-	26.709	1.12994
Q7MYX8	greA	31.0175	31.0557	31.1066	30.7384	30.8246	31.0928	1.1287
Q7N649	plu1720	26.7264	-	26.1774	26.4909	26.33	26.0114	1.12852
Q7N272	plu3219	31.9169	31.7258	32.2504	31.757	31.9109	31.706	1.12743
Q7N456	hns	33.5977	33.439	33.5231	33.1711	33.5532	33.3188	1.12681
Q7MY66	wblW	25.8788	-	-	25.7963	25.6197	-	1.12573
Q7N6Z0	crr	32.065	31.8001	31.8728	31.4116	31.8811	31.9352	1.12505
Q7MY24	plu4871	27.5065	27.9128	28.0272	27.9146	26.9428	28.0809	1.1246
Q7N9A5	rplL	33.1119	32.8827	32.4525	32.679	33.1043	32.1631	1.12262
Q7N105	plu3721	29.6425	29.2489	29.4857	29.2656	29.1243	29.4886	1.12207
Q7N914	plu0540	27.6728	27.3154	-	26.9968	27.7295	27.2575	1.12206
Q7MZ01	plu4510	-	-	25.6039	-	-	25.438	1.12183
Q7N3Z6	dadA	28.5548	27.8768	28.2394	28.4875	27.4797	28.2076	1.12151
Q7N3F6	purN	25.8215	-	25.4438	25.5114	-	25.4272	1.11988
Q7N139	rsmH	27.3543	-	27.5926	27.2917	27.2372	27.4035	1.11937
Q7N8M2	metN	25.6994	24.8451	-	25.1096	-	-	1.11933
Q7N198	gcvH	31.0851	31.6301	31.3558	31.3043	31.5091	30.7714	1.11892
Q7N9Z4	cipB	28.5199	30.2751	-	29.9597	-	28.5113	1.11882
Q7N6I8	plu1562	26.9743	-	26.3289	26.5027	26.5639	26.4041	1.1184
Q7NA23	opdA	31.1552	31.413	31.2473	30.8182	31.2568	31.2563	1.11839
Q7MZM4	plu4259	26.1755	27.0986	-	26.8601	26.0925	-	1.11789
Q7N1C7	prfB	28.5638	27.7096	27.948	27.4419	28.0813	28.2172	1.11759
Q7N602	ompA	33.4655	33.1498	33.4845	33.1999	33.2797	33.1394	1.11747
Q7NA40	pulA	25.6094	-	25.0824	25.3774	-	24.9947	1.11714
Q7N9R8	plu0246	29.4504	30.037	30.1828	29.6015	29.3407	30.2486	1.11712
Q7N930	deoD	28.4835	28.9931	28.818	28.2981	29.1121	28.405	1.1171
Q7MZP6	plu4232	28.8397	28.0707	29.0017	28.7842	27.4356	29.2153	1.11651
Q7N907	radA	25.5158	25.1246	25.077	25.168	24.8974	25.1752	1.11646
Q7N993	plu0450	25.2015	-	-	25.0428	-	-	1.11627
Q7N2I8	nuoB	29.0547	27.8748	29.1595	28.2005	28.5352	28.8786	1.11594
Q7MZV9	plu4161	28.1218	27.361	28.083	27.5134	27.7355	27.8445	1.11534
Q7NAC7	asd	28.5153	29.3253	28.7993	28.2696	28.4778	29.4208	1.11514
Q7MYY4	secG	27.9131	-	-	-	27.7572	-	1.11413
Q7N065	plu4031	27.4411	-	27.1384	-	-	27.1348	1.11341
Q7N0D1	plu3960	-	22.9048	-	-	22.7503	-	1.11307
Q7N351	plu2871	-	25.6851	-	25.5309	-	-	1.1128
Q7N3V8	purR	26.2207	-	25.3337	25.8597	25.4236	25.5911	1.11139
Q7N900	gpmB	25.982	26.3975	26.1232	26.1956	25.8397	26.0111	1.1112
Q7N5N5	flgM	28.1297	-	26.8866	27.4731	-	27.2394	1.11102
Q7NA37	plu0108	27.7143	27.3843	28.4157	27.7015	27.9347	27.4252	1.11034
Q7N7F2	nqrC	27.5257	27.0644	26.8961	27.3167	26.8858	26.8328	1.10977
Q7N055	plu4042	30.3326	30.113	30.5095	29.6626	30.5878	30.2549	1.10949
Q7MYE1	plu4738	25.1768	-	-	24.9884	25.2387	24.8549	1.1092
Q7N6E7	serS	29.9967	29.8506	29.8395	29.609	29.8777	29.7544	1.10847
Q7MZE2	uvrA	26.9647	26.7416	26.6402	26.9072	26.7877	26.2078	1.10797
Q7MZS9	plu4195	26.6688	-	-	26.5215	-	-	1.10757
Q7N5W6	plu1813	-	25.5888	-	25.4416	-	-	1.10746
Q7MYP4	plu4631	-	-	26.6183	26.4002	26.7094	26.3059	1.1069
Q7MZ96	hemG	26.4781	26.6798	26.9191	26.4279	-	26.664	1.1068
Q7N1Z2	adiA	25.3903	-	-	25.6079	25.2475	24.877	1.10666
Q7N229	fdx	27.1844	27.1321	27.3308	26.852	27.3852	26.9767	1.10532
Q7N4W2	plu2202	32.9217	32.5519	32.849	32.1459	32.688	33.0573	1.1048
Q7N535	plu2125	32.6072	32.2092	32.7017	31.9742	32.6844	32.4318	1.10383
Q7N588	lolB	26.1446	-	26.0252	25.92	-	25.9684	1.10242
Q7MZT0	plu4194	30.9951	30.6441	30.7333	30.2584	31.0446	30.6476	1.10237
Q7N3W8	gst	32.9543	32.5504	32.5493	32.6106	32.4134	32.6088	1.10223
Q7N0T4	plu3795	36.7236	36.5989	36.4777	36.6651	36.8385	35.8754	1.10223
Q7N9M7	glyQ	28.3892	27.9944	28.0542	28.1777	27.8901	27.9488	1.10218
Q7N2V4	eutB	28.6952	28.3161	28.484	28.1214	28.3795	28.5741	1.10201
Q7N3P7	infC	30.3917	29.7777	30.4286	29.4779	30.5606	30.1402	1.10177
Q7N7C9	plu1223	-	-	28.0318	27.8063	-	27.9776	1.10176
Q7N1U7	grpE	31.5676	31.2528	31.1374	31.1083	31.3613	31.0704	1.10134
Q7MB42	plu2084	-	26.0067	25.9183	-	-	25.8233	1.10133
Q7N0B4	rpoD	29.9891	29.0771	30.0411	29.4085	29.3279	29.9552	1.10085
Q7N4C4	plu2424	26.7056	-	26.6505	26.2209	26.9626	26.435	1.10078
Q7N9P2	gmk	-	-	26.5629	26.426	-	-	1.09953
Q7N4R1	plu2261	27.2458	27.3777	27.3467	26.9144	27.4845	27.1621	1.09917
Q7N620	pepN	30.7466	30.8723	30.8819	30.4377	30.9937	30.6611	1.09892
Q7N4W3	plu2201	28.2763	28.176	27.9175	27.7404	28.0113	28.2098	1.09891
Q7N7F6	plu1194	-	-	24.7995	-	-	24.664	1.09848
Q7MB44	plu1882	27.2964	26.7137	27.3075	27.1764	26.6381	27.099	1.09787
Q7N2V9	plu2965	25.8964	-	25.3378	25.5126	-	25.4525	1.09775
Q7N031	plu4072	28.6901	28.4404	29.1293	28.6014	28.4891	28.7676	1.09726
Q7N1V4	idi1	23.7634	24.8963	-	23.5895	24.8025	-	1.0972
Q7N804	plu0945	26.5233	-	-	25.853	-	26.9261	1.09711
Q7N1B1	plu3567	28.77	28.4331	28.8958	28.7568	28.3787	28.5627	1.09703
Q7N1M1	plu3450	26.8795	26.5	26.446	26.5428	26.4196	26.4625	1.09698
Q7N802	plu0947	31.1571	30.7461	31.0885	30.2733	31.3964	30.9232	1.0965
Q7N6G9	grxA	29.8699	29.7242	29.4727	29.2178	29.932	29.5188	1.09638
Q7NA96	glmU	27.2082	27.1918	27.2695	26.6155	27.2584	27.398	1.09622
Q7N1F9	plu3517	32.4484	33.1127	32.8889	32.5259	32.8473	32.6796	1.09611
Q7N088	plu4005	28.1613	28.0253	28.3494	27.9955	27.8927	28.2511	1.09601
Q7N3P6	thrS	29.945	29.8277	30.1798	29.5354	29.9611	30.0632	1.095
Q7N8P4	frr	31.1602	31.089	31.2219	30.6891	31.2611	31.1295	1.09463
Q7N0T5	plu3794	31.6926	31.6397	31.6224	31.8962	31.6923	30.9751	1.09456
Q7N548	ruvA	26.3816	-	26.2533	26.2806	26.1931	26.0885	1.09432
Q7N4Q6	plu2266	-	28.0437	27.6288	27.4071	27.7183	27.9946	1.09396
Q7N5P5	plu1901	29.0996	29.279	29.5114	29.1482	29.0437	29.3133	1.09297
Q7N654	plu1715	27.4032	-	26.233	26.5164	26.8636	-	1.09282
Q7N3U1	sufA	25.7673	-	25.5674	25.11	25.6499	25.862	1.0918
Q7N523	minD	28.7437	29.1035	28.8699	28.6495	28.9566	28.7313	1.09169
Q7N1B9	plu3557	26.8021	26.8968	26.6488	26.559	26.7343	26.6777	1.09092
Q7N378	rne	29.6214	29.4782	29.7794	29.4117	29.4957	29.5953	1.09087
Q7N583	kdsA	29.3586	29.2884	29.5695	29.0334	29.6135	29.1956	1.09026
Q7N941	plu0510	27.6561	26.4561	26.7975	26.9906	26.6856	26.8603	1.09002
Q7MY87	wblE	24.9914	-	24.0247	-	-	24.3838	1.08998
Q7N707	plu1375	28.6671	27.9643	29.1798	28.2385	28.3248	28.8759	1.08977
Q7N740	plu1322	-	25.9776	24.7213	25.6649	24.7873	-	1.08928
Q7N1C5	dsbC	27.0516	28.1869	27.7584	27.2767	27.2749	28.078	1.0886
Q7N9S3	plu0241	27.6064	27.9783	27.8968	27.341	27.9738	27.8005	1.08826
Q7N1Z5	plu3316	-	25.2685	-	-	25.1466	-	1.08814
Q7N9R1	plu0253	28.4995	28.4379	28.0371	28.2091	27.9842	28.417	1.08778
Q7N6H9	plu1571	27.0966	25.9529	25.9789	25.966	26.3752	26.3243	1.08746
Q7N487	trpC	33.1306	33.4834	33.0824	33.3396	32.9562	33.0396	1.08699
Q7N9E9	engB	27.7515	28.5433	27.59	28.1624	27.6591	27.7064	1.08596
Q7MAY9	plu4391	25.4351	26.0515	25.5371	-	25.4946	25.6172	1.08569
Q7N0D8	icc	25.5473	26.1071	-	-	25.7086	-	1.08568
Q7N527	plu2133	27.1368	26.8136	27.0156	27.0318	26.8268	26.7528	1.08541
Q7MZ98	aceB	26.5454	26.2029	26.2584	26.2058	26.3042	26.1438	1.08498
Q7MZK5	plu4280	25.8337	25.864	25.8845	25.6219	26.0255	25.5835	1.08454
Q7N3P2	yfeB	26.0219	-	26.0777	25.8632	-	26.0024	1.08448
Q7N0C4	plu3967	29.0558	28.8947	29.1792	29.2708	28.8631	28.6454	1.0843
Q7N225	nifU	29.4153	29.1393	29.1021	28.8505	29.1862	29.2714	1.08386
Q7N081	sspB	27.7165	26.9713	27.5727	27.1447	-	27.4637	1.08369
Q7N8P8	map	29.8938	29.9977	29.7435	29.6802	30.157	29.4501	1.08365
Q7N8V4	lptD	26.9891	27.2377	27.575	27.1786	26.6748	27.6012	1.08354
Q7N3J7	maeB	29.4135	29.3706	29.5789	29.3227	29.3478	29.3453	1.08354
Q7MYD7	argB	29.3618	30.2915	30.2609	29.286	30.0741	30.2073	1.08342
Q7N6R5	modA	26.2724	26.4648	25.8748	-	26.185	25.9927	1.0831
Q7N3H1	dapA	29.0719	28.6661	29.1088	28.7245	28.922	28.8556	1.0829
Q7N3Q7	arnA	28.7993	28.3898	29.3961	29.5908	27.3074	29.3433	1.08268
Q7N216	glyA	32.3487	32.2084	32.1971	31.8885	32.4828	32.0394	1.08259
Q7N0Y8	plu3741	-	26.1092	-	26.1671	25.6786	26.1389	1.08252
Q7N9B3	rpsG	33.2604	32.9878	33.1279	32.5034	33.4757	33.0543	1.0824
Q7MYB9	rraA	29.2148	-	28.8131	-	-	28.8998	1.08233
Q7N6S0	gpmA	31.1481	31.145	30.7967	30.9849	31.0136	30.7497	1.0821
Q7N835	eno	32.5439	32.4365	32.2157	32.0576	32.575	32.223	1.08185
Q7N0H5	sbcC	26.7153	26.3591	26.1928	26.2207	26.4281	26.2781	1.08182
Q7N299	aroC	27.3963	27.0797	27.4444	27.095	27.2522	27.2337	1.08159
Q7N9U3	phoU	28.0044	26.7986	27.0443	27.1008	27.3125	27.0955	1.08134
Q7N6B3	plu1643	27.0833	27.6002	27.3733	27.0099	27.3708	27.3388	1.08109
Q7N095	plu3998	-	-	27.2546	27.0114	-	27.273	1.08101
Q7N581	plu2075	30.5345	30.4079	30.3595	30.2836	30.4813	30.2002	1.08092
Q7MYV3	plu4565	33.6091	34.1899	34.0085	33.4473	34.0075	34.0211	1.07963
Q7N870	panC	27.2876	26.6019	27.1077	27.3039	26.5337	26.8294	1.07928
Q7N282	plu3206	25.5109	25.9154	-	25.7411	25.706	25.3627	1.07915
Q7N4W0	hcaE	30.9421	30.2973	31.3528	30.6394	30.4489	31.1751	1.07895
Q7N6D9	ansB	31.1357	31.2115	30.7193	31.0823	30.9923	30.6661	1.07821
Q7N966	thiG	27.1214	-	27.5183	26.7425	27.2087	27.6824	1.07819
Q7MZ05	plu4506	25.8948	26.0195	26.2165	26.1688	25.7015	-	1.07809
Q7MZ92	fadB	29.7157	29.7204	29.7307	29.4173	29.8377	29.5872	1.07787
Q7N3S4	plu2639	29.2738	29.8876	29.0565	29.71	28.9418	29.2417	1.07786
Q7N6J0	gnd	30.8087	30.7213	30.652	30.5457	30.5045	30.8081	1.07763
Q7N6X8	pgm	28.5559	27.9506	28.7687	28.3634	28.1737	28.4153	1.07739
Q7N5J3	fliA	25.8195	24.7089	-	25.1778	25.3774	24.919	1.07634
Q7N766	lipB	-	-	24.0745	-	-	23.9687	1.07614
F5HGP5	cpmB	29.9447	28.6202	29.3787	29.6032	28.3528	29.6729	1.07545
Q7N1B7	plu3560	28.3471	28.2084	27.9642	27.909	28.4145	27.8837	1.07489
Q7N5M8	flgG	25.4837	-	-	25.3796	-	-	1.07484
Q7N2V2	plu2972	26.3111	28.2777	27.0402	27.2601	27.1659	26.8914	1.07464
Q7NAB5	plu0019	-	-	24.5957	-	-	24.492	1.07455
Q7N6Y2	gltX	29.8055	29.7294	29.6591	29.803	29.5359	29.544	1.07451
Q7N0D4	plu3956	28.5868	28.3467	28.6694	28.1515	28.7426	28.4002	1.07389
Q7MZ09	plu4502	31.0048	30.2531	30.7974	30.4011	30.6421	30.7039	1.07378
Q7MB18	lsrB	25.8753	26.4419	26.8272	-	26.0341	26.5235	1.07376
Q7MZ99	aceA	28.8455	28.1346	28.1679	27.7073	28.5914	28.5419	1.07359
Q7N8T6	ptrA	26.4503	26.6651	26.5699	26.145	26.6369	26.5969	1.07337
Q7N520	plu2140	27.834	27.9215	27.9245	28.0022	27.7681	27.6065	1.07255
Q7N2B3	usg	-	-	26.1834	26.0829	26.0629	26.1015	1.07249
Q7MZB3	lysC	-	-	25.5886	25.1023	25.5361	25.8266	1.07199
Q7N795	tyrA	26.014	-	26.7922	25.96	26.1199	26.8292	1.07183
Q7N3I8	entB	27.9855	28.3831	27.7438	27.9021	27.5552	28.3597	1.07063
Q7N1W8	nadB	31.8268	34.779	32.3311	32.572	34.1073	31.9635	1.07033
Q7N231	pepB	30.9596	31.259	31.1838	30.8141	31.309	30.9869	1.06989
Q7N9S1	plu0243	28.0526	27.9561	28.2747	27.795	28.1755	28.0208	1.06983
Q7N0E7	sohA	-	-	25.6475	-	25.5717	25.5289	1.06971
Q7MY00	plu4899	26.0778	-	25.9781	25.8081	25.8966	26.089	1.06933
Q7MY13	plu4883	26.0636	26.0091	25.6907	25.7993	25.8909	25.7841	1.06909
Q7N5P4	plu1902	28.3994	28.704	29.063	28.5523	28.6207	28.7076	1.06826
Q7N4J5	plu2342	31.2482	31.4761	31.25	31.7214	30.5238	31.4448	1.06788
Q7N4J0	goaG	28.0568	28.4473	28.4343	28.1247	28.4661	28.0678	1.0668
Q7MYK5	plu4672	25.2238	-	-	25.1317	-	-	1.06594
Q7N147	murG	25.2949	25.0905	25.325	24.9359	25.3702	25.1283	1.06584
Q7N6R2	plu1479	25.3435	25.4962	25.1922	-	25.2824	25.2216	1.06583
Q7N7B2	proB	25.6587	25.1387	-	25.5483	25.1645	25.211	1.06494
Q7N6D6	serC	31.2264	31.0656	31.0856	31.0033	30.9864	31.1167	1.06466
Q7N0P3	plu3838	27.1538	26.6016	27.5696	26.6425	27.372	27.0397	1.06456
Q7N5X6	plu1803	25.9895	-	-	26.1863	26.2969	25.2151	1.06438
Q7NA57	damX	27.6384	27.6525	27.336	27.3951	27.789	27.1735	1.06421
Q7N3N9	plu2676	26.3497	26.7299	26.5013	25.8265	26.7196	26.7665	1.06398
Q7N9J8	plu0332	27.4028	26.9096	26.8982	26.9925	27.0099	26.9404	1.06384
Q7N2S4	plu3001	27.913	29.1131	29.3811	28.2747	28.7553	29.1103	1.06362
Q7N3L6	manZ	28.8088	29.7619	28.9847	29.2416	29.0345	29.0129	1.0635
Q7M7B0	plu0547	26.4805	26.874	26.9087	25.95	26.8797	27.1702	1.06273
Q7N442	plu2512	28.4767	28.2783	28.5047	28.501	28.0691	28.4285	1.06216
Q7N0J7	dxs	27.6715	27.0655	27.0286	27.4	27.017	27.0883	1.062
Q7N3H3	purC	30.4874	31.1669	30.8086	30.3767	31.0921	30.7338	1.06197
Q7N9A4	rpoB	32.4569	32.116	32.4746	32.0541	32.3692	32.3652	1.06169
Q7N6L7	plu1532	-	-	26.5175	-	-	26.4316	1.06141
Q7N184	plu3611	32.62	33.114	32.9583	32.5314	33.0588	32.8445	1.06133
Q7MB99	glyS	30.0807	29.7582	29.9977	29.7638	29.9513	29.8647	1.06112
Q7N086	elbB	28.6423	28.5445	28.6334	28.5105	28.4673	28.5904	1.05997
Q7N2C1	plu3165	27.3917	27.4723	27.9838	27.2523	27.4237	27.9213	1.0596
Q7N176	acnB	31.6238	31.2391	31.6441	31.2632	31.5183	31.4805	1.05826
Q7N271	plu3220	31.3564	32.1726	31.3964	31.5318	31.4833	31.6684	1.05749
Q7N8Z1	tal	31.2404	31.3967	31.1248	31.2321	31.094	31.194	1.05749
Q7N4F5	rnb	28.3382	28.1632	27.9128	28.1827	28.0385	27.9523	1.0572
Q7MYW4	plu4552	-	25.2615	-	-	-	25.1824	1.05638
Q7N6I7	plu1563	32.3998	32.6138	32.4006	32.3117	32.5132	32.3542	1.05581
Q7N8M9	rof	27.4719	27.727	28.1202	27.3908	27.7576	27.9377	1.05532
Q7MZF3	plu4336	26.0682	-	-	25.9345	26.2693	25.7678	1.05529
Q7N2N2	plu3044	28.5095	27.6831	27.3853	27.8199	27.7446	27.7824	1.05481
Q7N3G9	bcp	29.7512	29.8723	29.8722	29.3838	29.989	29.892	1.05479
Q7N816	plu0932	26.3845	27.0825	26.3077	26.5045	26.691	26.3484	1.05478
Q7N3I3	plu2733	27.243	26.4037	27.0164	27.0002	26.6224	26.8138	1.05375
Q7MB98	crp	31.3026	31.1981	31.0214	31.1891	31.219	30.8875	1.05369
Q7N0E4	dkgA	31.8582	32.1316	32.0765	31.7003	32.2206	31.9213	1.05316
Q7N0P5	adk	31.6543	31.5345	31.7098	31.2833	31.6803	31.7117	1.05295
Q7N3M4	pip	27.6553	-	27.1424	27.1682	-	27.4811	1.05281
Q7N5B9	plu2035	28.006	28.7689	28.1866	28.079	28.2321	28.4283	1.05263
Q7N361	plu2860	26.6687	26.0886	26.2709	-	26.3273	26.2106	1.05249
Q7N593	plu2063	30.1432	30.0204	29.5154	30.1296	29.5159	29.8135	1.05213
Q7N7H6	plu1173	26.5629	26.0438	26.3134	26.3542	26.4069	25.9402	1.05184
Q7N0E8	metC	25.8267	26.0315	26.0965	25.9137	-	-	1.05059
Q7MZC1	plu4371	32.0913	32.7983	32.5107	32.1164	32.5289	32.5451	1.04969
Q7MYI1	fmt	27.544	26.9371	27.1467	27.0278	27.1864	27.2051	1.04934
Q7N404	sppA	29.2787	28.6315	29.1181	28.8198	29.0672	28.9337	1.04916
Q7N4H6	plu2361	31.605	31.5206	31.8043	31.3498	31.8045	31.568	1.0491
Q7MYY6	nusA	31.2167	30.7289	31.0234	30.8966	31.0385	30.8288	1.04853
Q7N803	tktA	31.8537	31.9241	31.7766	31.8653	31.6955	31.789	1.04841
Q7N7V2	plu0999	26.614	26.9721	26.5151	26.431	26.9173	26.5484	1.04841
Q7N4P9	bglA	25.9712	27.2312	27.0539	26.3241	26.9828	26.7452	1.04831
Q7N295	hutU	29.8261	29.2614	29.565	29.4264	29.6932	29.339	1.04582
Q7MYL8	wecC	26.0225	-	26.854	26.0849	-	26.6633	1.04547
Q7N0S6	plu3803	32.1315	32.9527	32.1333	32.0814	32.6259	32.3185	1.0453
Q7N6B5	plu1641	27.0725	26.5092	27.1161	26.8945	26.9484	26.6653	1.04478
Q7N7C2	plu1233	-	-	25.8776	25.9705	-	25.6594	1.04442
Q7N781	mprA	32.4637	31.9672	32.2377	31.941	32.7423	31.799	1.04398
Q7N0H1	plu3917	28.8652	29.0539	28.6759	28.7563	28.9604	28.692	1.04395
Q7N6F8	cspD	27.7106	-	27.2229	27.1562	-	27.6537	1.04373
Q7N9S5	typA	28.9739	28.7644	29.1096	28.7499	29.0512	28.8618	1.04368
Q7N6J2	asmA	24.1981	-	-	24.1365	-	-	1.04365
Q7N977	malP	29.2064	27.5981	28.5498	28.0312	28.7145	28.4263	1.04305
Q7N5U5	plu1837	26.3162	26.1474	26.7269	26.1228	26.0558	26.8306	1.04274
Q7N7E8	apbE	25.9171	26.1955	26.1694	25.9158	-	26.1515	1.04272
Q7N0Y9	plu3740	27.5255	-	27.6202	27.5679	-	27.4585	1.04223
Q7MZI3	plu4304	-	27.222	26.6886	27.2018	26.6501	26.8353	1.04216
Q7N736	fur	28.8864	29.3706	-	28.6272	29.2366	29.3435	1.04204
Q7N397	nagZ	25.1747	25.1461	24.2311	-	-	24.7914	1.04188
Q7N538	zwf	28.7253	28.4885	28.7928	28.5138	28.8316	28.4839	1.04183
Q7N6X9	seqA	25.5073	-	-	25.172	-	25.7254	1.04147
Q7N5V5	plu1827	26.7451	25.2615	26.8866	25.9685	26.0111	26.7383	1.04134
Q7N5S9	cheZ	27.1633	25.0781	-	26.1124	26.2523	25.8222	1.0413
Q7N5A8	plu2048	27.1378	28.296	27.9352	27.7563	27.2699	28.1677	1.0413
Q7N9B1	tuf1	35.3631	35.4338	35.5071	35.2837	35.4807	35.365	1.04117
Q7N954	purH	29.7154	29.5424	30.2068	29.6957	29.5423	30.0523	1.04107
Q7N6T5	pal	33.1531	32.3507	32.8476	32.731	32.7977	32.6496	1.04081
Q7N6X0	plu1415	29.0566	28.1378	28.9101	28.58	28.4615	28.8898	1.04081
Q7MYV2	plu4566	31.4236	32.4394	32.1947	31.4579	32.0578	32.3724	1.03998
Q7N749	corC	26.1097	-	26.3805	26.235	-	26.1435	1.03947
Q7MZH0	hsdM	27.1029	27.0144	26.8375	26.9342	27.1374	26.7174	1.03905
Q7MZC2	plu4370	28.5251	29.5912	28.8207	28.8329	28.8416	29.099	1.03849
Q7MYF5	rpsS	30.9922	30.7729	31.6227	31.3297	30.2783	31.6163	1.03849
Q7N054	ptsN	25.9027	25.5214	25.5994	25.5938	25.6316	25.6378	1.03775
Q7N024	plu4079	24.9625	-	24.1355	-	-	24.4964	1.03711
Q7N7H4	plu1175	26.918	27.7614	26.7189	26.7348	-	27.4267	1.03671
Q7MZ93	pepQ	29.2754	29.1092	29.1423	29.2977	28.6992	29.3801	1.03527
Q7N8N8	skp	30.0384	29.7102	29.7559	29.6981	29.9201	29.7368	1.03512
Q7MY33	walN	25.6835	-	25.1691	25.5171	-	25.2366	1.0349
Q7N3U7	plu2616	26.3584	26.4862	26.3643	26.6252	26.106	26.3293	1.03487
Q7N3H0	gcvR	27.5154	27.3608	27.5748	26.9176	27.8476	27.5379	1.03476
Q7N6I2	hisB	25.0515	25.8743	25.3751	26.0257	25.3716	24.757	1.03447
Q7MAY1	truB	26.8345	27.0144	27.0537	27.0261	26.7483	26.982	1.03435
Q7N000	ftsY	28.5927	28.1601	28.3847	28.3622	28.1224	28.5118	1.03312
Q7N901	plu0558	25.731	26.3809	-	26.2808	26.1121	25.6343	1.03304
Q7N0R6	plu3815	25.6481	-	25.7046	-	-	25.6298	1.03278
Q7N5Q9	plu1885	32.0211	31.6952	31.8788	31.6487	32.1376	31.6703	1.0325
Q7N7T9	plu1013	27.736	28.1257	27.4773	27.7478	27.9523	27.5029	1.0319
Q7N735	fldA	28.5309	29.2619	28.4164	28.492	28.6792	28.9047	1.03128
Q7MYC1	hslU	32.4573	31.8162	32.324	31.7975	32.4736	32.1964	1.0305
Q7N5I8	plu1960	29.2167	29.4063	29.4492	29.0026	29.5828	29.3569	1.03048
Q7N0Q3	ushA	28.7141	28.5098	28.4954	28.221	28.7336	28.6351	1.0304
Q7N5Y4	plu1795	32.7781	32.6756	32.7118	32.4907	32.7183	32.8276	1.03025
Q7MAX9	purA2	30.1676	30.2297	30.2561	30.0526	30.3514	30.1205	1.03023
Q7N032	mreB	28.7778	28.6922	28.8721	28.6852	28.8221	28.7067	1.03006
Q7N9L6	plu0306	26.0495	26.2811	26.3284	26.0683	26.1701	26.2924	1.03005
Q7N8Q1	plu0668	31.0333	31.1019	31.1878	30.9075	31.2547	31.0328	1.03003
Q7N220	treC	30.295	29.9321	29.7967	30.1438	29.9845	29.7677	1.02998
Q7MB91	plu0507	26.0699	-	25.7056	25.6153	26.0888	25.8328	1.02962
Q7N288	fadJ	27.3716	27.0553	27.6772	27.435	27.3697	27.1749	1.02918
Q7N221	suhB	27.7746	27.8596	27.6002	28.2747	27.5179	27.3187	1.02885
Q7N6C3	plu1633	29.1528	-	28.6355	28.7913	29.2315	28.5399	1.02806
Q7N0E9	exbB	29.0697	29.0412	29.4094	28.9643	29.187	29.2503	1.02781
Q7MYK6	plu4671	26.6337	25.5906	26.2524	26.1618	26.0583	26.1384	1.02771
Q7N617	pyrD	27.3103	27.1168	27.7879	27.3265	27.3195	27.4529	1.02724
Q7N7H8	plu1171	29.1097	28.5349	28.6006	28.2203	29.1047	28.8039	1.02722
Q7N042	plu4061	26.723	27.0598	26.8401	26.9128	26.7447	26.8494	1.02717
Q7N2M6	gyrA	30.5969	29.681	30.275	30.1669	29.84	30.4312	1.0269
Q7N3G6	plu2751	30.1737	29.9022	30.3333	29.7172	30.4507	30.1264	1.0269
Q7N7I1	plu1168	30.1608	30.1234	30.0941	30.1659	29.863	30.235	1.02677
Q7MY89	wblD	26.819	26.9884	26.9195	26.5916	26.989	27.0358	1.02582
Q7MY85	wblG	26.967	25.9002	26.9139	26.2862	-	26.8303	1.02487
Q7N9K6	plu0318	29.894	30.9944	30.2609	30.3162	30.4764	30.2536	1.02409
Q7MZ87	hemB	28.1044	28.3649	28.1908	27.8905	28.3903	28.2804	1.02315
Q7N4R2	plu2260	31.909	32.3666	32.3878	32.2485	32.1703	32.1458	1.0231
Q7N5J4	fliC	36.0714	35.1384	35.6803	35.697	35.6775	35.4187	1.02263
Q7N784	plu1274	28.8144	28.0003	28.8565	28.4912	28.5107	28.5724	1.02262
Q7N8X2	ileS	29.612	29.6005	29.7717	29.2439	29.7022	29.9414	1.0226
Q7MZD5	tyrB	30.21	30.0351	30.2452	29.7418	30.4362	30.2158	1.02257
Q7MYU3	hflC	31.0267	30.9962	31.0479	30.8462	31.1365	30.9916	1.02253
Q7N6V8	sdhB	28.6835	28.2859	28.5789	28.7358	27.8365	28.8804	1.02236
Q7N1E0	plu3536	-	26.4097	-	26.2812	-	26.4745	1.02234
Q7N811	plu0938	27.0978	26.8126	27.2131	27.0712	26.8035	27.1534	1.02226
Q7N970	plu0477	28.3681	27.8845	27.0988	27.9376	27.9172	27.4019	1.02211
Q7M7D8	plu1904	-	-	25.6364	25.4155	-	25.7958	1.02154
Q7MYC2	hslV	29.2004	29.5876	29.7154	28.6809	29.8828	29.8478	1.02146
Q7N7C8	plu1224	26.3932	26.9461	26.9982	27.266	26.3365	26.6432	1.02143
Q7N012	plu4092	31.3274	31.4544	31.6291	31.6014	31.0332	31.6847	1.02137
Q7MZ22	plu4486	25.2714	-	25.2345	-	-	25.2231	1.02094
Q7N6D2	ihfB	28.9589	28.605	29.1681	28.3592	29.3764	28.9079	1.02065
Q7MAY0	fklB	30.8379	30.7608	30.9438	30.5738	30.9393	30.9411	1.02061
Q7N3J8	plu2718	28.4099	28.0039	27.903	28.383	27.9675	27.8782	1.02057
Q7N0S2	purE	27.7987	27.6511	27.0866	27.3333	27.8068	27.3088	1.02043
Q7MAZ7	groL	36.7655	36.3893	36.6493	36.4483	36.7891	36.4819	1.0198
Q7N3Z4	nhaB	26.322	-	-	26.2943	-	-	1.01938
Q7N4B0	sohB	28.8726	28.5341	28.8598	28.4821	28.8595	28.8425	1.01922
Q7MYV8	plu4558	28.6449	28.9071	29.0195	28.5062	29.2372	28.7459	1.01917
Q7MYZ0	pnp	31.6577	31.629	31.8325	31.4314	31.7597	31.846	1.01914
Q7MYD8	argG	32.4074	32.6557	32.4761	32.2843	32.5743	32.5985	1.01914
Q7MZ81	ubiE	27.0908	26.6302	26.9657	26.8241	26.8976	26.8833	1.01906
Q7MB63	miaB	27.1004	26.6339	26.9347	26.6645	26.902	27.0215	1.01892
Q7N9W2	nfuA	28.8793	28.6178	28.7184	28.6841	28.6923	28.7583	1.01882
Q7N1W6	srmB	28.7515	28.5013	29.346	28.4407	28.8752	29.2039	1.01844
Q7N5C5	plu2029	28.8356	28.9241	29.3063	28.8697	29.4211	28.6967	1.01828
Q7MYW6	fbp	30.3031	30.3225	30.3291	30.0454	30.4437	30.3878	1.01813
Q7N4H8	fumC	31.8317	31.6874	31.7121	31.6965	31.7534	31.7047	1.01787
Q7M7E0	plu1129	26.7861	-	26.794	-	-	26.7648	1.01762
Q7N0Z0	aldB	34.7966	34.9265	34.6937	34.6672	34.9524	34.7233	1.01719
Q7N8V5	surA	29.366	29.3827	29.3748	29.1776	29.5351	29.3382	1.01692
Q7N744	nagE	27.9165	27.6883	28.0154	27.978	27.9014	27.6697	1.01655
Q7N869	panB	26.7004	26.8855	26.9174	26.7612	27.0083	26.6629	1.01654
Q7N3B7	icd	33.7503	34.323	33.807	33.7706	34.2121	33.8281	1.01621
Q7N156	secA	29.9348	29.6887	30.0518	29.627	30.0141	29.9653	1.01604
Q7N622	asnS	31.9588	31.8591	31.7937	31.7785	31.8647	31.8997	1.01602
Q7N767	lipA	26.6947	-	26.4385	26.6844	26.4615	26.4872	1.01551
Q7MYH5	rpoA	32.4131	32.2159	32.6123	32.1073	32.5825	32.4853	1.01538
Q7N152	ftsZ	30.4582	30.0832	30.0193	30.0837	30.4167	29.997	1.01473
Q7N0P6	hemH	26.5622	27.58	26.8505	27.063	26.8318	27.0354	1.01457
Q7MB85	cysH	25.3266	25.4498	25.6867	25.1375	25.9571	25.3072	1.01428
Q7N0I9	ribH	28.6187	28.6486	28.8319	28.7473	28.6113	28.6794	1.01422
Q7NAC9	plu0005	27.9663	28.5041	27.9904	28.501	27.8306	28.0707	1.01362
Q7MZ54	fecB	29.0302	-	-	29.0856	28.9358	-	1.01361
Q7N2M5	ubiG	25.9071	-	-	-	25.8877	-	1.01358
Q7N904	yjjK	31.7814	31.6577	31.7873	31.4925	31.8967	31.7789	1.01353
Q7N9Z1	plu0160	24.1673	-	-	24.0511	24.5268	23.8691	1.01277
Q7N8V8	apaG	26.9659	-	-	27.1191	26.9193	26.8055	1.01247
Q7N2F0	plu3130	32.6057	32.3899	32.5405	32.4703	32.4732	32.5405	1.01208
Q7N2W4	plu2960	27.7473	28.2783	27.9474	28.3239	-	27.6235	1.01206
Q7N845	hemL	29.3412	29.1719	29.0354	28.8275	29.4455	29.224	1.01199
Q7N8U8	tbpA	26.4761	27.623	26.9283	26.8387	27.1523	26.9872	1.01143
Q7MZU4	plu4180	31.5378	31.4852	31.406	31.276	31.495	31.6102	1.01111
Q7N7M2	plu1095	26.9398	-	26.6415	26.4185	27.1667	26.739	1.01109
Q7N0I5	secD	29.9837	29.8022	29.7824	30.0235	29.7584	29.7436	1.00992
Q7N769	cspE	32.3452	33.609	32.5678	32.8423	33.0638	32.5753	1.0094
Q7MY08	plu4890	30.0164	29.8815	29.9673	29.6542	30.3146	29.8573	1.00907
Q7N6K7	folE	27.7892	27.5046	27.9406	27.6559	27.3085	28.2322	1.00876
Q7N8M4	metQ	30.4758	30.0389	30.279	30.0456	30.3945	30.316	1.00872
Q7N9Q7	plu0257	28.9409	29.3114	28.7037	28.9676	29.3304	28.6279	1.00699
Q7N075	degQ	30.0479	30.215	30.2429	30.1253	30.2035	30.1475	1.00683
Q7MZY9	plu4118	28.0926	28.7891	28.4126	28.5719	28.499	28.1971	1.0061
Q7MZ18	argI	28.793	29.6783	30.2423	28.7895	29.6059	30.2925	1.00593
Q7N3Y0	plu2582	25.9721	25.8252	26.0592	26.0614	25.6679	26.1028	1.00567
Q7NAB0	plu0024	25.4473	25.7211	25.739	25.3819	25.8379	25.6649	1.00526
Q7N8Z0	mog	25.7481	25.6842	25.7454	25.3638	26.0768	25.7156	1.005
Q7N4I9	plu2348	32.2293	32.2227	32.1415	32.0064	32.3655	32.2046	1.00393
Q7N6H7	dacC	29.2462	28.7463	28.8245	28.7497	29.0398	29.0132	1.00331
Q7N4Z3	pntA	30.1557	29.7206	30.2996	29.8202	30.2571	30.0856	1.00301
Q7N6I4	hisA1	26.4284	26.2465	26.3849	26.2627	26.3673	26.4199	1.00231
Q7N6P5	moaC	26.2269	26.4808	26.8142	26.0392	-	26.9689	1.00222
Q7MYV6	plu4562	26.0415	25.7575	26.7831	25.6493	26.5992	26.3241	1.00219
Q7N650	plu1719	26.4133	25.3363	25.03	-	25.4815	25.6988	1.00213
Q7N2T0	cbiT	27.1693	27.7549	28.0008	27.2596	28.0176	-	1.00212
Q7N7A5	alaS	29.778	29.6672	30.0192	29.7689	29.6948	29.9925	1.00186
Q7N0H2	plu3916	29.385	29.1309	29.4956	29.3163	29.4559	29.2344	1.00115
Q7N5L7	plu1931	28.0466	-	27.796	27.4253	28.1786	28.1552	1.00112
Q7N011	plu4093	31.2033	30.8977	31.5099	30.958	31.4079	31.2414	1.00083
Q7MYS8	orn	26.7615	-	26.4365	26.1817	26.8174	26.7945	1.00081
Q7N2E1	lsrK	26.9168	26.3867	26.9272	27.1825	26.5032	26.5422	1.00063
Q7N4B4	topA	29.9584	29.6367	29.8663	29.8481	29.7169	29.895	1.00033
Q7N580	plu2076	30.421	29.6161	30.3169	30.1472	30.0693	30.1381	0.999859
Q7N4M2	plu2303	30.0752	29.9215	30.0656	29.8267	30.1966	30.0413	0.999494
Q7N9A6	rplJ	33.4937	32.9114	33.2873	33.0325	33.4877	33.1768	0.998952
Q7N0N1	acrA	31.0074	30.5357	30.8119	30.5731	30.8058	30.9812	0.99882
Q7N763	rlpA	-	26.2905	-	26.2778	26.3068	-	0.998729
Q7N5Y6	plu1793	30.8818	30.2967	31.1685	30.6368	30.7965	30.9194	0.998698
Q7MY07	plu4891	29.6108	29.422	29.6227	29.4372	29.5956	29.6304	0.998218
Q7N173	aceF	31.3111	31.0668	31.4171	30.9441	31.4885	31.371	0.99805
Q7N0G2	cpdB	29.0629	30.0256	29.4703	29.5278	29.4334	29.6079	0.997632
Q7N3T0	plu2633	30.3609	30.5943	30.2092	30.6641	30.2718	30.2396	0.997462
Q7N843	erpA	27.9759	-	-	27.9807	-	-	0.996678
Q7N8Y4	dnaK	34.2266	33.9951	34.2724	34.081	34.2412	34.1867	0.996589
Q7N4K1	plu2336	26.0365	26.6301	27.0712	26.4233	-	26.7466	0.996043
Q7N1Z4	purL	30.5245	30.3063	30.249	30.3338	30.4373	30.3258	0.996038
Q7N2N6	plu3040	28.4135	-	27.6395	28.0582	28.1498	27.8895	0.99586
Q7N0G9	plu3919	29.8012	29.6684	29.1958	29.8671	29.5428	29.2747	0.995555
Q7NA56	aroB	27.8288	27.7507	27.5836	27.8376	27.5832	27.7624	0.995383
Q7MB41	aspS	29.5524	29.4008	29.3952	29.3453	29.5622	29.4648	0.9945
Q7N6G2	artP	-	-	24.5352	24.5976	-	24.4888	0.994491
Q7MY52	plu4840	26.7511	-	26.7946	26.7948	27.0193	26.5285	0.994481
Q7N837	mazG	26.0131	-	-	26.0521	-	25.9903	0.994381
Q7N2S2	plu3003	26.8805	26.3603	26.8787	26.4737	-	26.9562	0.994191
Q7N9G1	gor	27.2791	27.2682	26.9224	27.0915	27.4159	26.9875	0.994169
Q7MYG7	rplR	32.2276	31.1645	32.258	31.5049	32.0616	32.1092	0.994114
Q7N0Y3	plu3746	29.4495	-	29.4025	29.3001	29.6443	29.3593	0.99406
Q7MYF2	rplD	32.3698	32.5408	32.6298	32.3791	32.512	32.6774	0.993522
Q7N597	plu2059	33.7164	34.0349	33.9769	34.0808	33.7753	33.9008	0.993398
Q7MY04	plu4895	29.811	30.1323	29.8522	29.9303	30.0887	29.806	0.99321
Q7N1D8	plu3538	28.2921	27.2393	26.8646	27.4592	27.5433	27.4245	0.992819
Q7N2G9	astD	28.0326	27.4755	27.0186	27.1758	28.0528	27.3295	0.992776
Q7N038	plu4065	30.8654	30.3205	30.6015	30.3878	30.7275	30.7048	0.992459
Q7MY81	wblK	26.4707	25.7741	-	26.0469	26.0204	26.3333	0.992336
Q7N955	purD	28.5787	28.669	27.9147	28.2834	28.6056	28.307	0.992283
Q7N1A9	plu3572	-	-	25.2179	-	-	25.2294	0.992047
Q7N126	leuD	-	25.5542	25.5418	25.4962	-	25.6229	0.991981
Q7N002	ftsX	26.2075	-	26.4682	26.3611	26.3053	26.3822	0.991954
Q7N9Z3	plu0158	32.8606	33.3386	33.0493	32.9938	33.2848	33.0051	0.991882
Q7N867	pcnB	25.688	25.2653	25.7002	25.5412	25.6994	25.4492	0.991616
Q7MZK6	plu4279	30.5222	30.7338	30.044	30.2579	30.9536	30.1272	0.99111
Q7N6S1	aroG	30.5222	30.3815	30.6207	30.1039	31.0104	30.4495	0.990924
Q7N9F5	dsbA	28.2852	29.1053	28.4334	28.4324	28.6389	28.7925	0.990835
Q7N5Q8	plu1886	30.8135	30.5399	30.1899	30.9523	30.4656	30.1665	0.990567
Q7N460	oppA1	28.0434	28.5509	27.6852	28.0422	27.9941	28.2843	0.990558
Q7MY48	tdh	28.102	28.2172	28.0161	28.0836	28.1752	28.1183	0.990389
Q7NAB1	plu0023	27.545	27.3629	27.3575	26.9386	27.8308	27.5378	0.990377
Q7N0B7	plsY	-	-	24.5527	-	-	24.5669	0.990219
Q7N9A3	rpoC	32.3956	32.2441	32.5481	32.3144	32.4242	32.4917	0.990208
Q7N2B6	folC	27.4741	27.2779	27.2713	27.1908	27.4996	27.3762	0.990041
Q7N8Z8	creA	25.9637	-	-	-	-	25.9785	0.98976
Q7N0A4	plu3989	27.2207	27.3729	27.1763	26.8658	-	27.6771	0.989745
Q7N6M1	dkgB	26.9497	-	27.029	-	-	27.0043	0.98967
Q7N9G9	plu0367	25.8678	25.9025	25.7784	25.7215	26.0247	25.8488	0.989369
Q7N172	aceE	33.0699	32.7736	32.8437	32.7282	33.1155	32.8905	0.989167
Q7N4B9	lapA	25.472	24.6223	-	25.3065	-	24.8198	0.988985
Q7N0R1	plu3820	31.534	31.222	31.628	31.4917	31.5742	31.3674	0.988649
Q7N3W3	slyB	28.6594	-	28.9276	28.6978	-	28.9226	0.988501
Q7N4T0	plu2237	27.677	27.1457	27.0238	27.2094	27.3534	27.3338	0.9885
Q7N0I0	ggt	29.6333	29.7886	29.9	29.5596	29.977	29.8355	0.988457
Q7MZY3	frdB	27.7836	27.5076	-	27.7379	27.7459	27.5038	0.988291
Q7N2D6	lsrF	29.4434	29.4147	29.4214	29.3594	29.7419	29.2352	0.986919
Q7N6H5	plu1575	-	28.4934	28.542	28.1249	-	28.9487	0.986845
Q7N0L4	clpX	29.1683	28.8318	29.1096	28.7044	29.2382	29.2247	0.986789
Q7MYJ5	ilvD	28.5419	28.0276	28.1542	28.4527	28.0563	28.2723	0.986768
Q7NAD2	d-	26.6342	-	26.8008	26.4062	-	27.0679	0.986557
Q7N3J6	narP	29.2497	29.025	29.5276	29.0351	29.5104	29.316	0.986376
Q7NA70	sodA	33.2057	33.6099	33.0702	33.4648	33.5034	32.9798	0.985741
Q7N5H8	plu1971	32.6025	32.5926	32.5082	32.4299	32.8264	32.5117	0.985153
Q7N4B7	acnA	31.2878	31.6053	31.327	31.1957	31.568	31.5248	0.984334
Q7MZZ2	gldA	32.1368	32.0189	31.7457	32.0125	32.1964	31.7616	0.984143
Q7N908	serB	26.2367	-	26.1103	25.8162	26.2809	26.494	0.983811
Q7MYH3	rpsK	30.4218	30.6396	30.5923	29.6886	30.7644	31.2718	0.983729
Q7MYN1	hemC	26.3907	26.7269	26.387	26.4313	26.4624	26.6827	0.983543
Q7N625	aspC	31.6694	31.5876	31.4769	31.5632	31.6645	31.5788	0.983393
Q7N2I0	pta	30.5033	29.9679	30.2245	30.4719	30.15	30.1475	0.983116
Q7N9C1	slyD	29.4726	29.6631	29.7024	29.4129	29.5197	29.9807	0.982752
Q7N8W2	carA	30.4916	30.7474	30.717	30.5734	30.7479	30.7115	0.98243
Q7N372	sbcB	26.0669	25.4081	25.8038	25.6938	25.9673	25.6945	0.982414
Q7N7E9	nqrF	-	-	24.9162	25.1587	-	24.725	0.982364
Q7N3Q5	arnB	26.3828	-	26.0791	26.2526	-	26.2621	0.98184
Q7N4I8	plu2349	33.1144	33.3131	33.1769	32.9087	33.3796	33.3988	0.981074
Q7N6M6	sseA	28.4406	29.0073	28.2537	28.7467	28.4268	28.6116	0.980904
Q7N0J9	thiI	-	26.2905	25.6311	25.7842	-	26.1944	0.98046
Q7MYJ6	ilvA	27.164	27.1959	26.8519	26.7011	27.6234	26.9732	0.980355
Q7MYG3	rplE	31.9096	31.871	32.1361	31.9634	31.974	32.0679	0.979744
Q7N564	plu2093	28.4837	28.3866	28.2252	28.2017	28.3548	28.6299	0.979219
Q7N446	plu2508	-	24.5054	-	-	24.5359	-	0.979033
Q7MYL9	rffG	25.6439	26.0158	25.5968	25.8078	25.9554	25.5862	0.978764
Q7N862	mrcB	29.3154	29.2387	29.384	29.1466	29.5229	29.3644	0.978113
Q7N7H0	proC	26.1562	25.9009	-	25.7939	26.3281	-	0.977779
Q7N3T5	ppsA	30.9309	30.8427	30.9745	30.7191	31.1208	31.0062	0.977605
Q7N3W1	gloA	25.8432	27.4927	26.38	-	26.4854	26.724	0.977574
Q7N5E0	plu2012	28.2846	29.2418	28.8216	28.6379	28.9546	28.8544	0.977417
Q7N6W3	plu1424	29.8001	29.5689	29.4468	29.6437	29.8201	29.4512	0.977343
Q7N8W0	folA	28.6194	28.5811	28.6473	28.2763	29.0312	28.6406	0.977122
Q7N5R0	plu1884	31.3025	30.8464	30.9707	30.948	31.4066	30.8654	0.977058
Q7N6K4	maeA	27.3138	27.3302	27.0588	27.2333	27.5201	27.0512	0.976749
Q7N8X4	rpsT	31.1139	30.9755	31.4411	30.2275	32.4329	30.9724	0.976648
Q7MZX9	efp	30.6775	30.0156	29.9303	30.2798	30.2372	30.2092	0.976517
Q7MZ13	plu4498	30.5373	30.3077	30.4679	30.1718	30.7574	30.4869	0.976447
Q7N703	bamB	29.6538	29.4492	29.1999	29.5383	29.5545	29.3137	0.976339
Q7N0P4	htpG	33.3208	33.0499	33.2003	33.0401	33.3992	33.2364	0.976111
Q7N091	plu4002	26.5962	26.3509	26.241	26.3765	26.6002	26.3162	0.976095
Q7MYV5	plu4563	30.7839	31.1028	31.4315	30.8299	31.1463	31.4502	0.975279
Q7N454	plu2500	26.8255	-	26.2123	26.4762	-	26.6339	0.975247
Q7N382	rpmF	31.3756	31.2231	31.5322	31.0559	31.85	31.3335	0.975241
Q7N929	plu0523	27.9183	27.4158	28.0605	28.1699	27.5364	27.7978	0.975013
Q7N6J5	mrp	28.3517	27.8812	28.1193	28.0251	28.2942	28.145	0.974418
Q7N6E2	pflB	29.7851	29.5077	29.6249	29.9815	29.231	29.8177	0.974326
Q7N462	oppB	-	-	25.7965	25.834	-	-	0.974322
Q7N792	plu1266	-	27.8055	28.0408	-	-	27.9609	0.974207
Q7NA55	aroK	29.5232	29.6065	29.3836	29.4653	29.5469	29.6153	0.973973
Q7N7Z4	fba	30.8666	30.501	30.5613	30.5654	30.8305	30.6473	0.973962
Q7N4A0	plu2452	27.1016	26.9605	27.0764	27.1884	27.002	27.063	0.973809
Q7N3F7	purM	28.7782	27.7134	27.7746	27.5978	28.4281	28.3555	0.973719
Q7N8R8	plu0650	-	-	24.8741	-	-	24.9128	0.973566
Q7MYL2	rhlB	26.8859	26.685	27.8706	27.1445	27.1737	27.2393	0.973541
Q7MY30	rpmG	30.9254	30.6136	31.3627	30.3055	31.1459	31.5668	0.973422
Q7N8P5	pyrH	26.657	-	26.6784	26.2749	26.2178	27.6285	0.973075
Q7N106	plu3720	27.4778	26.5631	28.0948	27.5881	27.292	27.3751	0.972761
Q7MZD8	hicB2	25.2584	-	-	25.2997	-	-	0.971765
Q7N8W9	ispH	25.6371	-	-	25.7256	25.6659	25.644	0.971682
Q7NA45	pckA	31.8048	31.9039	31.558	31.8897	31.7357	31.7679	0.971166
Q7N743	glnS	30.5311	30.6841	30.3687	30.4506	30.9139	30.3468	0.971014
Q7N6F1	lrp	32.301	32.262	32.1498	31.9789	32.7284	32.1335	0.97083
Q7N3Z9	gapA	33.1461	33.0779	32.8846	32.9767	33.3695	32.8929	0.970341
Q7N388	fabF	29.7967	29.6657	30.061	29.8466	29.7919	30.017	0.96991
Q7N8Z7	arcA	29.1789	29.4274	28.9509	29.0805	29.4789	29.1313	0.969617
Q7N6Q1	uvrB	25.4984	25.8103	-	25.4746	26.0516	25.5715	0.96936
Q7N7W2	hpaG2	27.6287	28.4189	27.8664	27.9331	27.8312	28.2856	0.969097
Q7N9B2	fusA	33.5387	33.745	33.4404	33.5285	33.669	33.6626	0.969068
Q7MYK9	ilvC	30.1486	30.2886	29.9103	29.975	30.5559	29.9537	0.968804
Q7N485	trpA	32.8236	32.182	33.0478	32.4764	33.0649	32.6496	0.968732
Q7N586	prfA	26.3345	26.1656	26.1627	26.4007	26.1794	26.2225	0.968198
Q7MB46	fabA	30.2107	31.1638	30.3725	31.0643	30.1715	30.653	0.967782
Q7MYL3	trxA	30.9533	31.1321	30.3361	30.825	31.0921	30.6495	0.967028
Q7N4Q1	plu2271	30.1744	30.1946	29.8576	29.8858	30.2304	30.2559	0.966939
Q7N6P6	moaA	-	-	22.527	-	-	22.5762	0.966465
Q7N0D3	plu3957	28.8985	28.3477	29.2003	28.6091	28.6266	29.3588	0.966381
Q7N029	accB	31.0714	30.809	30.5485	30.6732	30.8306	31.0737	0.966256
Q7N7X6	hpaB	32.9746	33.161	32.9282	32.9282	33.2822	33.0021	0.966235
Q7N199	gcvP	31.7036	31.7644	31.518	31.5617	31.8549	31.7193	0.965965
Q7N2W3	plu2961	26.7886	26.2372	26.4512	26.32	26.612	26.696	0.965682
Q7N4D8	plu2403	26.2198	-	-	26.3165	-	26.2243	0.965548
Q7N224	iscS	29.6711	29.597	29.6907	29.4832	29.758	29.87	0.96539
Q7MYN0	hemX	29.0244	29.1059	29.1364	29.2248	28.947	29.2477	0.965294
Q7N6H6	plu1574	29.5007	31.4477	30.751	30.668	30.1568	31.0278	0.965227
Q7N8Z6	thrA	28.7843	28.6894	28.967	28.8986	28.8552	28.8407	0.965066
Q7N064	plu4032	27.543	28.2915	27.7976	28.1299	27.7705	27.8869	0.964783
Q7N298	prmB	27.353	-	27.3569	27.036	27.6605	27.5248	0.964517
Q7N526	fadD	29.387	28.9198	29.6973	29.0503	29.3609	29.7493	0.964487
Q7N4T3	plu2234	31.7062	31.5907	31.2922	31.6681	31.7144	31.3657	0.963908
Q7N844	plu0903	27.5916	26.9078	27.8317	-	27.3377	27.6578	0.963244
Q7N9F4	plu0382	27.6627	27.5458	27.6253	27.7855	27.4714	27.7395	0.963117
Q7MYF4	rplB	33.4915	33.1723	33.6169	33.2743	33.5572	33.6123	0.963017
Q7N136	ilvH	29.7791	29.1346	29.9114	29.5227	29.8518	29.6151	0.962737
Q7MZD3	dnaB	-	-	25.5803	-	25.6352	-	0.962695
Q7N5C0	plu2034	27.4105	-	26.6524	-	27.43	26.743	0.962538
Q7N0L3	clpP	29.0313	29.0479	29.4275	28.8537	29.351	29.4676	0.962439
Q7N6J6	metG	30.1673	30.5375	30.4701	30.1904	30.5566	30.5937	0.962434
Q7N190	serA	29.1494	28.9008	29.3158	29.0628	29.2613	29.208	0.962348
Q7N6R1	pgl	30.277	30.2781	30.6251	30.3378	30.4341	30.5744	0.96233
Q7N6T6	tolB	29.9204	29.9464	30.1176	29.8321	30.1979	30.1213	0.962172
Q7MAZ2	plu4291	26.9495	26.6987	27.2522	26.9696	26.8596	27.2382	0.962159
Q7N1U3	plu3376	-	24.9789	24.7653	24.999	24.8618	24.9245	0.961686
Q7N219	treB	28.1144	28.4371	27.3272	28.2297	27.9825	27.8356	0.961659
Q7N3V0	pykF	24.7468	25.3695	-	25.1147	-	-	0.961567
Q7N7A6	recA	31.0135	31.2041	31.1679	31.0626	31.206	31.2875	0.961365
Q7MAZ6	groS	33.5112	34.2177	33.9316	33.6833	34.2569	33.8909	0.961348
Q7N5E7	plu2005	26.6953	27.3075	26.6468	27.2811	26.5996	-	0.961144
Q7N078	rplM	31.7858	32.2082	32.3689	31.8725	32.1214	32.5406	0.961108
Q7N4Z1	plu2169	26.5703	-	-	-	-	26.6277	0.961021
Q7N1Z9	plu3312	24.7299	24.5756	-	24.6634	25.0644	24.404	0.96072
Q7N4D1	plu2410	26.7032	27.0023	27.1302	26.7137	27.1148	27.1813	0.960564
Q7N3X7	pspA	28.9028	27.9452	28.9327	28.7268	28.293	28.9372	0.960085
Q7N849	plu0898	28.6852	27.2611	28.6327	28.4177	27.4419	28.8972	0.959774
Q7N5X3	plu1806	30.732	30.5414	30.3783	30.7239	30.563	30.5427	0.959719
Q7N6Y1	plu1402	24.4743	-	-	-	-	24.5343	0.959218
Q7N5D9	plu2013	30.204	30.2211	29.3603	29.9783	30.2488	29.7386	0.959213
Q7N624	ompN	35.1052	34.9082	34.8869	35.2058	35.0735	34.8013	0.959184
Q7NAD0	gyrB	29.8006	29.0956	29.8172	29.572	29.3878	29.9355	0.95885
Q7N0L5	lon	31.9526	31.4859	31.8679	31.737	32.0003	31.7527	0.958467
Q7N788	clpB	32.3884	31.7158	32.1456	31.9309	32.3247	32.1782	0.958374
Q7N3Z8	mipA	28.6475	29.7581	-	29.1295	29.6387	29.0254	0.958089
Q7N1E6	plu3530	26.6617	-	26.4146	26.6123	26.7417	26.4459	0.958015
Q7MYT9	mutL	-	25.4945	25.3667	25.4428	25.4452	25.5898	0.95789
Q7N8L5	cysI	27.3631	27.002	26.9117	27.2904	27.2943	26.8797	0.957588
Q7MYH0	rplO	31.6378	32.0637	31.6539	32.2828	31.7133	31.5474	0.957435
Q7N1X3	lepA	29.1578	28.8458	29.0633	29.0935	29.2044	28.9574	0.957426
Q7N5H3	plu1976	30.356	31.0898	31.1337	30.528	31.2964	30.9435	0.957402
Q7MZ78	plu4416	26.6795	-	25.6212	-	-	26.2131	0.957401
Q7MY46	hldD	29.9278	29.1581	29.8516	29.6778	29.6698	29.7795	0.957128
Q7N0L2	tig	32.8097	32.8869	33.1889	32.7699	33.1735	33.132	0.95707
Q7N9W0	tyrS2	27.0901	26.2992	26.9528	26.7764	26.9179	26.8381	0.957006
Q7N2R1	plu3015	-	24.6147	-	-	24.6783	-	0.956867
Q7N6G0	macA	27.2567	27.0258	26.8961	27.229	27.0447	27.0958	0.956858
Q7N0L9	plu3863	27.2637	28.3063	27.8565	27.4012	-	28.3448	0.956488
Q7N8P6	tsf	32.3311	31.5945	32.3959	32.101	32.2875	32.1277	0.956007
Q7N738	dinJ	25.9074	25.9423	26.1362	26.0603	-	-	0.955919
Q7MYG8	rpsE	33.3266	33.073	33.2528	33.0307	33.5071	33.3108	0.955674
Q7MY92	wblA	29.0553	28.5839	29.0277	28.8577	29.0876	28.9212	0.954943
Q7MZ55	fecA	28.8218	28.0904	28.5734	28.904	28.3205	28.4615	0.954753
Q7NA92	atpA	33.0612	33.2553	33.3982	32.9693	33.4063	33.5398	0.954683
Q7N384	fabH	28.1993	28.8539	28.1753	28.231	28.8049	28.3958	0.954165
Q7MYY1	ftsH	31.0116	30.9713	31.3513	31.042	31.2846	31.212	0.953878
Q7N3T4	plu2629	25.5127	25.7283	25.3513	25.4489	25.8077	25.5432	0.953166
Q7N3D8	plu2779	30.3709	31.1438	31.4387	31.3966	30.8689	30.8963	0.953001
Q7N518	plu2142	25.279	26.4259	24.7586	25.7412	-	25.3748	0.952505
Q7N2N3	plu3043	27.3233	26.5838	26.6722	27.2854	26.7091	26.7954	0.952497
Q7N8N4	lpxB	25.2241	-	25.2338	-	25.1442	25.4541	0.952493
Q7MYN9	uvrD	27.6443	27.3549	27.9239	27.527	27.7162	27.892	0.95216
Q7N755	leuS	29.208	29.4049	29.3597	29.3273	29.4416	29.4162	0.952092
Q7N592	plu2064	30.6281	29.8363	30.0989	30.0751	30.6597	30.041	0.952077
Q7N174	lpdA	31.8406	31.8862	31.9681	32.0044	32.1948	31.7095	0.951811
Q7N7F4	nqrA	28.6351	28.6741	28.4524	28.4324	29.0114	28.5334	0.951426
Q7N3Y3	tpx	32.2932	32.481	31.9126	32.1057	32.5619	32.235	0.951375
Q7N775	proV	-	26.2238	25.0051	25.6996	-	25.6735	0.951239
Q7MYB6	glpK	30.2605	30.4313	30.6464	30.1819	30.6395	30.7346	0.950929
Q7N5U4	plu1840	33.5439	34.8511	34.5196	34.3555	34.3367	34.4404	0.950888
Q7MYW7	mpl	27.2409	26.9624	27.0969	26.8998	27.5314	27.0881	0.950626
Q7N4U8	plu2217	27.5	27.2783	26.9866	26.9515	27.4599	27.5735	0.950459
Q7NA97	glmS	29.1125	29.2724	29.1015	29.2268	29.2767	29.2045	0.950075
Q7N3H2	nlpB	29.247	28.582	29.0623	29.2006	29.0347	28.88	0.949594
Q7N841	mtnN	27.8622	28.4589	28.4333	28.6683	27.853	28.4578	0.949395
Q7MZ48	plu4453	26.0314	25.6888	25.5554	25.6929	25.7776	26.0301	0.949349
Q7N2T6	cbiL	28.9901	29.7584	28.6918	29.9863	28.7798	28.9007	0.949015
Q7NA87	rsmG	25.2903	-	-	25.3099	25.6198	25.1681	0.948875
Q7N936	tcaC	25.3291	25.2093	-	25.106	25.3655	25.5646	0.948565
Q7N3I9	entA	27.4595	27.1007	27.5225	27.5424	27.4395	27.3294	0.948553
Q7N0C0	plu3971	27.978	27.8502	28.2456	28.1183	28.348	27.8381	0.948123
Q7N3T7	plu2626	26.4748	25.3391	26.514	25.8519	26.3226	26.3845	0.947985
Q7N9B8	plu0425	28.1982	27.8405	28.2714	28.1809	-	-	0.947683
Q7N7X9	plu0972	26.8411	27.2786	-	27.0467	27.4398	26.9277	0.94724
Q7N3C7	plu2790	27.5801	26.9978	27.5458	27.5937	27.4528	27.3121	0.947186
Q7N895	plu0840	29.4688	30.3964	29.7189	29.8775	29.9535	29.9933	0.945988
Q7N9C0	slyX	26.8731	-	27.2026	27.1035	-	27.1327	0.94589
Q7N7B5	pepD	31.2283	30.3593	31.1166	30.9395	30.9011	31.1046	0.945843
Q7N458	adhE	28.9014	28.3644	28.5565	28.5679	28.7058	28.7919	0.945354
Q7N5K6	fliL	25.6094	-	26.4697	25.7832	-	26.4581	0.945304
Q7N3D4	cspC	32.6221	33.9096	32.2573	33.906	31.815	33.313	0.944985
Q7N5Q3	plu1891	26.3156	26.9984	26.1764	-	26.5443	26.6127	0.94493
Q7N1C8	lysS	30.9095	30.6513	30.9163	30.6653	31.126	30.9316	0.944791
Q7N836	pyrG	30.7173	30.6668	30.7158	30.7438	30.9633	30.6387	0.944767
Q7N360	plu2861	25.6913	-	-	26.0542	-	25.4949	0.943955
Q7MYV7	cysQ	27.3926	28.3177	27.0626	27.4528	27.8636	27.7114	0.942815
Q7N8Q0	dapD	28.8319	29.0025	28.8118	28.838	29.2192	28.8442	0.942737
Q7MY75	wblQ	26.2939	-	26.414	26.7427	26.4002	26.1753	0.942496
Q7N695	plu1666	-	25.3702	-	25.147	25.7649	-	0.942281
Q7N371	dld	28.8234	28.8145	28.4049	28.95	29.007	28.3433	0.942218
Q7MYH4	rpsD	33.5391	33.4323	33.3645	33.5112	33.6413	33.4432	0.941735
Q7N4U6	plu2219	27.8544	28.0322	-	28.2918	28.0727	27.7257	0.941621
Q7MYF7	rpsC	32.7638	32.7859	32.9497	32.8083	33.0425	32.9097	0.94145
Q7N963	thiC	29.3331	29.0271	28.9669	28.954	29.3214	29.3139	0.941233
Q7N6K9	plu1541	29.0739	28.7979	28.3205	28.8479	28.8514	28.7557	0.941085
Q7N6Y7	cysK	31.5138	32.1947	31.6245	32.023	31.8027	31.7727	0.940498
Q7NA90	atpF	30.3578	29.9235	30.3399	30.0723	30.5662	30.2485	0.940446
Q7N028	accC	31.2117	30.8472	31.3338	31.0832	31.3913	31.1842	0.9404
Q7MZ27	pepA	31.4852	31.4714	31.3661	31.2871	31.6927	31.6095	0.940259
Q7N0L6	hupB	-	29.8051	29.9041	29.9841	-	29.9034	0.940083
Q7N5L9	plu1929	-	26.9643	25.7818	26.8212	-	26.1033	0.940063
Q7N0L1	bolA	28.4364	29.4928	28.542	29.2626	28.9067	28.5727	0.93936
Q7N4H5	add	28.4553	29.3107	28.7806	29.1144	28.7925	28.9111	0.939225
Q7N6I0	hisG	25.2258	-	25.6064	25.2339	25.6093	25.6767	0.93917
Q7N2B2	pdxB	-	25.079	-	25.3244	-	25.0149	0.939135
Q7N5I7	plu1961	30.1438	25.2485	27.9829	28.7026	27.2834	27.6619	0.938941
Q7N6W2	gltA	31.8161	32.0121	31.5903	31.6373	32.199	31.8554	0.938822
Q7N647	plu1723	27.7752	26.4436	27.4504	27.8836	26.8896	27.1707	0.938501
Q7N570	plu2087	26.5401	-	26.1844	26.7189	26.2089	26.4344	0.938302
Q7MZU3	plu4181	30.1279	29.8305	30.1433	29.7493	30.4075	30.2208	0.938245
Q7N598	plu2058	32.5791	33.1326	32.8443	33.0563	32.7469	33.0299	0.937961
Q7N596	plu2060	31.9119	31.8944	31.821	32.2889	31.8202	31.7973	0.937547
Q7NAC5	plu0009	25.0086	-	24.693	24.7306	-	25.1575	0.937415
Q7N2S9	cbiE	28.6718	29.1867	29.318	28.9936	28.7996	29.6671	0.936523
Q7N7E0	plu1210	25.611	25.8766	-	25.8093	26.1509	25.5554	0.936423
Q7N2V5	eutA	27.0713	-	26.8341	27.2506	-	26.8448	0.936282
Q7N4V8	hcaC	-	26.1516	-	26.157	26.3365	-	0.936155
Q7MYY8	rbfA	27.9264	28.4356	28.6197	28.4462	28.8075	28.0145	0.935959
Q7N2T5	cbiK	28.3374	27.9906	28.5301	28.2174	28.3614	28.5662	0.935883
Q7MYY7	infB	31.3479	30.9369	31.3346	31.084	31.4446	31.378	0.935779
Q7N5P6	plu1900	29.9422	30.026	30.3025	30.096	30.1444	30.3187	0.935544
Q7N001	ftsE	25.9112	-	25.9896	-	-	26.0466	0.935529
Q7MYF1	rplC	32.7872	33.0102	32.6723	33.1327	33.0019	32.6256	0.935079
Q7N5H9	dsdA	26.4011	26.4966	26.4488	26.3086	26.8686	26.46	0.935059
Q7N0G8	plu3921	27.8996	28.2148	27.9264	27.8099	28.3259	28.1971	0.93474
Q7N9F1	polA	28.4233	27.8467	28.4014	28.4033	28.0316	28.53	0.934442
Q7MYC5	priA	-	-	23.5959	-	-	23.6938	0.934412
Q7N0T2	plu3797	32.5744	31.9087	32.3574	32.183	32.505	32.4528	0.932973
Q7N3Q0	pheS	30.1469	29.7624	30.0198	29.8803	30.369	29.981	0.932755
Q7N0N9	apt	27.3593	27.958	27.6267	28.0374	27.5347	27.6736	0.932636
Q7N9R4	plu0250	30.3357	30.5917	30.3822	30.4126	30.5483	30.6527	0.932175
Q7MY70	wblS	25.0265	25.6566	24.8366	25.9893	25.004	24.8309	0.932087
Q7N0F0	exbD	26.1862	-	26.1814	26.2861	-	-	0.931569
Q7N8N9	bamA	30.2629	30.5986	30.4815	30.4413	30.6944	30.5155	0.931263
Q7MYH1	secY	29.0731	28.0037	28.8905	28.7479	28.786	28.7417	0.93125
Q7N2Q6	plu3020	28.7539	28.6613	29.8117	28.8441	-	29.5135	0.930974
Q7N142	murE	27.4286	27.6025	27.4832	27.464	27.7471	27.6128	0.930944
Q7N039	tldD	29.2871	29.3508	29.1236	29.0757	29.5142	29.4822	0.930742
Q7MYH6	rplQ	31.7525	30.8085	31.23	31.3433	31.5519	31.2087	0.930243
Q7N3M3	yebF	27.4832	-	-	-	27.5883	27.5878	0.929895
Q7N0E1	parC	26.6581	25.9349	25.6981	26.4924	26.2285	25.8859	0.929655
Q7MZY5	plu4122	25.1397	-	-	25.4762	-	25.0147	0.929318
Q7MZU8	plu4176	26.6465	27.536	-	26.8655	27.5293	-	0.929061
Q7N6F3	cydD	23.6691	-	-	23.7753	-	-	0.929032
Q7N5J1	putA	31.8062	31.0972	31.6025	31.4613	31.6717	31.692	0.92892
Q7N9V1	plu0210	29.2548	28.7436	29.3417	29.1607	29.3329	29.1657	0.928914
Q7N765	plu1293	24.1359	-	-	-	24.2428	-	0.928575
Q7N0K1	plu3881	30.5967	30.3244	30.262	30.6159	30.5026	30.3859	0.928491
Q7MYG0	rpsQ	29.1557	-	31.3939	29.4956	-	31.2699	0.927912
Q7N510	hrpA	26.0553	26.1517	26.3456	26.1335	26.2526	26.4914	0.927655
Q7N0K6	cyoB	29.2173	29.5363	29.3855	29.3924	29.7105	29.3613	0.927653
Q7N4A5	plu2444	31.3745	32.2284	31.6257	31.6524	32.0415	31.8601	0.927571
Q7N9Z8	plu0153	-	-	26.7261	-	-	26.8352	0.927166
Q7N6U7	plu1441	27.7756	27.9697	28.0718	28.1313	28.1218	27.8922	0.926993
Q7N8W3	dapB	26.9827	26.7879	26.8502	26.8428	26.9695	27.1388	0.926541
Q7N3D6	fbaB	31.4557	31.919	31.6229	31.7431	31.5822	32.0027	0.926485
Q7N0D7	nudF	26.5113	-	26.2199	26.0691	-	26.8834	0.926142
Q7MZ46	plu4457	26.0992	25.9057	26.1884	25.7277	26.2857	26.514	0.925721
Q7N1R0	plu3411	27.9397	27.1068	27.0964	27.2242	27.9071	27.3464	0.925561
Q7N7W3	hpcC	31.2841	31.4377	31.0897	31.0705	31.6571	31.4188	0.925548
Q7N809	gloB	26.9223	27.3479	26.76	27.0506	27.1145	27.2014	0.925262
Q7MBA6	acs	26.6378	-	26.8038	26.5305	27.0713	26.8969	0.925242
Q7N4V3	plu2212	27.5955	27.9644	27.7553	27.9158	27.9173	27.8185	0.92523
Q7N8Y3	dnaJ	30.4724	30.4936	30.5929	30.2782	30.9569	30.6605	0.925151
Q7N4J2	plu2345	26.3391	25.6212	26.5606	26.4483	26.1083	26.3024	0.924856
Q7N0I6	secF	27.6206	27.1405	27.4384	27.5134	27.4835	27.543	0.924377
Q7N3K3	guaB	31.7411	31.3126	31.807	31.4947	31.8653	31.8427	0.924008
Q7N4U4	plu2221	29.6373	29.9852	29.4856	30.0251	29.8749	29.5505	0.923931
Q7N7G9	plu1180	25.5212	-	-	25.7579	-	25.5129	0.923898
Q7N202	glnB	27.5943	28.0157	27.6902	27.9751	27.9131	27.756	0.923564
Q7N614	plu1762	27.8298	27.7514	27.7866	27.9642	27.9739	27.7738	0.923555
Q7MYY9	rpsO	30.763	31.507	30.9473	31.4253	30.7992	31.338	0.923346
Q7MZA2	iclR	26.7264	27.0635	26.9342	27.6791	26.9978	26.3944	0.922907
Q7N793	pheA	27.3186	-	27.1992	27.7303	27.0153	27.3797	0.922612
Q7MYN3	cyaY	27.7476	27.826	27.1931	27.8265	27.7747	27.5162	0.922139
Q7N364	nfo	27.432	27.5356	27.2595	27.4576	27.3483	27.7737	0.921786
Q7N196	visC	24.9435	24.7194	24.1834	24.733	-	-	0.921705
Q7N405	plu2552	31.1373	31.0568	30.9783	31.1063	31.6306	30.7887	0.921647
Q7N1E4	plu3532	26.7158	-	27.0246	-	-	26.9886	0.921231
Q7MBH1	ispA	25.9875	-	-	26.4399	-	25.7722	0.921132
Q7MZT7	plu4187	29.3119	-	26.6656	27.8666	28.607	27.8489	0.921007
Q7N9P0	plu0277	26.8628	28.1782	26.8591	27.6495	27.8953	26.7133	0.9206
Q7N391	tmk	24.7882	-	24.9354	24.9814	-	-	0.920446
Q7N7W1	hpaG1	29.3301	29.269	28.9564	29.509	29.4147	28.9911	0.920345
Q7N8Z9	rob	26.773	27.1952	27.0101	27.4052	26.8152	27.1197	0.919807
Q7N2A2	plu3186	-	26.0804	26.0276	25.9692	-	26.3813	0.919381
Q7N3K4	guaA	30.7536	31.1259	30.3594	31.1117	30.8651	30.6258	0.91938
Q7MYL4	rho	30.9393	30.4361	30.8102	30.8357	30.8627	30.8518	0.919231
Q7N3V9	plu2604	30.5776	29.562	30.3431	30.0674	30.132	30.6488	0.919021
Q7MZH4	plu4313	30.3011	29.9545	30.2635	30.2606	30.3449	30.2791	0.919019
Q7N3G0	celF	28.1648	29.1434	28.8511	28.792	28.6132	29.1208	0.918764
Q7MZM5	plu4258	30.3529	30.6292	30.197	30.5932	30.6674	30.286	0.918592
Q7N4B5	cysB	29.874	30.0803	30.3088	30.0016	30.3836	30.2455	0.91858
Q7N6J4	udk	27.0854	26.0638	26.9882	26.729	26.8505	26.9257	0.918514
Q7N2C0	ubiX	-	-	25.4062	-	-	25.5289	0.918454
Q7N9N5	plu0282	27.8737	28.0225	27.5206	27.9574	27.9506	27.8773	0.91837
Q7MYH2	rpsM	32.4747	32.496	32.1575	32.3541	32.7542	32.3903	0.917975
Q7N4K6	plu2325	30.7198	31.6813	30.3892	30.9928	31.204	30.9646	0.917833
Q7N565	argS	29.3669	29.6474	29.3113	29.4208	29.5551	29.7212	0.917757
Q7N547	ruvB	25.4701	24.7307	25.4184	25.3054	25.3147	25.3711	0.91764
Q7MZD2	qor	30.6523	31.2017	30.5843	30.8471	31.1923	30.7711	0.917595
Q7N9Y1	uxuA	25.6623	26.0068	25.4252	25.8029	25.792	25.8731	0.917299
Q7N8P7	rpsB	32.2144	32.5921	32.2797	32.345	32.497	32.6191	0.917038
Q7N934	plu0518	25.5966	26.15	25.8351	25.8272	25.7859	26.3481	0.916074
Q7N3X0	fabI	32.7945	33.3969	33.0954	32.9355	33.6287	33.1034	0.915761
Q7N829	plu0919	28.8186	29.8807	29.5914	29.6345	29.6233	29.4173	0.915032
Q7N0H0	plu3918	28.6546	28.4615	28.9696	28.4716	28.6669	29.3322	0.9149
Q7N834	plu0914	28.3347	27.9541	28.0861	28.3598	28.127	28.2742	0.914674
Q7N448	plu2506	25.914	26.4477	-	-	26.3095	-	0.914652
Q7N9F3	plu0383	29.0891	28.3439	28.6965	28.9226	28.5704	29.0227	0.914647
Q7N6F6	clpA	27.4829	28.0054	27.7636	28.1162	27.7689	27.7537	0.91452
Q7N745	nagC	25.6496	25.6097	25.5371	25.6175	25.838	-	0.914517
Q7MAX2	rph	-	26.5946	26.5246	-	26.9399	26.4381	0.914237
Q7N828	plu0920	-	26.3528	-	26.4825	-	-	0.914028
Q7N2T7	cobQ	28.4956	28.9059	28.8654	28.7796	28.853	29.0234	0.914011
Q7N9X3	eda	25.9692	-	25.5682	25.8417	-	25.9558	0.913812
Q7N2N5	paaK	29.0903	28.4453	28.7762	28.912	28.902	28.8906	0.913249
Q7N5R1	plu1883	31.715	31.6207	31.628	31.5513	31.9947	31.8113	0.91308
Q7N957	dbhA	30.611	-	31.125	30.2689	31.7492	30.981	0.912752
Q7N121	speA	27.0455	27.3282	27.0569	27.5402	26.731	27.5549	0.912667
Q7N5I9	xylB	-	25.5695	-	-	25.7016	-	0.912553
Q7MYD5	argE	28.1856	28.0422	27.872	28.2034	28.1659	28.1289	0.912074
Q7NA32	plu0113	29.6719	30.4231	29.9242	29.9688	30.249	30.2005	0.911929
Q7MZB2	dltC	-	-	27.0747	27.0449	27.32	27.2637	0.910765
Q7N6N3	plu1513	27.8833	28.5847	27.8051	28.3203	28.2276	28.1317	0.910373
Q7MBA4	plu0240	26.6983	-	26.8099	26.8856	26.9645	26.8199	0.91008
Q7N9L5	plu0307	-	27.2836	-	27.4205	-	-	0.909433
Q7N838	relA	27.3785	26.6399	27.1601	27.2628	26.9828	27.3471	0.908726
Q7N611	uup	26.3304	26.0287	26.2115	26.1419	26.668	26.1765	0.9084
Q7N1U8	ung	27.7133	29.1835	28.6202	28.7687	28.438	28.7275	0.908119
Q7N9R2	plu0252	26.7488	26.4457	-	26.7172	26.8126	26.6807	0.907776
Q7N3S9	plu2634	26.3758	26.7329	26.4735	26.5686	26.5856	26.8468	0.907758
Q7MB92	thiF	26.7989	27.3164	27.6874	27.0833	27.5688	27.5712	0.907383
Q7N5A2	ychF	29.2792	28.3827	29.3198	29.0503	29.2725	29.0801	0.907265
Q7N8Q2	plu0667	26.9311	26.5294	-	-	26.8714	-	0.906809
Q7N7Z6	epd	27.1269	27.4134	27.5831	27.8201	27.5016	27.2252	0.906802
Q7N782	emrA	26.6914	26.2789	27.1592	26.5258	27.2033	26.8251	0.906532
Q7N287	fadI	25.7246	-	25.9151	25.8276	26.0794	25.9811	0.905738
Q7N7B0	aroL	-	26.0301	25.6706	-	26.0793	25.9075	0.905618
Q7N574	luxB	30.2772	29.5589	29.0628	29.7435	30.0556	29.529	0.905607
Q7N2J7	nuoL	-	26.7244	-	-	26.8682	-	0.905138
Q7N9P3	rpoZ	29.094	28.8859	29.2101	29.2456	29.2605	29.1181	0.904547
Q7N0G3	plu3926	27.5876	-	26.761	26.8805	27.8614	27.2157	0.90445
Q7N7W7	gabD	30.5703	30.6897	30.79	30.6197	30.9657	30.8998	0.904323
Q7MYJ4	ilvE	29.6821	29.306	29.1132	29.1296	29.9254	29.4825	0.904135
Q7N6V9	sdhA	30.1404	29.6525	30.1086	29.956	30.364	30.0218	0.90326
Q7N705	hisS	29.0988	29.4904	29.1354	29.1213	29.4852	29.5586	0.90326
Q7N9A9	nusG	29.6617	29.4712	29.2695	29.6374	29.8724	29.3332	0.903206
Q7N6D4	cmk	27.9777	28.1344	28.0698	27.6806	28.3068	28.6353	0.903168
Q7N4Z7	plu2163	29.2578	29.163	28.9243	29.31	29.3124	29.1639	0.903074
Q7N1E9	plu3527	26.338	24.9562	25.1425	25.5365	26.2114	25.1312	0.902816
Q7N542	pykA	31.6967	31.9053	31.752	31.8192	31.999	31.9818	0.902082
Q7N0L7	ppiD	30.7164	30.0719	30.7252	30.4424	30.764	30.7546	0.901784
Q7N0N5	plu3846	25.8734	-	-	26.0678	26.2237	25.7784	0.901288
Q7N0R9	plu3812	26.2477	27.6978	26.3203	27.1772	26.8186	26.72	0.901271
Q7N5X5	plu1804	29.7255	29.7755	29.5592	30.1271	29.7569	29.6322	0.900006
Q7N590	prs	30.6666	30.3726	30.656	30.5695	30.9048	30.6785	0.899698
Q7MYF0	bfr	27.9352	26.4431	27.1151	27.413	27.1924	27.3456	0.899636
Q7N515	ldhA	26.838	27.298	26.6339	26.7623	27.3509	27.1169	0.899112
Q7N1B8	plu3558	29.0155	28.9255	29.2595	29.0386	29.2837	29.3391	0.898957
Q7N764	dacA	28.5606	28.2415	28.6228	28.2621	28.7808	28.8437	0.898828
Q7MYY0	rlmE	27.1367	26.6089	27.0363	27.0599	27.272	26.9117	0.898824
Q7N747	plu1311	28.5561	28.1585	27.6037	28.3591	28.3036	28.1222	0.897798
Q7N626	plu1749	27.7933	28.0106	27.6933	28.3324	27.4899	28.1428	0.897539
Q7N079	rpsI	31.3533	31.5215	31.7977	31.9568	31.6233	31.5628	0.896975
Q7N0L0	plu3872	27.8845	27.9637	28.1957	-	28.2725	28.0728	0.896268
Q7N8N1	accA	30.543	30.4273	30.6734	30.5721	30.7726	30.7732	0.896221
Q7N5X4	plu1805	30.212	30.4516	30.2843	30.8289	30.3776	30.2158	0.896176
Q7N6V4	sucD	31.0069	30.7707	31.1577	30.9399	31.2145	31.2601	0.895205
Q7N464	oppD	27.2488	27.9421	26.2724	27.1776	27.4065	27.3586	0.895151
Q7N4V1	plu2214	30.9459	30.3832	31.1056	30.9484	30.5691	31.3969	0.895079
Q7N0M7	tesB	-	25.3886	26.0389	-	-	25.8755	0.893937
Q7N9T4	yihI	-	26.6193	26.3505	26.7613	26.7586	26.4205	0.893868
Q7N2I1	ackA	30.3155	29.91	29.5747	30.3299	30.0337	29.9227	0.893769
Q7N4L5	plu2316	26.741	27.1	26.9654	27.0309	27.0639	27.199	0.893494
Q7N4R5	plu2257	-	-	28.0944	28.5289	-	27.9862	0.89307
Q7MZX5	fxsA	25.9437	26.8909	-	26.4874	26.6975	26.5567	0.89299
Q7MYM0	rffH	26.1755	26.9353	26.6721	26.5001	26.757	27.0167	0.892782
Q7N3K0	ptrB	25.976	26.9648	27.0617	26.2266	26.8753	27.3923	0.892619
Q7N1G5	lip-1	29.0492	28.6898	29.1313	29.2577	29.1345	28.9698	0.892599
Q7N6Y0	glk	25.8621	26.6671	-	26.4525	26.1865	26.6521	0.891456
Q7MB54	ybhG	28.4362	27.7841	28.5369	28.2522	28.5739	28.4305	0.891022
Q7N2J4	nuoI	27.8922	27.274	27.3743	27.6493	27.844	27.5489	0.890543
Q7N149	ddl	27.8212	27.8238	27.3469	27.7624	28.1735	27.5587	0.89036
Q7N8M7	proS	29.6178	29.7589	29.8257	29.9146	29.7267	30.0645	0.890197
Q7N2I9	nuoC	30.6816	30.1337	30.6213	30.6404	30.5788	30.7221	0.889946
Q7N8K0	mutS	27.7482	26.7928	27.3961	27.5182	27.278	27.6468	0.889679
Q7N931	deoB	29.8578	29.951	29.5021	29.7465	30.0812	29.9906	0.889387
Q7N798	rplS	31.2961	31.2503	31.1089	31.6443	31.1367	31.3837	0.888978
Q7N960	hemE	26.9188	26.717	26.8797	-	27.3382	26.6802	0.888405
Q7MZB7	plsB	26.2913	27.0715	26.8971	27.0146	26.9312	26.8265	0.888366
Q7N6V5	sucC	31.8032	31.677	31.6995	31.7584	32.0213	31.9126	0.888315
Q7N3I7	entE	29.8822	29.6266	29.612	29.9158	29.7361	29.9821	0.888157
Q7N0I1	ahpC	32.78	33.0552	32.9525	32.8158	33.3771	33.1088	0.887999
Q7N6E0	plu1615	26.9381	-	26.579	26.6262	-	27.2337	0.887993
Q7N3A4	mfd	25.8536	25.8009	-	25.8851	-	26.1134	0.887596
Q7N0Y1	plu3748	30.7437	30.1585	30.6658	30.389	31.1034	30.5922	0.887503
Q7MYG6	rplF	32.8654	32.7554	32.6426	32.8702	33.0166	32.8935	0.887425
Q7MY49	plu4844	32.4948	32.7121	32.7382	32.7889	32.9073	32.7671	0.887185
Q7N1C0	plu3556	28.1541	28.2137	27.8049	28.3812	28.1784	28.1313	0.887168
Q7N0J3	plu3894	26.2869	-	25.8497	26.1386	-	26.3443	0.886873
Q7MYG1	rplN	31.9866	31.7055	31.6404	31.9782	31.8649	32.0121	0.886244
Q7N0Y6	wzc	27.9936	26.9372	27.3782	27.8026	27.3735	27.6557	0.886238
Q7N865	dksA	28.7803	28.762	28.9926	28.563	29.2849	29.2135	0.885454
Q7N609	pqiB	26.3332	25.8269	26.5681	26.561	26.4886	26.2064	0.88517
Q7N7W4	hpcB	29.9902	29.6101	29.8218	29.8387	30.0893	30.0223	0.885109
Q7N2C2	plu3164	30.4209	30.6767	30.6373	30.7072	30.3303	31.2259	0.885064
Q7N7H2	plu1177	26.6842	-	-	27.2415	26.4808	-	0.884565
Q7N0G0	rdgC	29.1751	28.1442	28.6293	28.8096	28.9952	28.681	0.883274
Q7N3B2	phoP	26.2568	27.003	26.415	27.0121	26.5563	26.6455	0.88288
Q7N7Z5	pgk	32.4248	32.3729	32.3584	32.3691	32.8787	32.4478	0.882819
Q7N336	plu2886	-	-	25.4134	-	-	25.5942	0.882208
Q7N1X5	rnc	-	-	26.1054	-	-	26.2864	0.88214
Q7N3P9	rplT	31.6152	30.6624	32.2388	31.8827	31.8849	31.2924	0.881963
Q7MY91	wblB	29.2386	29.2561	29.1749	29.3024	29.5982	29.313	0.881894
Q7MZA5	plu4388	27.3758	-	27.2381	27.2728	27.4297	27.7628	0.881799
Q7N5X8	plu1801	29.0665	25.8563	28.7783	27.8559	27.8958	28.4945	0.881641
Q7N2N4	plu3042	28.656	27.6633	27.7446	28.1426	28.3012	28.1677	0.881138
Q7MYE0	oxyR	-	25.6609	25.556	-	25.9195	25.6644	0.880573
Q7N408	xthA	26.2431	-	25.9315	-	-	26.2719	0.879884
Q7MYG4	rpsN	30.6791	30.7742	31.4387	31.0312	31.5293	30.8856	0.87984
Q7N1U2	plu3377	24.531	24.772	-	24.7354	24.9374	-	0.879692
Q7N7F7	gmhA	29.6703	29.8785	29.5107	29.6783	29.8071	30.1295	0.879558
Q7N0T6	plu3793	28.6422	28.6521	28.2673	28.4467	28.7453	28.9274	0.879082
Q7N6I6	hisI	26.1633	-	25.3653	25.6994	-	26.2049	0.87791
Q7N8Q7	queF	27.6555	27.9495	27.6372	27.7613	27.9227	28.1237	0.877548
Q7MZU7	plu4177	-	-	24.8401	-	-	25.0288	0.877396
Q7N3B3	purB	29.7398	28.8551	29.5247	29.4735	29.7224	29.4931	0.876727
Q7N2J2	nuoG	29.9482	30.0331	30.1887	29.911	30.5176	30.312	0.876511
Q7N3Y1	plu2581	25.4863	25.4915	25.4978	25.6593	25.7743	25.6139	0.876227		+
Q7N0P8	gsk	25.1212	-	-	25.3367	-	25.2897	0.875413
Q7N2B5	accD	30.2049	29.8688	30.2934	29.9184	30.7464	30.2794	0.875163
Q7N6V7	sucA	30.6032	30.485	30.6528	30.6756	30.8218	30.8227	0.874765
Q7N0T0	atoD	25.3315	24.7752	25.4784	25.2346	-	25.5416	0.874758
Q7N2S8	cbiD	28.6739	28.8912	29.2382	29.0234	29.2146	29.1487	0.87392
Q7MYX3	ispB	26.4158	-	25.9014	26.4209	26.2368	26.4032	0.873596
Q7N7A0	rpsP	31.1845	31.035	31.3333	30.6932	31.6169	31.8285	0.873417
Q7N7A4	gshA	27.625	26.9421	26.6775	27.4928	27.3132	27.0253	0.87323
Q7N0N0	acrB	29.7605	29.5426	29.8726	29.9468	30.1282	29.6879	0.873135
Q7N517	plu2143	30.0908	30.4955	29.6563	30.3711	30.7119	29.7481	0.872887
Q7NAC3	plu0011	25.4756	25.0671	24.6648	25.3697	25.2812	25.1454	0.872822
Q7N9S6	glnA	29.3394	29.0179	28.6795	29.098	29.4461	29.0827	0.872588
Q7MZF7	adhC	29.734	29.6669	29.6021	30.2629	29.5544	29.7765	0.872393
Q7MZE1	psuG2	26.023	26.4969	25.8922	26.5969	26.3757	26.032	0.87206
Q7N2H0	astB	-	-	25.2858	25.4835	-	-	0.871994
Q7N6Y9	ptsI	28.6405	28.2846	28.1898	28.3706	28.8008	28.54	0.871293
Q7NA61	trpS	29.4195	29.2251	29.3664	29.5591	29.4122	29.6377	0.870957
Q7N0R4	ybbA	25.3035	-	25.2851	25.9458	25.1883	25.3469	0.870928
Q7N5A1	pth	-	-	25.2086	-	-	25.4082	0.870816
Q7N3L8	manX	28.8947	29.6374	29.4165	29.5353	29.6013	29.4174	0.869485
Q7N2D5	lsrG	26.808	-	26.4687	-	-	26.8407	0.86911
P67903	rpsJ	32.7966	32.0996	32.6386	32.4706	32.9968	32.6752	0.868979
Q7N036	cafA	24.9604	-	24.8146	24.5781	25.1791	25.5152	0.868531
Q7N320	plu2903	29.2601	29.9119	29.7267	30.2072	29.7181	29.5865	0.867892
Q7N4Z6	plu2164	32.7584	32.5085	32.5368	32.6802	32.9672	32.7696	0.867884
Q7N5Y5	plu1794	29.027	27.8927	28.5839	29.0505	28.7121	28.3554	0.867647
Q7MYB1	pfkA	29.2721	28.7095	28.667	29.0211	29.4012	28.8411	0.867585
Q7MYU9	rplI	32.8025	32.4668	32.7123	32.7139	32.994	32.8889	0.867501
Q7N1X8	pdxJ	28.29	28.5447	28.718	29.0321	28.3411	28.7962	0.867186
Q7N5F0	plu2002	25.3029	-	25.3256	-	-	25.5201	0.867025
Q7N4J6	plu2341	27.3325	27.2785	27.5488	27.4426	27.9788	27.3594	0.866337
Q7N3N2	proQ	29.6332	29.0604	29.4558	29.7119	29.6621	29.403	0.865035
Q7MYS6	psd	27.2827	27.4125	27.2066	27.4653	27.8022	27.2622	0.864935
Q7N4M1	plu2305	25.6036	-	25.5758	25.5013	-	26.0976	0.864681
Q7N0K7	cyoA	30.5779	30.613	30.6052	30.769	30.6969	30.9684	0.862919
Q7MBH2	ligA	27.9197	26.741	27.9213	27.2319	27.8713	28.1172	0.862865
Q7NAB2	plu0022	25.2123	24.8651	24.9802	25.3435	25.5302	24.8239	0.862558
Q7N486	trpB	33.7341	32.9048	32.9669	33.3606	33.5272	33.3585	0.862444
Q7MZX7	plu4132	27.7171	27.7603	-	27.9529	-	-	0.861979
Q7N873	yadG	25.2266	25.7902	25.2882	25.9605	-	25.3395	0.861519
Q7N5Y3	plu1796	28.8262	29.1742	28.6495	29.3037	29.0428	28.9512	0.860995
Q7MZK0	feaB	33.1749	33.2462	33.0923	33.2201	33.6067	33.3445	0.858948
Q7N051	rnk	27.4936	28.4269	-	27.5078	28.5222	28.5095	0.858831
Q7NA21	plu0126	25.9042	25.7347	24.6179	-	-	25.6394	0.858312
Q7MZ83	ubiB	24.6044	24.5984	24.9447	24.8014	24.8247	25.1843	0.857982
Q7N6N7	ybhF	25.3922	-	-	25.6132	-	-	0.857982
Q7N8V6	pdxA	24.7722	25.163	24.9604	25.5578	24.779	25.2242	0.857489
Q7N4D7	plu2404	30.2192	29.6692	29.7361	29.9835	30.4417	29.868	0.856843
Q7N5N0	flgE	28.8454	28.0732	28.049	28.5143	28.3638	28.7616	0.856143
Q7N8K4	surE	26.1141	25.68	25.6628	25.9648	26.2876	25.877	0.856083
Q7MYG5	rpsH	32.1827	31.5408	32.1719	31.819	32.3873	32.3623	0.855951
Q7MYI0	rsmB	24.7628	-	-	24.9884	-	-	0.855251
Q7MZY4	frdA	29.9194	29.6413	29.9436	30.046	30.1385	29.9993	0.854726
Q7N770	ogt	26.7239	28.0206	26.9763	27.5385	27.6828	27.1796	0.854605
Q7N3N7	plu2678	25.863	-	-	26.0333	-	26.1475	0.854149
Q7N406	selD	28.914	28.5606	28.6501	28.7312	29.0613	29.0146	0.854122
Q7N9G2	rlmJ	27.7255	27.841	28.3199	28.2735	27.4425	28.8543	0.853871
Q7N5K3	fliI	25.6473	25.1569	25.2824	25.773	25.5302	25.4674	0.85382
Q7MYG2	rplX	31.9308	31.915	32.097	32.1944	32.2309	32.2016	0.853796		+
Q7N6H4	cipA	31.3332	32.7168	32.9714	31.8906	32.8097	33.0079	0.853281
Q7NA59	rpe	29.0642	28.7588	29.5711	28.9122	29.4738	29.6982	0.852625
Q7N2V3	eutC	27.4459	26.9397	27.5791	27.2272	27.7834	27.6445	0.852544
Q7MZN3	prfC	26.0202	26.5278	26.1578	26.1587	26.5204	26.7172	0.852497
Q7N9C2	yheS	27.8138	27.0733	27.4014	28.0262	27.4608	27.4933	0.852257
Q7N0P1	plu3840	27.6029	-	27.3443	27.6423	27.9832	27.491	0.851516
Q7MY53	secB	30.1346	30.8446	-	31.0293	30.2642	30.8728	0.851139
Q7N4A6	plu2443	31.1572	31.8861	31.2989	31.8294	31.8188	31.3922	0.851033
Q7N7W5	hpcD	28.7882	29.0474	28.6457	29.0782	28.9215	29.1814	0.850714
Q7N2M4	nrdA	29.8298	30.1994	30.0252	30.3813	30.318	30.0549	0.85071
Q7N2I6	lrhA	27.7157	28.5151	28.0165	28.1008	28.6169	28.2299	0.850591
Q7N6L0	moeA	27.4561	27.4515	26.5721	27.6687	27.3562	27.157	0.850219
Q7MZJ6	iunH	32.4937	32.5539	32.5007	32.5365	32.9838	32.7303	0.850215
Q7N6C6	msbA	26.5378	26.1913	25.9618	26.5107	26.32	26.5643	0.84987
Q7N2B9	purF	29.017	28.9327	28.8568	29.0912	29.3098	29.1106	0.849659		+
Q7NA09	plu0139	27.7477	-	-	27.983	-	-	0.849455
Q7N4J3	plu2344	-	-	26.1679	25.8472	26.6827	26.6811	0.849239
Q7N3S6	plu2637	-	-	24.3028	24.54	-	-	0.848408
Q7N2T3	cbiH	28.8396	-	29.2477	29.4287	-	29.1354	0.847676
Q7MYU2	hflK	30.8796	30.7661	30.4262	30.6778	31.2106	30.8995	0.84752
Q7MZ74	metE	32.1772	31.6745	32.3539	32.1346	32.3514	32.437	0.847254
Q7N057	yhbG	26.9223	26.9888	27.2618	27.1263	27.2909	27.4734	0.847195
Q7MY29	rpmB	31.0568	30.4185	31.6965	31.7397	30.9848	31.1657	0.847037
Q7MYW1	msrA	27.229	27.3174	27.046	27.0919	27.7828	-	0.846816
Q7N6Z1	cysM	25.1744	25.6209	25.0383	25.6309	-	25.4068	0.846178
Q7N3M6	ftnA	32.1433	32.965	32.6097	32.5612	33.0177	32.8678	0.845053
Q7MY65	wblX	27.0072	-	26.4837	-	-	26.9884	0.845042
Q7N061	plu4036	27.6609	27.6158	26.3172	27.4558	27.5821	27.2922	0.843558
Q7N0R0	plu3821	28.1629	28.6065	28.8449	29.1314	28.1961	29.0236	0.843467
Q7N0C3	hldE	28.188	27.8982	27.5713	28.2641	28.1643	27.968	0.843044
Q7N9H3	plu0363	27.9792	25.5046	25.7493	26.6373	25.7528	27.5834	0.842789
Q7N877	plu0864	25.2495	26.1041	25.9505	26.3669	25.6972	25.9833	0.842205
Q7N4I1	tus	-	-	23.6302	23.9432	-	23.8128	0.842174
Q7MY84	wblH	31.1133	30.5248	30.8912	31.2594	30.9736	31.0401	0.84211
Q7N575	luxA	29.0167	28.7839	28.0714	29.2534	29.0764	28.2876	0.841791
Q7N3W6	tyrS1	29.4652	28.7839	29.2965	29.2182	29.5195	29.5579	0.840879
Q7N3L7	manY	27.2234	28.2594	-	27.9698	-	28.0136	0.840745
P60092	prmA	26.8682	-	26.4354	26.064	27.1492	27.4933	0.840676
Q7N0D6	tolC	30.724	31.0139	30.7913	30.9402	31.1303	31.2106	0.840551
Q7N3J5	plu2721	26.4079	26.3777	27.1331	26.5689	26.9812	27.1217	0.840296
Q7N5A9	plu2046	29.4294	29.2045	29.7876	29.7458	29.7487	29.6806	0.840197
Q7N5D2	plu2022	28.9385	29.8008	28.716	29.3041	29.2758	29.6293	0.840133
Q7N0S5	cysS	28.3568	28.3533	27.4084	28.4431	28.2665	28.1702	0.838715
Q7N2F7	plu3123	31.0648	29.5776	30.8846	30.5062	30.7749	31.0077	0.838611
Q7N3Q1	pheT	30.1295	30.1713	30.1413	30.2579	30.342	30.6041	0.838588
Q7N8M8	cutF	27.8848	28.0821	27.7766	27.8263	28.337	28.3424	0.838516
Q7N5D7	plu2016	31.4389	32.057	32.1171	31.9646	32.0876	32.3249	0.83813
Q7N3U9	plu2614	26.5239	-	26.1679	26.4943	26.4598	26.8525	0.837271
Q7MXZ6	plu4903	27.3213	26.7925	27.7189	27.2516	27.703	27.6516	0.836355
Q7N4D3	plu2408	28.5735	27.5456	28.7475	28.5046	28.4687	28.6722	0.835296
Q7N6L4	plu1536	-	-	25.6912	-	-	25.951	0.835175
Q7MZA3	plu4390	-	24.2229	-	24.4829	-	-	0.835076
Q7MZL0	plu4273	24.9009	-	-	25.0968	-	25.2259	0.834851
Q7N2S7	cbiC	28.8512	29.1945	28.4242	29.0609	29.2642	28.9302	0.834056
Q7NA60	plu0085	-	-	26.6505	-	-	26.9126	0.83385
Q7N651	plu1718	28.6434	27.3649	27.6958	27.7565	28.676	28.0598	0.833501
Q7MYB8	zapB	31.0428	31.0064	-	31.442	30.8863	31.5419	0.831904
Q7MYW9	mdh	32.3534	32.9499	32.4402	32.9521	32.9305	32.6581	0.831799
Q7N5T3	plu1854	28.9315	28.1109	29.1207	28.6682	28.8683	29.4241	0.831728
Q7M7H8	gshB	27.1092	28.8295	28.3716	28.3601	28.511	28.2378	0.831501
Q7MYZ2	deaD	28.7301	28.4267	28.7077	29.1289	28.768	28.7733	0.830165
Q7N8V1	rapA	27.9346	26.9652	27.4319	28.3067	26.6874	28.1445	0.829914
Q7N3A2	plu2817	27.8714	28.2965	27.7591	28.046	28.9673	27.727	0.82868
Q7MXZ4	yidC	27.1772	27.1103	27.4485	27.8269	27.414	27.3088	0.828624
Q7N8X3	ribF	25.25	-	25.1961	25.5363	-	25.4527	0.828504		+
Q7N709	rlmN	-	-	24.4045	-	24.676	-	0.828429
Q7N2S5	cbiA	25.6334	26.2603	-	26.0102	-	26.4271	0.828308
Q7N9L1	plu0311	30.0392	30.5236	30.4754	30.6016	30.7363	30.5188	0.827685
Q7MZ14	pyrI	27.6172	-	27.1056	27.793	27.5921	27.5177	0.827682
Q7MZH5	plu4312	25.7684	26.0162	26.1709	25.9	26.4357	26.4391	0.827528
Q7N162	nadC	27.5983	27.1532	27.1041	27.4995	27.9824	27.1946	0.827243
Q7N409	plu2548	30.0518	29.7566	29.8802	29.9964	30.5957	29.9175	0.827213
Q7N200	plu3311	28.5081	27.5509	28.4421	28.2252	28.7088	28.3903	0.826798
Q7NAB9	plu0015	29.505	29.5067	29.5556	29.6089	29.9232	29.8597	0.82655		+
Q7N119	metK	30.1202	29.8944	30.0152	30.3142	30.4919	30.049	0.826397
Q7N395	lpoB	26.6098	26.456	26.5573	26.9079	26.9685	26.5742	0.825967
Q7N990	plu0453	-	24.5479	24.5544	-	24.945	24.7137	0.824636
Q7N1X4	lepB	28.1608	27.6391	28.1786	28.5885	27.9577	28.2677	0.824486
Q7N5X2	plu1807	25.6534	-	25.2431	26.0383	25.4832	25.6597	0.824247
Q7N5E4	plu2008	29.3536	30.4942	29.3551	29.9982	30.1424	29.9007	0.823916
Q7N823	plu0925	27.8769	29.9535	29.1799	29.3166	29.4394	29.0972	0.823045
Q7N6E8	plu1603	27.5462	27.7131	27.2499	27.7946	27.7381	27.8235	0.822266
Q7N465	oppF	26.4562	26.2768	26.4604	26.7402	26.5818	26.72	0.821962		+
Q7N5J0	putP	27.2491	-	27.3718	27.7243	-	27.4638	0.821521
Q7MYI2	def	26.734	27.6202	26.6047	27.4332	27.0889	27.297	0.819767
Q7MZ91	fadA	28.2379	28.2218	28.4182	28.275	28.7914	28.6717	0.81976
Q7N9W8	plu0192	25.2269	25.6844	-	25.8987	25.5861	-	0.819752
Q7N043	pmbA	30.1036	28.777	30.0226	29.7847	29.9982	29.9815	0.819559
Q7N3T8	plu2625	25.2268	-	-	25.4085	-	25.6247	0.818064
Q7MY45	rfaF	25.4423	-	-	-	-	25.7339	0.816978
Q7N068	murA	26.7794	26.5996	26.7593	27.063	27.0203	26.9302	0.816914		+
Q7N9R6	gltS	25.9046	-	25.8122	-	-	26.1505	0.816718
Q7N286	fadL	29.2789	-	29.078	29.648	29.7102	29.0536	0.816687
Q7NAD3	dnaA	27.6741	26.4085	26.9604	27.4192	27.252	27.2515	0.81608
Q7N128	leuB	27.6651	25.8397	27.1285	27.6372	27.0593	26.8169	0.815986
Q7N0H6	sbcD	24.1566	-	23.4605	24.1796	23.9539	24.175	0.815464
Q7N787	pssA	28.0729	27.2479	27.9235	28.0949	27.7135	28.3205	0.815155
Q7N8S4	argA	26.0996	26.2312	27.1595	-	-	26.7932	0.814286
Q7N6F2	trxB	29.4243	30.2637	29.3902	30.1202	29.9509	29.8972	0.814141
Q7N4C9	plu2412	29.4132	30.1268	29.422	30.3751	29.4981	29.9794	0.814028
Q7N6L2	ybiT	28.7276	28.545	28.6061	29.0499	28.7128	29.012	0.813035
Q7N5D8	plu2015	28.7193	28.437	28.5579	28.7539	29.0565	28.8016	0.812673
Q7N6F0	ftsK	-	-	23.7109	-	-	24.011	0.812196
Q7N2T4	cbiJ	29.6813	30.0823	30.223	30.2665	30.3057	30.3148	0.812168
Q8KM01	luxS	32.1518	32.2709	31.5002	32.0595	32.4028	32.3631	0.811778
Q7N6N5	rhlE	26.6355	26.1416	26.1851	26.5163	26.574	26.7784	0.811035
Q7N151	ftsA	26.2782	-	26.4511	26.5515	-	26.7823	0.810998
Q7N3Z7	dadX	26.0468	26.6621	26.2114	26.6568	26.6411	26.5316	0.81052
Q7N826	plu0922	30.8497	31.0727	29.7101	31.4193	31.0134	30.1117	0.810026
Q7N2I5	plu3091	26.1798	25.5829	25.5581	26.0435	26.036	26.154	0.809869
Q7N4D0	plu2411	28.5663	29.3342	29.3276	29.1715	29.7804	29.193	0.809117
Q7N1I3	hicB1	28.2694	27.906	28.0644	28.1512	28.8484	28.1585	0.808825
Q7N595	plu2061	28.8489	27.3068	29.1814	28.491	28.6189	29.1466	0.808629
Q7MYS7	rsgA	-	-	26.1684	-	-	26.4759	0.808041
Q7N710	ndk	28.4678	29.9768	29.3851	29.8721	29.4967	29.3856	0.807634
Q7N4G7	plu2371	26.518	26.6752	-	-	26.7669	27.0471	0.806446
Q7NA94	atpD	32.144	32.7067	32.9089	32.9573	32.8177	32.9168	0.806219
Q7N7H9	trmB	-	-	24.6677	25.1253	-	24.8328	0.805907
Q7N8Q8	plu0661	30.4706	30.4582	30.4052	30.5994	30.786	30.8855	0.805349		+
Q7MZH1	folD	26.6568	26.8024	27.1643	27.2798	26.7394	27.5443	0.804769
Q7N197	gcvT	31.1104	30.1541	31.0556	31.0234	31.1652	31.0762	0.803916
Q7N1X6	era	-	-	25.4716	25.7922	-	25.7816	0.803653
Q7N5B8	plu2036	30.9734	30.1539	30.4102	30.4528	31.1912	30.8527	0.801212
Q7N5X7	plu1802	28.1766	27.6491	27.7459	28.1606	28.4716	27.908	0.799485
Q7N594	plu2062	28.7401	29.3563	29.1412	29.6404	28.9781	29.5899	0.799064
Q7N143	murF	26.4204	26.9596	26.3498	26.6453	27.1612	-	0.797395
Q7N7A1	ffh	28.0765	28.1226	27.9903	28.2284	28.5224	28.4188	0.797349		+
Q7N1E3	plu3533	25.976	24.4766	25.5007	25.6413	25.7296	25.5644	0.797003
Q7N379	rluC	25.9348	25.6554	25.8919	25.8362	26.1391	26.4918	0.796428
Q7MZJ8	plu4287	32.7738	32.3952	32.3516	32.6638	33.0363	32.807	0.79618
Q7N8L1	cysD	24.9421	-	25.1495	25.2571	-	25.497	0.794831
Q7N010	livF	27.3832	26.8303	-	27.0517	27.8897	27.3733	0.794698
Q7NA46	hslO	-	27.8643	26.7959	28.1553	27.7866	27.05	0.793383
Q7MZ77	udp	28.8278	-	28.4656	28.7594	-	29.2128	0.790356
Q7MYB3	tpiA	31.6843	30.8508	31.3813	31.6077	31.8627	31.47	0.789322
Q7N135	ilvI	29.8281	28.8516	29.9686	29.5827	29.9688	30.1216	0.789153
Q7N9T0	plu0233	-	-	25.272	25.3046	26.0206	25.5176	0.78879
Q7N8S5	plu0642	-	-	25.6037	-	-	25.9463	0.788624
Q7N796	aroF	28.6164	28.1318	29.0535	28.7696	29.0134	29.0484	0.788296
Q7N713	plu1369	29.4598	27.275	29.1422	28.7628	29.095	29.0512	0.787852
Q7N5A0	plu2056	31.1738	31.3083	30.8166	31.4792	31.6589	31.1934	0.78771
Q7N702	der	28.2403	27.6589	28.1126	28.3512	28.3271	28.3673	0.787519
Q7N4K5	plu2326	28.3195	27.8302	29.5511	28.5234	-	29.3	0.787437
Q7N7X8	dtpB	25.8462	-	-	26.1911	-	-	0.787363
Q7N5J2	fliZ	27.1868	27.0549	26.8485	27.0923	27.8364	27.1965	0.787295
Q7N2T1	cbiF	27.9437	28.6498	28.4801	28.7411	28.6107	28.7568	0.787286
Q7MYY5	rimP	26.0546	27.1032	26.7314	27.3629	27.2496	26.3135	0.786988
Q7N6G3	artI	26.0058	26.7347	25.8636	-	26.5475	-	0.786713
Q7N488	trpD	30.9761	31.1959	30.7665	31.3874	31.4587	31.1438	0.784347
Q7MYI5	tsaC	25.1269	-	-	25.4795	-	-	0.783139
Q7MZ45	plu4458	28.4828	27.1033	28.6426	28.3521	28.3851	28.5501	0.783023
Q7MYZ1	nlpI	24.1534	-	-	24.5083	-	-	0.781967
Q7N2W2	plu2962	27.0571	27.2668	27.6877	27.7221	27.7466	27.6077	0.78188
Q7N706	ispG	26.9781	27.1075	26.9696	27.5893	27.507	27.0336	0.780127
Q7N3K6	plu2709	25.3994	25.0766	25.1187	25.5927	25.5203	-	0.780111
Q7N5J8	plu1950	27.0341	27.4778	28.106	27.7624	27.6592	28.2889	0.776914
Q7N9N9	plu0278	25.8941	25.9602	26.1319	26.4648	26.396	26.2273	0.775227		+
P60004	uspA	29.2877	31.1906	28.7195	31.6766	29.6055	29.018	0.775148
Q7NA20	ISPlu4G	29.1291	30.0291	29.8236	29.8673	30.1904	30.04	0.772734
Q7N3A8	cobB	27.6262	26.0981	27.0272	27.6449	27.5057	26.7187	0.7724
Q7N092	rsmI	25.8905	25.654	25.3848	26.1126	26.0336	25.902	0.772186
Q7NA93	atpG	30.4852	30.3385	30.1264	30.3458	31.0112	30.7145	0.771758
Q7MZL3	plu4270	23.8861	-	-	24.2633	-	-	0.769968
Q7NA50	mrcA	24.7929	-	24.9864	25.0719	-	25.4639	0.769362
Q7MZZ6	zntA	26.1665	26.8579	27.1997	27.3454	26.8783	27.1385	0.768766
Q7N8Z3	plu0566	26.7982	26.9741	26.9112	27.5322	26.9538	27.3396	0.768084
Q7N386	fabG	30.5807	32.2428	31.3395	31.9719	31.6549	31.6785	0.768015
P60103	rplK	30.8244	31.6114	30.9876	31.8834	31.3188	31.3675	0.767325
Q7N3W7	pdxY	27.9337	28.6902	28.0342	28.5592	28.868	28.3824	0.766399
Q7N8I1	plu0743	24.8262	-	-	25.213	-	-	0.764861
Q7N8N7	lpxD	27.2522	27.4467	-	28.1235	-	27.3509	0.764355
Q7N571	ghrA	28.4928	29.6151	29.1107	29.7214	29.1781	29.4876	0.763403
Q7N7D1	plu1219	25.4887	-	25.8093	25.9357	26.0447	26.1353	0.763367
Q7MY25	pyrE	25.8212	26.3526	26.4176	26.7448	26.5709	26.4451	0.763225
Q7MYY2	folP	-	-	24.7812	25.3627	-	24.9808	0.762815
Q7N3N5	plu2680	27.987	27.4011	27.0559	27.9453	28.0174	27.6546	0.762546
Q7N102	abgA	26.6348	26.0075	27.5301	27.4884	26.1496	27.7221	0.760015
Q7N3Z5	fadR	27.5153	26.6157	27.4172	27.5575	-	27.6045	0.758768
Q7N489	trpG	30.7903	31.7591	31.0582	31.6141	31.7945	31.3997	0.757725
Q7N2H5	plu3102	28.9547	28.1493	28.748	28.5964	29.079	29.379	0.757428
Q7N4S2	plu2248	28.8356	29.9354	28.6863	29.783	29.2106	29.6663	0.757405
Q7N932	deoC	28.1534	28.9373	28.0241	28.9122	28.896	28.5265	0.754383
Q7N608	plu1768	-	25.6709	-	26.0797	-	-	0.753281
Q7N2K8	katE	32.7562	33.8567	33.0919	34.5363	33.0106	33.3851	0.753098
Q7MXZ5	plu4904	25.4471	25.3658	-	25.7267	25.814	25.9104	0.752331		+
Q7M7A4	plu0285	26.5372	-	26.6321	-	-	26.9956	0.752131
Q7N301	plu2922	24.5406	-	-	-	24.9518	-	0.751977
Q7N2M3	nrdB	26.8773	28.1686	28.3139	27.8969	28.3708	28.3263	0.751895
Q7N2J1	nuoF	29.4079	28.5599	29.4369	29.3556	29.6769	29.6074	0.751732
Q7MYX9	plu4537	-	-	27.7502	-	-	28.1624	0.751471
Q7N5Y8	plu1791	27.8397	27.877	27.672	28.3565	28.1681	28.105	0.750729		+
Q7MYI8	plu4689	26.0478	-	-	26.6217	-	26.306	0.749445
Q7N640	plu1730	-	27.7603	27.8498	28.2454	28.2745	28.1496	0.748406		+
Q7N137	fruR	28.3253	28.5142	28.2585	28.7638	28.9596	28.6291	0.74837		+
Q7N7W8	hpcG	28.3306	28.8401	27.4646	28.7307	29.0355	28.131	0.747105
Q7MZJ9	plu4286	32.9106	33.4209	32.6872	33.5357	33.4688	33.2784	0.746705
Q7N0I8	ribD	26.9232	26.5107	26.241	26.9778	27.1079	26.8651	0.744674
Q7MZN0	rsmC	28.6981	28.4338	28.4411	29.1955	28.9164	28.7414	0.743905
Q7MYT3	plu4589	26.5983	-	25.9959	27.0508	-	26.3981	0.743642
Q7N194	pepP	29.103	29.2863	28.744	29.2062	29.7564	29.4535	0.74351
Q7N4R4	plu2258	23.0841	-	-	-	23.513	-	0.742813
Q7N712	plu1370	25.4681	25.8746	24.944	26.1131	26.0959	25.3702	0.741826
Q7N0J0	nusB	27.7203	-	28.0637	28.3325	-	28.3141	0.741575
Q7N5K8	fliN	26.7446	27.46	-	-	27.5383	27.5313	0.740956
Q7N0J8	xseB	-	26.4403	-	-	26.8764	-	0.739104
Q7MB61	nagB	24.8813	26.5048	-	26.136	-	-	0.735603
Q7N2K0	plu3076	28.858	29.3931	29.4092	29.2773	30.1358	29.5837	0.73432
Q7N612	rlmL	27.9246	27.1717	28.5471	28.2196	28.2395	28.5275	0.733194
Q7N0E2	plsC	24.6535	-	-	25.0426	-	25.163	0.732398
Q7MZN8	ppxB	26.3779	27.316	25.7688	27.2607	27.0026	26.5477	0.732324
Q7NA86	mnmG	27.2425	27.3682	27.2903	27.971	26.8241	28.4718	0.729347
Q7N3H9	plu2737	26.1107	-	26.0401	26.698	-	26.3671	0.728401
Q7N6D3	rpsA	32.5662	32.7139	32.5586	33.0726	33.2099	32.9366	0.726906		+
Q7MZB8	lexA	27.4445	27.7238	27.3261	28.0652	28.06	27.7518	0.726558		+
Q7N2N1	plu3045	25.4818	-	26.0486	26.3658	-	26.0973	0.723793
Q7MZE3	ssb	27.8642	29.3619	27.9706	29.0474	29.1513	28.4042	0.722602
Q7N6Y8	ptsH	28.59	29.5374	28.8676	29.3403	29.6991	29.3688	0.721444
Q7N5C4	plu2030	30.0701	30.7241	30.2946	30.7066	30.9516	30.8439	0.721408
Q7MAX1	mnmE	-	-	25.2709	-	-	25.7425	0.721189
Q7N3U0	plu2623	27.3503	26.8089	26.4316	27.1764	-	27.498	0.720197
Q7M7F0	ISPlu9K	27.8811	26.6207	27.9504	27.3953	-	28.5223	0.719629
Q7N3P8	rpmI	28.5286	-	26.2926	-	-	27.8883	0.718129
Q7N964	thiE	26.249	26.2058	26.1218	26.7594	26.5539	26.6975	0.717946		+
Q7N7U7	plu1004	26.9676	26.4674	26.5062	26.9848	27.2303	27.163	0.717503
Q7N2T2	cbiG	26.3501	26.4734	26.6421	26.9677	27.1836	26.7556	0.716764		+
Q7MYQ4	plu4621	26.5673	26.5976	26.4318	26.9261	-	27.1061	0.715059		+
Q7N9H7	pmt1	-	-	24.2627	-	25.0681	24.4271	0.714547
Q7N3N3	prc	27.4605	25.6695	27.5694	27.3535	27.2724	27.5287	0.714461
Q7N4D5	plu2406	29.1565	28.6591	28.3407	29.3125	29.666	28.641	0.713143
Q7MYC8	metB	24.2854	-	24.2263	24.8676	24.6199	-	0.713072
Q7MY77	wblO	-	-	26.5162	-	-	27.0091	0.710561
Q7N394	plu2825	27.5019	28.9344	28.4752	28.448	29.1356	28.8153	0.70915
Q7MYV1	plu4567	28.699	30.6028	29.9358	30.0632	30.173	30.49	0.708983
Q7N906	nadR	24.1686	-	23.9694	24.5163	-	24.6164	0.708397		+
Q7N642	plu1728	28.5025	27.96	26.6252	28.3488	28.3714	27.8638	0.707695
Q7N2V6	plu2968	27.6021	25.5097	26.2157	27.3848	27.5097	25.9302	0.707561
Q7N5K7	fliM	27.3694	25.9097	26.8419	27.8237	26.5071	27.3135	0.703317
Q7N453	galU	-	-	26.4866	-	-	26.9982	0.701429
Q7MYU6	rlmB	-	-	25.7185	-	-	26.2319	0.700555
Q7N641	plu1729	29.7796	29.0798	28.325	29.7441	29.9682	29.0229	0.698861
Q7N790	rluD	25.0113	25.505	-	25.6968	25.8321	25.7973	0.698689
Q7NA76	rbsK	25.2878	26.2355	25.3336	26.5341	26.2589	25.6167	0.698531
Q7NAB3	plu0021	27.4596	27.9454	27.1302	28.1593	28.1263	27.8071	0.69776
Q7N6X4	plu1411	28.4558	24.7584	26.579	27.0388	-	27.1969	0.697323
Q7MZC3	plu4369	-	26.83	25.3939	26.3742	-	26.8949	0.696123
Q7N6M9	plu1517	31.0381	29.7705	29.403	31.1213	29.6976	30.9631	0.695701
Q7N937	tcaZ	26.052	24.8941	25.1181	25.8913	25.8707	-	0.69434
Q7N6U2	cydA	28.9729	27.5023	28.8057	29.0004	-	28.9069	0.694146
Q7MYF6	rplV	30.5789	30.3433	31.7322	31.2389	31.3085	31.7017	0.6918
Q7N643	plu1727	25.6777	25.1447	24.9369	25.6114	26.2495	25.5044	0.690001
Q7MYQ7	plu4618	25.9004	25.419	26.0845	26.5806	26.2899	26.1639	0.686119
Q7MYU5	rnr	27.4878	25.7283	27.6571	27.3668	27.3902	27.7622	0.683661
Q7N6C2	kdsB	26.6844	-	27.506	27.393	-	27.8973	0.683039
Q7N881	plu0860	24.1184	-	-	25.0093	24.3315	-	0.682064
Q7MYX5	rpmA	29.1836	30.006	29.4157	30.3692	29.2923	30.6091	0.680605
Q7N5M4	flgK	27.6473	25.8131	26.8971	27.7603	27.1993	27.0666	0.680077
Q7N285	vacJ	25.9527	-	26.1892	26.9827	-	26.2779	0.678613
Q7MYY3	glmM	26.3666	26.3137	27.6511	27.6539	26.6978	27.6746	0.675968
Q7N9G3	plu0373	30.1858	32.0789	30.8859	31.9353	31.5364	31.3882	0.67372
Q7N182	plu3613	25.7638	25.5437	25.9745	26.3693	-	26.2978	0.672266		+
Q7N2H3	plu3104	26.5131	27.1126	26.548	27.3846	27.2887	27.2226	0.67173		+
Q7N9G7	plu0369	-	-	23.8828	-	-	24.4625	0.669117
Q7N127	leuC	26.1526	24.2528	25.818	25.1692	26.4977	26.2961	0.669053
Q7N4U5	plu2220	27.2113	28.0438	27.5455	28.5983	27.836	28.1076	0.66876
Q7MYM9	hemY	28.4313	27.6149	28.5139	28.6223	28.976	28.7118	0.667421
Q7N4S9	plu2238	26.0968	25.9632	26.4892	26.4149	-	27.1278	0.665126
Q7MYW5	ppa	30.4611	32.6409	30.5628	32.597	30.7394	32.1017	0.663833
Q7N827	plu0921	26.8443	-	-	27.1763	27.6133	27.5277	0.662162
Q7N9H1	plu0365	26.158	-	26.573	26.71	-	27.2195	0.660106
Q7NA91	atpH	28.7594	-	29.4984	29.9201	29.5863	29.6916	0.658047
Q7MYE8	tuf2	30.1331	30.8222	31.3859	30.6279	31.9024	31.6367	0.655828
Q7N293	hutC	24.8355	-	25.0864	25.5726	-	-	0.65443
Q7N8J0	plu0732	-	27.4313	-	-	28.0458	-	0.653161
Q7NA58	dam	-	-	23.6718	-	-	24.295	0.649243
Q7N490	trpE	32.3392	32.7962	32.1049	33.3976	32.565	33.2339	0.636347
Q7MZ03	plu4508	26.1431	23.1219	26.3992	25.9477	25.5966	26.1481	0.625865
Q7MZF5	plu4334	30.912	28.9382	29.6084	30.3205	29.7488	31.4221	0.625203
Q7N6N6	plu1510	25.0759	-	25.8101	25.9136	-	26.3428	0.621915
Q7N5C2	plu2032	31.3469	31.4415	31.7728	32.1892	32.2819	32.1556	0.620506		+
Q7N8C5	plu0803	25.7372	26.25	25.2252	26.6356	26.5958	26.0576	0.618912
Q7N3B8	plu2800	27.4665	27.8486	27.3551	28.4214	28.3324	27.9934	0.618862		+
Q7N129	leuA	26.177	24.4488	26.4276	26.7637	26.6761	25.7135	0.615601
Q7N9G5	plu0371	29.367	28.6139	27.7597	29.5654	29.0274	29.2514	0.61506
Q7N369	plu2850	28.386	28.3254	26.2205	28.3179	28.61	28.109	0.614867
Q7N5T6	cheA	26.8386	-	26.7866	27.9854	-	27.0562	0.61206
P0A7U0	rpsR	30.4998	-	28.692	30.4834	30.342	30.1481	0.603507
Q7MB62	nagA	24.4917	-	-	24.5739	-	25.8755	0.601647
Q7MYC9	metL	26.259	25.1326	26.228	26.7734	-	26.4656	0.596127
Q7N577	luxC	27.0355	26.149	26.1135	27.5342	27.2927	26.7268	0.593822
Q7N2K9	plu3067	25.9334	26.7801	-	27.1614	-	27.0644	0.592058
Q7N212	plu3295	25.6292	-	25.7995	27.0207	26.6652	25.7362	0.590625
Q7MYW8	argR	28.389	28.7334	28.7608	29.2706	-	29.506	0.590251		+
Q7N0S9	atoA	25.4364	-	25.1999	-	-	26.0841	0.588066
Q7MYX4	rplU	31.0707	-	30.1945	31.7281	-	31.0729	0.587266
Q7N797	plu1261	28.7914	31.2859	30.6026	31.1881	31.0349	30.7757	0.58522
Q7MY64	wblY	24.6924	-	-	25.4804	-	-	0.579142
Q7N2J3	nuoH	-	-	26.0615	26.6313	-	27.0681	0.579064
Q7N791	bamD	27.4936	28.0267	26.6172	28.2187	28.4536	27.8466	0.576831
Q7N296	hutH	28.2309	29.7609	27.4279	29.9575	29.0453	28.8088	0.575408
Q7N4Z2	pntB	29.0855	28.0446	28.2041	29.1291	29.4504	29.2183	0.565967
Q7N0M0	queC	27.4324	30.2283	28.6327	29.7702	29.4028	29.5848	0.56586
Q7MYE3	btuB	24.9154	-	25.322	-	-	25.9441	0.564326
Q7N6F9	macB	-	22.8839	-	23.721	-	-	0.559787
P68702	atpE	29.3668	-	30.3151	30.9499	-	30.4545	0.550454
Q7N874	plu0867	25.6999	-	25.481	26.4537	-	-	0.549722
Q7N5J5	fliD	28.1156	26.2425	26.5559	28.4543	28.1481	26.9039	0.549386
Q7MZK1	plu4284	-	-	27.6362	-	-	28.5072	0.546787
Q7N3A6	lolD	23.7487	24.4503	23.9969	25.1721	-	24.7037	0.546161
Q7N2K5	menB	27.5702	26.1414	27.7914	28.1444	28.0762	27.9094	0.544989
Q7MYF3	rplW	30.4629	31.0172	29.1095	31.2551	31.2665	30.7211	0.54173
Q7N3M7	plu2688	-	-	27.1801	-	-	28.0759	0.53743
Q7N5K1	fliG	25.1333	-	25.2355	26.7003	-	25.5103	0.528198
Q7N0M8	plu3854	31.0455	30.8496	30.5407	33.5791	31.0316	30.6507	0.520558
Q7MZ50	plu4451	25.0483	-	24.8749	24.8818	-	26.9398	0.517923
Q7MZH3	plu4314	25.7418	-	-	26.5779	26.8365	-	0.512128
Q7N122	speB	25.959	26.7577	26.0704	27.5389	26.9577	-	0.5049
Q7N653	plu1716	-	-	23.5792	-	-	24.6653	0.471043
Q7N5Z2	acyP	23.3748	-	-	24.4811	-	-	0.464471
Q7N376	plu2843	26.9559	-	-	27.5433	-	28.5884	0.463328
Q7N352	rplY	27.3874	30.4762	30.4294	30.5733	30.4228	30.7562	0.449655
Q7N2W0	plu2964	-	-	25.0997	26.351	-	-	0.420052
Q7N5T5	cheW	-	-	26.1175	27.9002	-	-	0.290633
Q7MAX5	ppc	29.6408	-	34.4149	34.6102	33.7548	34.1801	0.22471
P65114	infA	-	-	-	27.8319	-	-	-
Q7MAX8	miaA	-	-	-	27.4037	26.2337	26.8969	-
Q7MB22	mnmA	-	-	-	-	-	25.3814	-
Q7MBG9	sthA	-	-	-	26.8741	26.2194	26.6338	-
Q7MY36	mutM	24.5252	-	-	-	-	-	-
Q7MYG9	rpmD	-	-	-	29.9351	29.9673	-	-
Q7MYM6	wecG	-	-	28.9371	-	-	-	-
Q7MZ76	pcp2	-	-	-	-	-	23.8643	-
Q7MZ97	metA	-	-	-	-	-	24.6864	-
Q7MZB5	ubiC	27.4607	-	-	-	-	-	-
Q7MZY2	frdC	26.0215	-	-	-	-	-	-
Q7N015	fis	-	-	-	-	-	24.2544	-
Q7N035	plu4068	-	-	-	-	-	23.87	-
Q7N089	diaA	-	-	-	24.001	-	-	-
Q7N144	mraY	-	-	-	-	-	25.5795	-
Q7N145	murD	-	-	-	24.9116	-	-	-
Q7N148	murC	-	-	-	-	-	24.4714	-
Q7N158	coaE	-	24.6511	24.9783	-	-	-	-
Q7N179	plu3616	-	-	24.7834	-	-	-	-
Q7N1C1	plu3555	21.9432	-	-	-	-	-	-
Q7N1U1	smpB	27.5455	-	-	-	-	-	-
Q7N222	trmJ	-	-	-	-	-	26.2429	-
Q7N2E0	lsrR	-	-	-	-	-	23.4533	-
Q7N2G8	astA	27.2037	-	25.7282	-	-	-	-
Q7N2H1	astE	-	-	-	-	26.5181	-	-
Q7N2I7	nuoA	-	-	-	25.2311	-	-	-
Q7N2J6	nuoK	-	-	-	-	-	26.1643	-
Q7N2J9	nuoN	-	-	-	-	-	25.9111	-
Q7N2K3	menD	25.5375	-	-	-	-	-	-
Q7N3M2	plu2693	-	-	-	-	-	24.8191	-
Q7N3N4	htpX	-	-	-	25.626	25.0495	-	-
Q7N3U5	sufS	-	-	-	24.2113	-	-	-
Q7N3U8	lpp	-	-	-	-	-	32.0806	-
Q7N3V2	mdtK	22.7311	-	-	-	-	-	-
Q7N3Y7	ttcA	24.9931	25.5726	-	-	-	-	-
Q7N451	plu2503	-	-	-	-	-	23.2246	-
Q7N475	plu2479	26.3901	-	25.9456	-	-	-	-
Q7N545	znuC	-	-	-	24.696	-	24.5842	-
Q7N589	ispE	-	-	-	-	24.0043	-	-
Q7N5M6	flgI	-	-	-	-	-	25.1037	-
Q7N5M7	flgH	-	-	-	24.1683	-	-	-
Q7N5T1	cheB	26.0421	-	-	-	-	-	-
Q7N5W0	pyrC	-	-	-	-	26.4994	25.9772	-
Q7N6E9	lolA	-	-	26.6376	-	-	-	-
Q7N6I1	hisCD	26.5886	-	-	-	-	-	-
Q7N6K1	plu1549	-	-	-	-	-	22.9414	-
Q7N6R3	modC	-	-	-	24.4909	-	-	-
Q7N6Z9	hemF	-	-	25.6671	-	-	-	-
Q7N750	lnt	-	-	22.2302	-	-	-	-
Q7N7B4	gpt	-	-	-	27.6108	-	-	-
Q7N7G6	plu1183	25.9753	-	-	-	-	-	-
Q7N8L2	cysG	-	-	-	-	-	21.9996	-
Q7N8P2	uppS	-	-	-	25.5704	-	-	-
Q7N8P3	dxr	-	-	-	-	24.3239	25.0653	-
Q7N8Q9	xni	-	-	-	24.7291	-	-	-
Q7N8Z5	thrB	-	-	25.5117	-	-	-	-
Q7N902	trpR	-	-	-	-	24.1966	-	-
Q7N961	nudC	24.9418	-	-	-	-	-	-
Q7N976	malT	-	-	-	-	-	23.5842	-
Q7N986	malK	-	-	-	-	21.9892	-	-
Q7N9U4	pstB	-	-	-	-	30.0997	-	-
Q7N9W4	glpG	-	-	22.6911	-	-	-	-
Q7NA24	rsmJ	-	-	-	-	23.3576	-	-
Q7NA33	cynS	-	-	-	25.6959	-	25.8634	-
F5HB60	bvgR	-	-	-	23.9824	-	-	-
Q7MZD0	ISPlu3E	26.1857	-	-	-	-	-	-
Q7M7A1	plu3706	-	-	24.3404	-	-	-	-
Q7M7G9	plu3581	24.3173	-	-	-	-	-	-
Q7MAZ0	dgkA	-	-	-	-	-	25.2089	-
Q7MAZ5	plu4160	24.2853	-	-	-	-	-	-
Q7MB00	plu3930	-	-	-	-	-	23.8526	-
Q7MB06	plu3561	-	-	-	-	-	21.7914	-
Q7MB21	plu2851	-	-	-	-	23.3945	-	-
Q7MB71	plu0934	-	23.0354	-	-	-	-	-
Q7MB72	dgt	-	-	24.8651	-	-	-	-
Q7MB74	plu0824	-	-	25.3246	-	-	-	-
Q7MB86	prtC	-	-	-	-	25.4041	-	-
Q7MXZ7	plu4902	23.3828	-	-	-	-	-	-
Q7MY06	plu4892	-	-	-	-	24.7205	-	-
Q7MY09	fdoI	-	-	-	-	22.6756	-	-
Q7MY16	plu4880	-	-	23.865	-	-	-	-
Q7MY27	dfp	-	-	25.8241	-	-	-	-
Q7MY40	rfaQ	-	-	-	-	-	21.8864	-
Q7MY41	rfaG	25.5614	-	-	-	-	-	-
Q7MY44	rfaC	-	-	-	-	-	24.4547	-
Q7MY51	plu4841	-	-	24.9961	-	-	-	-
Q7MY69	wblT	24.9023	-	-	-	-	-	-
Q7MY74	wzxB	-	-	-	-	-	22.8017	-
Q7MY76	wblP	-	-	-	24.7638	-	-	-
Q7MY79	wblM	-	-	-	-	-	23.8537	-
Q7MY80	wblF	-	-	-	-	-	20.8646	-
Q7MY90	wblC	-	-	-	-	-	25.7202	-
Q7MY93	cpxA	-	-	23.5366	-	-	-	-
Q7MY95	cpxP	-	-	-	-	-	26.1489	-
Q7MYA7	plu4779	-	-	-	-	-	25.1018	-
Q7MYB2	sbp	-	-	24.5571	-	-	-	-
Q7MYB7	glpF	-	-	-	21.1614	-	-	-
Q7MYC0	menA	-	-	-	-	-	23.0227	-
Q7MYH7	zntR	23.9909	-	-	-	-	-	-
Q7MYK2	plu4675	-	-	-	-	24.9399	-	-
Q7MYK8	ilvY	-	-	-	-	-	24.0925	-
Q7MYL0	rep	-	-	-	23.7439	-	-	-
Q7MYL7	wecB	25.6774	-	-	-	-	-	-
Q7MYQ5	recQ	-	-	-	21.9025	-	-	-
Q7MYS3	plu4600	-	-	-	24.8709	-	24.8228	-
Q7MYS5	plu4598	-	-	-	24.0845	-	-	-
Q7MYT8	amiB	-	-	-	24.9195	-	-	-
Q7MYW3	plu4553	-	-	23.4127	-	-	-	-
Q7MYX2	plu4544	-	-	-	-	-	24.7165	-
Q7MZ26	holC	24.0533	-	-	-	-	-	-
Q7MZ28	plu4480	25.947	-	-	-	-	-	-
Q7MZ29	plu4479	-	-	-	-	-	24.0246	-
Q7MZ41	plu4466	-	21.5399	-	-	-	-	-
Q7MZ75	plu4419	26.0552	-	-	-	-	-	-
Q7MZA9	dltA	-	-	-	-	-	24.4542	-
Q7MZD4	alr	-	-	22.9188	-	-	-	-
Q7MZF6	plu4333	23.6425	-	-	-	-	-	-
Q7MZG3	plu4326	-	-	-	-	-	24.3953	-
Q7MZG5	plu4324	24.3111	-	-	-	-	-	-
Q7MZG7	hsdR	-	-	-	-	-	25.6978	-
Q7MZG9	hsdS	-	-	-	25.4862	-	-	-
Q7MZH2	plu4316	-	-	-	-	-	25.0861	-
Q7MZI0	rtcB	-	-	-	-	-	25.2483	-
Q7MZI6	plu4300	-	-	24.821	-	-	-	-
Q7MZI7	plu4299	-	-	-	-	-	23.097	-
Q7MZI8	plu4298	-	-	-	-	-	21.2556	-
Q7MZK4	plu4281	-	-	-	24.6243	-	-	-
Q7MZP0	plu4241	25.3768	-	26.0415	-	-	-	-
Q7MZP7	plu4231	-	-	-	25.5764	26.3301	25.8151	-
Q7MZT8	plu4186	-	-	-	-	-	24.8109	-
Q7MZW3	plu4149	-	-	-	-	-	23.9677	-
Q7MZX1	plu4140	-	-	-	-	24.7215	24.4372	-
Q7MZZ9	plu4105	-	23.4944	-	-	-	-	-
Q7N005	plu4099	-	-	-	-	-	22.4006	-
Q7N033	mreC	-	-	-	23.9384	-	-	-
Q7N040	plu4063	-	23.1968	-	-	-	-	-
Q7N056	rpoN	-	-	24.5189	-	-	-	-
Q7N059	lptC	-	-	-	-	25.5754	-	-
Q7N060	plu4037	-	-	25.7627	-	-	-	-
Q7N067	plu4029	-	-	26.9033	-	-	-	-
Q7N096	plu3997	23.459	-	23.4153	-	-	-	-
Q7N098	plu3995	-	-	-	-	-	24.6289	-
Q7N0B2	plu3981	-	-	-	-	24.7613	-	-
Q7N0D2	plu3959	25.7351	-	-	-	-	-	-
Q7N0E6	plu3944	-	-	-	-	22.3779	-	-
Q7N0F2	plu3938	25.6679	-	-	-	-	-	-
Q7N0I4	yajC	-	-	30.2366	-	-	-	-
Q7N0M2	plu3860	-	-	-	23.536	-	-	-
Q7N0M9	hha	-	-	-	26.8232	-	-	-
Q7N0Q7	copA	-	-	25.3244	-	-	-	-
Q7N0Q9	plu3822	-	-	-	25.6468	-	26.606	-
Q7N0R5	ybbP	-	-	-	-	24.9813	-	-
Q7N0S1	purK	-	-	24.7671	-	-	-	-
Q7N0V3	plu3776	22.6564	-	-	-	-	-	-
Q7N0Z2	plu3737	-	-	-	23.9541	-	-	-
Q7N104	abgT	-	-	26.1181	-	-	-	-
Q7N131	fadD	26.4856	-	-	-	-	-	-
Q7N146	ftsW	-	-	-	-	-	21.5073	-
Q7N150	ftsQ	-	-	-	23.3412	-	-	-
Q7N171	pdhR	-	-	-	-	-	22.9127	-
Q7N195	ubiH	26.8405	-	26.2909	-	-	-	-
Q7N1A0	plu3594	-	-	-	-	23.5038	-	-
Q7N1A6	plu3576	-	-	-	21.9689	-	-	-
Q7N1D0	ISPlu15A	27.5066	-	-	-	-	-	-
Q7N1D5	prpC	-	-	-	-	-	24.5599	-
Q7N1D9	plu3537	-	-	-	-	25.0192	-	-
Q7N1E5	plu3531	22.5261	-	-	-	-	-	-
Q7N1F5	plu3521	-	-	-	-	-	25.2967	-
Q7N1G1	plu3515	-	-	-	-	22.9558	-	-
Q7N1G6	plu3509	-	-	-	25.2623	-	-	-
Q7N1G9	plu3506	22.6498	-	-	-	-	-	-
Q7N1H3	plu3502	-	-	-	23.3529	-	-	-
Q7N1J6	plu3477	-	-	-	22.6023	-	-	-
Q7N1L3	plu3458	-	-	21.7364	-	-	-	-
Q7N1L5	plu3456	-	-	23.5229	-	-	-	-
Q7N1L8	plu3453	-	-	-	-	-	25.143	-
Q7N1P1	plu3430	-	-	-	-	-	23.2153	-
Q7N1Q3	plu3418	-	-	-	-	-	24.9957	-
Q7N1T2	plu3387	-	-	-	-	-	23.9441	-
Q7N1U0	plu3379	26.0121	25.8767	-	-	-	-	-
Q7N1V1	plu3368	-	-	23.2706	-	-	-	-
Q7N1Y3	plu3331	-	-	-	22.6545	-	-	-
Q7N1Y4	plu3330	-	24.5974	-	-	-	-	-
Q7N1Z0	plu3324	-	-	-	-	-	27.1653	-
Q7N1Z6	plu3315	-	-	-	24.8246	-	-	-
Q7N203	plu3307	-	-	24.805	-	-	-	-
Q7N207	plu3302	-	-	-	-	-	25.6927	-
Q7N208	plu3301	-	-	25.6882	-	-	-	-
Q7N218	treR	-	-	-	21.9043	-	-	-
Q7N232	plu3275	-	-	-	-	-	25.4511	-
Q7N249	plu3248	26.3394	-	-	-	-	-	-
Q7N277	plu3214	24.1971	-	-	-	-	-	-
Q7N284	plu3204	-	-	27.7679	-	-	-	-
Q7N289	sixA	-	-	-	23.5777	24.2725	-	-
Q7N2A8	plu3180	-	-	-	26.0643	26.2852	26.2164	-
Q7N2D1	plu3154	-	22.6305	-	-	-	-	-
Q7N2E7	plu3134	-	-	24.2886	-	-	-	-
Q7N2H4	plu3103	26.0992	-	-	-	-	-	-
Q7N2H9	plu3097	-	-	23.1502	-	-	-	-
Q7N2J5	nuoJ	-	-	-	24.4842	-	-	-
Q7N2K2	menF	23.6255	-	-	-	-	-	-
Q7N2L0	plu3066	-	-	-	-	-	26.468	-
Q7N2L9	vapC	-	-	-	-	-	24.13	-
Q7N2Q2	plu3024	-	-	-	-	24.8675	-	-
Q7N2Q8	plu3018	-	-	-	25.3686	-	24.2232	-
Q7N2T9	cobS	-	-	22.4465	-	-	-	-
Q7N2Z9	plu2924	27.1378	-	-	-	-	-	-
Q7N300	plu2923	-	-	-	-	-	23.2098	-
Q7N306	plu2917	-	-	-	22.871	-	-	-
Q7N332	plu2891	-	-	-	-	25.5246	-	-
Q7N337	plu2885	-	-	-	-	-	25.4626	-
Q7N362	plu2859	-	23.6642	-	-	-	-	-
Q7N363	fruK	-	-	-	23.7168	-	-	-
Q7N377	plu2842	-	-	-	-	26.2329	-	-
Q7N393	plu2826	25.2119	-	25.8208	-	-	-	-
Q7N3A3	plu2816	24.4816	-	-	-	-	-	-
Q7N3B1	phoQ	-	-	-	-	-	21.0107	-
Q7N3D9	baeR	-	-	-	-	-	22.7508	-
Q7N3F0	plu2767	-	-	-	25.1901	-	-	-
Q7N3F5	speG	-	-	-	22.326	-	-	-
Q7N3G3	celA	-	-	-	28.2914	-	-	-
Q7N3G8	perM	-	-	-	-	24.8318	-	-
Q7N3H4	plu2742	-	-	-	-	-	23.5587	-
Q7N3P3	yfeA	-	25.9314	-	-	-	-	-
Q7N3R4	plu2651	23.6135	-	-	-	-	-	-
Q7N3R5	plu2650	-	-	24.8169	-	-	-	-
Q7N3S3	plu2640	-	27.9014	-	-	-	-	-
Q7N3S5	plu2638	-	-	-	-	-	23.3938	-
Q7N3T1	hmuR	-	-	-	27.0255	-	25.7231	-
Q7N3T6	plu2627	-	-	-	-	22.0591	-	-
Q7N3U3	sufC	-	-	-	-	-	25.7133	-
Q7N3V3	ribE	-	-	-	25.9111	-	25.3334	-
Q7N401	plu2556	-	-	-	22.2298	-	-	-
Q7N402	pncA	-	-	-	24.2864	-	-	-
Q7N414	plu2543	-	-	-	25.1538	-	-	-
Q7N441	plu2513	-	-	-	-	21.3934	-	-
Q7N445	plu2509	-	-	-	-	-	23.816	-
Q7N447	plu2507	-	-	25.1861	-	-	-	-
Q7N467	clsA	-	-	-	22.3619	-	-	-
Q7N499	plu2453	-	-	21.6261	-	-	-	-
Q7N4A1	btuR	-	-	-	-	-	26.1694	-
Q7N4A2	plu2450	-	-	-	26.495	-	-	-
Q7N4C0	lapB	-	-	-	23.5853	-	-	-
Q7N4C2	plu2426	-	-	-	-	-	24.3715	-
Q7N4C7	plu2421	-	-	-	23.9515	-	-	-
Q7N4F9	rnfC	-	-	25.606	-	-	-	-
Q7N4G5	plu2373	-	-	-	25.5327	24.5786	-	-
Q7N4G8	plu2369	-	-	25.5173	-	-	-	-
Q7N4H2	plu2365	-	-	-	-	25.0598	25.4643	-
Q7N4K3	plu2328	-	-	-	-	-	23.1432	-
Q7N4L0	plu2321	-	-	-	-	-	23.6988	-
Q7N4L2	plu2319	-	-	-	-	-	22.0834	-
Q7N4L9	plu2308	-	-	-	-	-	25.2747	-
Q7N4M0	plu2306	-	-	-	-	-	24.3501	-
Q7N4M3	plu2302	-	-	-	-	22.8031	-	-
Q7N4P4	ccdA	-	-	-	25.1819	25.5257	25.157	-
Q7N4P5	plu2277	-	-	-	-	-	24.7902	-
Q7N4Q2	plu2270	-	-	-	-	24.3019	-	-
Q7N4Q3	plu2269	24.7218	-	-	-	-	-	-
Q7N4Q5	plu2267	-	-	-	-	-	24.9148	-
Q7N4Q7	plu2265	-	-	-	-	-	23.4423	-
Q7N4R0	plu2262	-	-	-	-	24.9815	-	-
Q7N4R6	plu2256	-	-	24.7551	-	-	-	-
Q7N4T4	plu2233	24.9441	-	-	-	-	-	-
Q7N4V2	plu2213	-	-	-	25.7227	-	-	-
Q7N4X0	plu2194	-	-	-	22.2094	-	-	-
Q7N4Z5	acpP	-	-	-	-	-	28.42	-
Q7N505	plu2155	-	24.1167	-	-	-	-	-
Q7N506	plu2154	-	-	23.3523	-	-	-	-
Q7N513	plu2147	-	-	-	24.3988	-	24.1396	-
Q7N540	plu2120	25.9004	-	-	-	-	-	-
Q7N552	plu2106	-	-	-	-	24.1589	-	-
Q7N569	plu2088	25.5536	-	-	-	-	-	-
Q7N5A6	plu2050	-	-	-	25.324	-	24.9094	-
Q7N5B5	plu2040	23.9996	-	-	-	-	-	-
Q7N5D0	plu2024	25.7383	-	-	-	-	-	-
Q7N5E5	plu2007	-	-	26.202	-	-	-	-
Q7N5E8	plu2004	-	-	-	-	-	23.3429	-
Q7N5F3	plu1999	-	-	-	24.3893	-	-	-
Q7N5H0	sgcA	-	-	-	24.4095	-	-	-
Q7N5H2	plu1977	25.3224	-	-	-	-	-	-
Q7N5H5	plu1974	-	-	25.5071	-	-	-	-
Q7N5I3	plu1966	23.5798	-	-	-	-	-	-
Q7N5K2	fliH	25.2149	-	-	-	-	-	-
Q7N5L0	fliP	-	-	-	-	26.8234	-	-
Q7N5M9	flgF	-	-	-	22.3073	-	-	-
Q7N5P1	plu1907	-	-	-	-	25.0823	-	-
Q7N5P3	plu1903	-	-	-	24.089	-	-	-
Q7N5P7	plu1899	26.5454	27.0342	-	-	-	-	-
Q7N5P8	plu1897	25.6115	-	-	-	-	-	-
Q7N5T0	cheY	26.134	-	-	-	-	-	-
Q7N5T8	motA	26.0347	-	25.2015	-	-	-	-
Q7N5U6	plu1836	-	-	-	-	-	24.5592	-
Q7N5W7	plu1812	-	-	-	21.9312	-	-	-
Q7N5X9	plu1800	-	-	-	-	-	25.9485	-
Q7N657	plu1711	-	-	-	-	22.7914	-	-
Q7N661	plu1706	-	-	-	24.2041	25.1715	-	-
Q7N6B6	plu1640	26.973	-	-	-	-	-	-
Q7N6D7	plu1618	-	25.1927	-	-	-	-	-
Q7N6G7	plu1583	-	-	-	20.5318	-	-	-
Q7N6J1	plu1559	-	-	-	-	-	23.6443	-
Q7N6L8	plu1531	-	-	-	-	-	24.4406	-
Q7N6M8	plu1518	-	-	-	26.5408	-	26.1975	-
Q7N6N0	plu1516	24.4464	-	24.9748	-	-	-	-
Q7N6N9	ybhR	-	-	24.4172	-	-	-	-
Q7N6P1	plu1504	24.2596	-	-	-	-	-	-
Q7N6P3	moaE	-	-	-	23.1455	-	-	-
Q7N6S2	pnuC	23.8871	-	-	-	-	-	-
Q7N6S4	plu1467	-	-	-	24.0132	-	-	-
Q7N6T1	plu1460	-	-	-	25.3452	-	-	-
Q7N6T3	plu1458	-	-	-	-	23.9759	-	-
Q7N6T7	tolA	24.7487	-	-	-	-	-	-
Q7N6U5	plu1444	-	-	-	-	-	23.2541	-
Q7N6U6	plu1443	-	23.2252	-	-	-	-	-
Q7N6U8	plu1440	-	-	-	-	-	25.3904	-
Q7N6W0	sdhD	-	-	-	27.7537	-	-	-
Q7N6X1	plu1414	-	-	-	-	-	22.4869	-
Q7N6X2	plu1413	-	-	-	-	-	23.3729	-
Q7N6Z7	plu1385	-	-	-	-	23.6681	-	-
Q7N701	plu1381	-	-	-	-	26.2722	-	-
Q7N726	plu1344	-	-	-	23.8017	-	-	-
Q7N737	plu1326	23.4303	-	-	-	-	-	-
Q7N754	gltL	-	-	-	-	-	26.5104	-
Q7N759	rsfS	26.6033	-	-	-	-	-	-
Q7N7A7	plu1248	-	-	-	25.231	-	-	-
Q7N7D8	plu1212	-	-	-	-	-	24.2164	-
Q7N7D9	plu1211	-	-	-	-	24.3065	23.7816	-
Q7N7F3	nqrB	-	-	25.5421	-	-	-	-
Q7N7I0	mutY	24.6817	-	-	-	-	-	-
Q7N7L2	plu1120	-	-	-	-	-	23.4758	-
Q7N7L6	plu1106	-	-	-	30.8203	-	-	-
Q7N7L8	plu1104	-	-	-	-	26.6179	-	-
Q7N7M5	plu1092	-	-	-	24.1612	-	-	-
Q7N7N9	plu1075	-	-	-	-	-	25.0318	-
Q7N7P6	plu1065	-	-	-	23.7599	-	-	-
Q7N7V9	ngrA	-	-	-	23.2144	-	-	-
Q7N814	plu0935	-	-	-	-	-	25.632	-
Q7N830	plu0918	-	-	-	25.7225	-	-	-
Q7N832	plu0916	-	-	-	-	-	23.0902	-
Q7N848	plu0899	-	-	-	-	23.9507	23.1073	-
Q7N851	plu0896	-	-	-	25.1537	24.3689	-	-
Q7N852	plu0895	-	-	-	-	23.5626	-	-
Q7N8A1	agaS	-	-	24.3329	-	-	-	-
Q7N8A4	ampC	-	24.4456	-	-	-	-	-
Q7N8E0	plu0787	-	-	-	-	-	22.3236	-
Q7N8I0	plu0744	21.7986	-	-	-	-	-	-
Q7N8I7	plu0735	25.6631	-	-	-	-	-	-
Q7N8I8	plu0734	-	-	-	-	-	24.7802	-
Q7N8L7	plu0702	-	-	-	25.2703	-	24.1678	-
Q7N8L8	queE	24.4456	-	-	-	-	-	-
Q7N8L9	plu0700	-	-	25.6651	-	-	-	-
Q7N8M5	rcsF	-	-	-	26.4774	-	26.1296	-
Q7N8N2	dnaE	-	-	24.5133	-	-	-	-
Q7N8Q5	plu0664	-	-	-	-	-	23.2355	-
Q7N8R0	prtD	21.9852	-	-	-	-	-	-
Q7N8R9	plu0649	-	-	-	-	24.3259	-	-
Q7N8S6	plu0641	-	-	-	27.5702	-	27.4933	-
Q7N8S8	plu0639	-	-	-	25.1598	-	-	-
Q7N8U3	plu0624	-	-	26.379	-	-	-	-
Q7N8W6	plu0599	-	-	23.6904	-	-	-	-
Q7N8W7	plu0598	-	-	-	23.9373	-	-	-
Q7N8X0	fkpB	-	-	-	23.2922	-	-	-
Q7N933	plu0519	-	-	-	27.2041	-	-	-
Q7N939	plu0512	-	-	-	-	-	23.4619	-
Q7N953	gntR	-	-	24.3972	-	-	-	-
Q7N962	plu0487	-	-	-	-	-	24.6724	-
Q7N968	plu0480	-	23.0289	-	-	-	-	-
Q7N982	plu0461	-	-	-	-	22.8457	-	-
Q7N992	plu0451	-	-	-	-	25.8424	-	-
Q7N9A0	plu0443	-	-	25.1787	-	-	-	-
Q7N9A1	plu0442	-	-	-	-	-	23.5534	-
Q7N9B0	secE	-	-	-	26.022	-	-	-
Q7N9E4	plu0396	-	-	26.1796	-	-	-	-
Q7N9E6	pabA	-	-	-	-	24.5222	-	-
Q7N9E8	ppiA	-	-	-	-	25.1252	-	-
Q7N9F8	mobB	-	-	-	-	22.1629	-	-
Q7N9F9	plu0377	-	-	-	25.0491	25.6151	25.239	-
Q7N9H0	plu0366	-	-	-	-	-	22.8498	-
Q7N9H5	plu0361	-	-	-	24.6556	-	-	-
Q7N9J4	plu0337	23.0186	-	-	-	-	-	-
Q7N9I1	plu0352	24.9735	-	-	-	-	-	-
Q7N9J1	plu0340	-	-	-	-	-	22.9766	-
Q7N9K7	phlB	-	-	-	-	-	22.2849	-
Q7N9L7	plu0305	-	-	-	-	-	22.5209	-
Q7N9L9	dppD	24.869	-	25.8919	-	-	-	-
Q7N9M8	tag	-	-	-	-	-	23.9186	-
Q7N9M9	avtA	-	-	-	-	24.3352	23.9453	-
Q7N9N2	plu0288	-	-	-	-	-	23.536	-
Q7N9Q5	recG	-	-	-	-	-	23.9121	-
Q7N9Q6	plu0258	-	-	-	-	-	25.4234	-
Q7N9R0	relB	-	-	-	-	-	25.0359	-
Q7N9S4	plu0239	28.0788	-	-	-	-	-	-
Q7N9S7	glnL	-	-	-	22.2843	-	-	-
Q7N9X2	plu0179	-	-	24.0076	-	-	-	-
Q7N9X6	uxuB	-	-	-	25.1367	25.2404	25.4371	-
Q7N9Y6	plu0165	-	22.6641	-	-	-	-	-
Q7N9Y9	plu0162	-	-	-	-	20.1707	-	-
Q7N9Z2	plu0159	-	-	-	-	21.76	-	-
Q7NA02	plu0146	-	-	-	-	-	23.649	-
Q7NA31	plu0114	-	26.6672	-	-	-	-	-
Q7NA38	plu0107	-	-	-	-	-	25.1156	-
Q7NA39	plu0106	26.5351	-	-	-	-	-	-
Q7NA69	plu0076	-	24.3129	-	-	-	-	-
Q7NA75	rbsR	-	-	-	23.3408	-	-	-
Q7NA78	rbsC	-	-	-	-	-	23.3853	-
Q7NA84	asnC	-	-	-	-	-	23.6892	-
Q7NAA8	plu0026	-	-	-	-	22.7469	-	-
Q7NAA9	plu0025	-	-	-	-	25.7615	-	-
Q7NAC0	plu0014	-	-	-	-	-	25.6509	-
