# Supplementary material for: Genome mining unearths a hybrid nonribosomal peptide synthetase-like-pteridine synthase biosynthetic gene cluster
Source: eLife. 2017 Mar 15;6:e25229. doi: 10.7554/eLife.25229 (PMC5384830; doi:10.7554/eLife.25229)
Supplement: Figure 8—source data 4. — Intensities from label-free quantification calculated using MaxQuant, averaged for biological triplicate samples, then log2 transformed. Proteins presented exhibited ≥2 fold increased average intensity in ΔhexAΔlocus compared with ΔhexA. Two-tailed t-test performed using a cutoff of FDR = 0.01 and 2-fold intensity difference, or p<0.05 (+ indicates statistical significance). DOI: http://dx.doi.org/10.7554/eLife.25229.032 [file elife-25229-fig8-data4.xlsx]

## Sheet: Sheet1
Uniprot ID	Gene ID	ΔHexA (log2intensity)	ΔHexAΔ (log2intensity)	Fold change (raw intensity)	Significance (FDR=0.01 S0=2)	Significance (P<0.05)
Q7N607	rmf	27.4856	24.7615	6.60753	+	+
Q7MB87	plu0643	28.1208	25.7117	5.31132	+	+
Q7MY49	plu4844	32.3729	30.0599	4.96919	+	+
Q7N195	ubiH	27.1897	24.93	4.78865
Q7N651	plu1718	28.2071	25.9488	4.78447	+	+
Q7N5Q8	plu1886	32.0254	29.8716	4.44977
Q7N653	plu1716	25.4698	23.4012	4.19491
Q7N647	plu1723	28.3974	26.3527	4.1261	+	+
Q7N3A2	plu2817	29.4225	27.4615	3.89321	+	+
Q7MZH9	plu4308	29.7003	27.827	3.66354	+	+
Q7N1E3	plu3533	26.7762	24.9625	3.5154	+	+
Q7N1E9	plu3527	27.0194	25.2132	3.49715	+	+
Q7N1E6	plu3530	26.6161	24.8998	3.28581
Q7N641	plu1729	29.3535	27.6451	3.26805	+	+
Q7N1B1	plu3567	30.225	28.55	3.19333	+	+
Q7N4W0	hcaE	31.3845	29.7212	3.16742	+	+
Q7N1Y7	plu3327	28.055	26.3944	3.16157		+
Q7N643	plu1727	26.5432	24.8884	3.14886		+
Q7N577	luxC	27.4694	25.8264	3.12328		+
Q7MZT7	plu4187	30.841	29.2055	3.10687		+
Q7N574	luxB	30.577	28.962	3.06309		+
Q7N4D8	plu2403	28.2079	26.5968	3.05495		+
Q7N8L1	cysD	25.384	23.8113	2.97463
Q7N1E7	plu3529	25.6429	24.1302	2.85336
Q7N4V7	hcaB	31.8795	30.3765	2.8343		+
Q7MB50	plu1713	26.8241	25.3323	2.81253		+
Q7MZM3	plu4260	26.6499	25.1631	2.80259		+
Q7N2F7	plu3123	31.6397	30.1622	2.78468		+
Q7MZF5	plu4334	29.4438	27.9969	2.72607		+
Q7N642	plu1728	27.5907	26.1595	2.69678		+
Q7N849	plu0898	30.8796	29.4569	2.68085		+
Q7N595	plu2061	26.9694	25.5906	2.60065
Q7MZU3	plu4181	31.3223	29.9633	2.56504		+
Q7N848	plu0899	26.9062	25.5752	2.51563		+
Q7N6L3	plu1537	30.2086	28.9162	2.44932		+
Q7N9Z3	plu0158	33.2154	31.9289	2.43934		+
Q7MZT2	plu4192	26.4725	25.2064	2.40521		+
Q7MZ09	plu4502	29.6844	28.4371	2.37388		+
Q7N296	hutH	27.6626	26.4489	2.31937
Q7N525	rnd	26.7508	25.5402	2.31447
Q7MZM5	plu4258	30.8969	29.6904	2.30771		+
Q7N654	plu1715	26.9599	25.7733	2.27616		+
Q7MZT8	plu4186	27.6677	26.4889	2.26377		+
Q7N596	plu2060	29.8769	28.7244	2.22299		+
Q7N649	plu1720	26.7536	25.6079	2.2125		+
Q7N781	mprA	32.1343	30.9911	2.20864		+
Q7MZV5	tccA1	25.9085	24.7873	2.17532
Q7MYC6	rpmE	30.2987	29.191	2.15508		+
Q7MZT6	plu4188	27.8395	26.7476	2.13152		+
Q7MAX8	miaA	27.61	26.5252	2.12104
Q7MAZ2	plu4291	26.9125	25.8412	2.10138		+
Q7MZ55	fecA	26.9466	25.8985	2.06776		+
Q7N3Y2	tyrR	29.9506	28.911	2.05563		+
Q7N690	plu1672	26.0545	25.0197	2.04879		+
Q7N4V6	mhpB	31.057	30.0288	2.03939		+
