# Supplementary material for: Genome mining unearths a hybrid nonribosomal peptide synthetase-like-pteridine synthase biosynthetic gene cluster
Source: eLife. 2017 Mar 15;6:e25229. doi: 10.7554/eLife.25229 (PMC5384830; doi:10.7554/eLife.25229)
Supplement: Figure 8—source data 5. — Intensities from label-free quantification calculated using MaxQuant and log2 transformed. Intensities for biological triplicate samples are presented. Average fold change shown for WT compared with WTΔlocus. Two-tailed t-test performed using a cutoff of FDR = 0.01 and 2-fold signal difference, or p<0.05 (+ indicates statistical significance). DOI: http://dx.doi.org/10.7554/eLife.25229.033 [file elife-25229-fig8-data5.xlsx]

## Sheet: Sheet1
Uniprot ID	Gene ID	ΔHexA (log2intensity)	ΔHexAΔ (log2intensity)	Fold change (raw intensity)	Significance (FDR=0.01 S0=2)	Significance (P<0.05)
Q7N895	plu0840	26.91	30.1273	9.3007	+	+
Q7N751	gltI	26.0623	29.0726	8.05726	+	+
Q7N3M7	plu2688	26.5961	29.5321	7.65297	+	+
Q7N7H5	plu1174	28.9644	31.8445	7.36191	+	+
Q7N368	plu2853	30.0107	32.849	7.15187	+	+
Q7N8U8	tbpA	25.5119	28.2599	6.71753	+	+
Q7MZV2	plu4172	24.6985	27.0904	5.24837	+	+
Q7N7H4	plu1175	26.0246	28.3774	5.10825	+	+
Q7N516	hslJ	28.6595	31.0046	5.08099	+	+
Q7MB18	lsrB	26.1014	28.4228	4.9981	+	+
Q7N6G3	artI	25.1413	27.4242	4.86635	+	+
Q7N9U7	pstS	25.5882	27.8281	4.72368	+	+
Q7MAX5	ppc	32.91	35.1111	4.59823
Q7N9E5	argD	27.0737	29.236	4.47622	+	+
Q7N460	oppA1	26.9594	29.1091	4.43757	+	+
Q7N844	plu0903	25.7088	27.7769	4.19325	+	+
Q7MZ18	argI	29.5503	31.5362	3.96112	+	+
Q7N5L9	plu1929	26.1945	28.1683	3.92804	+	+
Q7N9K6	plu0318	30.3137	32.2744	3.8924	+	+
Q7N1E4	plu3532	26.7749	28.6975	3.79119
Q7N461	oppA2	30.7627	32.6735	3.76012	+	+
Q7N639	plu1731	26.2939	28.118	3.54084	+	+
Q7N816	plu0932	25.8201	27.5807	3.38841	+	+
Q7N9Q6	plu0258	25.2053	26.9651	3.38658
Q7N6H5	plu1575	27.4312	29.1878	3.37887		+
Q7N3L7	manY	25.6433	27.3777	3.32723
Q7MZX7	plu4132	27.5132	29.197	3.21264
Q7N3S4	plu2639	27.0809	28.74	3.15815
Q7N9M2	dppA	27.8544	29.4509	3.02411		+
Q7N6R5	modA	25.5162	27.1115	3.02157
Q7N3K0	ptrB	26.4941	28.0715	2.98425		+
Q7N9U2	plu0219	28.2336	29.7992	2.96007		+
Q7N0C6	plu3965	24.6463	26.1918	2.91911
Q7MB48	plu1732	26.2638	27.8001	2.90054		+
Q7N3G0	celF	28.0893	29.6251	2.89951		+
Q7MBH3	chb	29.362	30.8651	2.83441		+
Q7MZP7	plu4231	25.5012	27.0032	2.83231		+
Q7N0T6	plu3793	26.798	28.2952	2.82304		+
Q7N8S4	argA	25.6267	27.1208	2.8169		+
Q7N3D8	plu2779	29.1624	30.6415	2.78777		+
Q7N7D8	plu1212	25.4709	26.9374	2.76341		+
Q7N9E8	ppiA	25.316	26.7699	2.73942
Q7MYV3	plu4565	32.9176	34.3594	2.71667		+
Q7N8T2	plu0635	25.0403	26.4581	2.67193		+
Q7N9F5	dsbA	29.0071	30.3928	2.61302		+
Q7N814	plu0935	24.4011	25.7341	2.51936
Q7N9W8	plu0192	26.4114	27.7413	2.5138		+
Q7MYS3	plu4600	26.6228	27.9341	2.48167
Q7N3W4	anmK	28.0216	29.3119	2.44577
Q7N2P0	plu3036	26.2211	27.5029	2.43134
Q7N5U4	plu1840	31.9653	33.2333	2.40824		+
Q7MZC2	plu4370	28.173	29.4373	2.40219		+
Q7MZY7	glpQ	30.1114	31.3756	2.40194		+
Q7N065	plu4031	27.3916	28.654	2.39889		+
Q7N500	plu2160	25.8864	27.1484	2.3983		+
Q7MB81	plu0762	25.0237	26.2848	2.3967		+
Q7N2S5	cbiA	26.9824	28.2265	2.36872		+
Q7MYS0	plu4603	25.109	26.3482	2.36069
Q7MYR8	plu4605	26.0631	27.3004	2.3576		+
Q7N0Q3	ushA	28.606	29.8338	2.342		+
Q7N9N7	plu0280	29.549	30.7746	2.33846		+
Q7MZU8	plu4176	27.8346	29.0474	2.31795
Q7N561	plu2096	28.4472	29.6542	2.30851
Q7N3N1	plu2684	26.7542	27.9592	2.30537
Q7N740	plu1322	25.3239	26.5164	2.28548
Q7N2T3	cbiH	29.2298	30.4218	2.28468		+
Q7N371	dld	26.7661	27.9442	2.26279		+
Q7N2K8	katE	32.7303	33.9024	2.25336		+
Q7N2V6	plu2968	27.9067	29.0615	2.22653		+
Q7N7W2	hpaG2	27.8282	28.9754	2.21491		+
Q7MYV2	plu4566	31.7263	32.8595	2.19345		+
Q7N0I0	ggt	29.6558	30.7817	2.18229		+
Q7N564	plu2093	27.4702	28.5938	2.17892		+
Q7N024	plu4079	24.6761	25.7603	2.1202		+
Q7N2X0	plu2953	25.9768	27.053	2.10852
Q7MYD7	argB	29.3021	30.3732	2.10108		+
Q7MYW8	argR	29.6502	30.7173	2.09528		+
Q7N6S8	plu1463	25.6741	26.7301	2.07916		+
Q7MZN8	ppxB	25.7997	26.8537	2.07629
Q7N0G8	plu3921	26.4055	27.4438	2.05385		+
Q7MZC3	plu4369	26.239	27.277	2.05339
Q7MZI3	plu4304	26.4649	27.5008	2.05042
Q7MZL0	plu4273	26.0792	27.1073	2.03935		+
Q7NA21	plu0126	25.5	26.5165	2.0231		+
Q7N9H1	plu0365	24.6521	25.6529	2.00116
Q7N6H4	cipA	31.3519	32.3526	2.00101
