# Supplementary material for: Genome mining unearths a hybrid nonribosomal peptide synthetase-like-pteridine synthase biosynthetic gene cluster
Source: eLife. 2017 Mar 15;6:e25229. doi: 10.7554/eLife.25229 (PMC5384830; doi:10.7554/eLife.25229)
Supplement: Figure 8—source data 6. — Intensities from label-free quantification calculated using MaxQuant and log2 transformed. Intensities for biological triplicate samples are presented. Average fold change shown for ΔhexA compared with ΔhexAΔlocus. Two-tailed t-test performed using a cutoff of FDR = 0.01 and 2-fold signal difference, or p<0.05 (+ indicates statistical significance). DOI: http://dx.doi.org/10.7554/eLife.25229.034 [file elife-25229-fig8-data6.xlsx]

## Sheet: FIXED_HEXA.csv
Uniprot ID	Gene ID	ΔHexA-1 (log2intensity)	ΔHexA-2 (log2intensity)	ΔHexA-3 (log2intensity)	ΔHexAΔ-1 (log2intensity)	ΔHexAΔ-2 (log2intensity)	ΔHexAΔ-3 (log2intensity)	Average fold change (raw intensity)	Significance (FDR=0.01 S0=2)	Significance (P<0.05)
Q7N607	rmf	27.0308	27.6593	27.7667	24.8489	-	24.6741	6.60752	+	+
Q7MB87	plu0643	28.2001	28.1914	27.9708	25.2004	25.7167	26.2179	5.31132	+	+
Q7MY49	plu4844	32.7062	31.9472	32.4655	29.851	29.9335	30.3952	4.96921	+	+
Q7N195	ubiH	26.6816	28.6682	26.2191	-	-	24.93	4.78866
Q7N651	plu1718	28.2125	28.3203	28.0886	25.8833	26.1744	25.7886	4.78447	+	+
Q7N5Q8	plu1886	32.0254	-	-	30.3299	29.4134	-	4.44977
Q7N653	plu1716	-	-	25.4698	-	-	23.4012	4.19491
Q7N647	plu1723	28.5503	27.7789	28.8631	26.2419	26.2774	26.5387	4.12611	+	+
Q7N3A2	plu2817	29.3436	29.4491	29.4748	27.5709	27.6027	27.211	3.89321	+	+
Q7MZH9	plu4308	30.0046	29.318	29.7782	28.0404	27.7182	27.7226	3.66356	+	+
Q7N1E3	plu3533	26.738	26.6287	26.9618	24.7745	24.939	25.1739	3.5154	+	+
Q7N1E9	plu3527	27.1306	27.1925	26.7349	24.8812	25.437	25.3213	3.49716	+	+
Q7N1E6	plu3530	26.3919	26.3087	27.1475	-	-	24.8998	3.28582
Q7N641	plu1729	29.4682	29.2764	29.3161	27.7129	27.6046	27.6179	3.26803	+	+
Q7N1B1	plu3567	30.1672	30.2856	30.2223	28.3203	28.69	28.6396	3.19333	+	+
Q7N4W0	hcaE	31.4813	31.387	31.2852	29.4674	29.94	29.7561	3.16743	+	+
Q7N1Y7	plu3327	28.0472	28.5735	27.5443	26.4713	26.3174	-	3.16158		+
Q7N643	plu1727	26.5195	26.8148	26.2953	24.8416	-	24.9352	3.14887		+
Q7N577	luxC	27.454	27.3377	27.6167	25.973	-	25.6798	3.12328		+
Q7MZT7	plu4187	31.0144	31.0996	30.409	29.4334	29.2237	28.9595	3.10685		+
Q7N574	luxB	30.4377	30.3984	30.895	29.2092	28.1028	29.574	3.0631		+
Q7N4D8	plu2403	28.063	28.5495	28.0112	-	26.2641	26.9294	3.05493		+
Q7N8L1	cysD	24.4668	-	26.3012	-	-	23.8113	2.97463
Q7N1E7	plu3529	25.6429	-	-	23.788	24.4725	-	2.85335
Q7N4V7	hcaB	32.2029	31.8398	31.5957	30.4216	30.1253	30.5824	2.8343		+
Q7MB50	plu1713	26.7981	26.9472	26.7272	-	25.1791	25.4854	2.81253		+
Q7MZM3	plu4260	26.658	26.7704	26.5212	25.1342	25.192	-	2.80259		+
Q7N2F7	plu3123	31.6285	31.5531	31.7375	30.146	30.017	30.3236	2.78466		+
Q7MZF5	plu4334	28.8901	29.7463	29.6949	27.7824	-	28.2114	2.72606		+
Q7N642	plu1728	27.6838	27.5134	27.5749	26.2077	-	26.1113	2.69677		+
Q7N849	plu0898	31.2795	30.5214	30.838	29.5361	29.3202	29.5144	2.68086		+
Q7N595	plu2061	25.9888	27.0845	27.835	24.9514	25.4421	26.3782	2.60063
Q7MZU3	plu4181	31.0696	31.5977	31.2995	29.835	30.0417	30.0132	2.56503		+
Q7N848	plu0899	27.0002	26.3254	27.3929	25.6379	26.047	25.0408	2.51563		+
Q7N6L3	plu1537	29.928	30.6671	30.0305	29.0449	28.9453	28.7583	2.44932		+
Q7N9Z3	plu0158	33.3684	33.1554	33.1223	32.009	31.9621	31.8156	2.43934		+
Q7MZT2	plu4192	26.135	26.9487	26.3339	24.9325	25.5872	25.0994	2.40519		+
Q7MZ09	plu4502	29.7517	29.8342	29.4673	28.2605	28.6138	-	2.37388		+
Q7N296	hutH	27.9058	27.2816	27.8005	25.5635	26.9643	26.819	2.31936
Q7N525	rnd	-	-	26.7508	-	-	25.5402	2.31447
Q7MZM5	plu4258	30.799	30.9862	30.9055	29.7619	29.9058	29.4035	2.30772		+
Q7N654	plu1715	26.6148	27.2395	27.0254	25.5634	25.6718	26.0847	2.27615		+
Q7MZT8	plu4186	27.7802	27.4654	27.7574	26.3519	26.7713	26.3436	2.26377		+
Q7N596	plu2060	29.9986	29.8874	29.7447	28.8672	28.2966	29.0093	2.22299		+
Q7N649	plu1720	26.5012	26.6572	27.1023	25.7454	-	25.4704	2.21249		+
Q7N781	mprA	32.1852	32.5517	31.666	31.3427	31.0723	30.5585	2.20864		+
Q7MZV5	tccA1	25.4322	26.4871	25.8062	-	24.7873	-	2.17532
Q7MYC6	rpmE	30.2171	30.3173	30.3618	29.2964	28.8583	29.4183	2.15508		+
Q7MZT6	plu4188	28.1484	27.5973	27.7727	-	26.5254	26.9698	2.1315		+
Q7MAX8	miaA	28.7381	27.2561	26.8357	26.1986	26.6197	26.7572	2.12104
Q7MAZ2	plu4291	26.5739	26.9493	27.2145	25.5702	26.1122	-	2.10139		+
Q7MZ55	fecA	27.1029	27.0323	26.7045	26.2895	26.0117	25.3943	2.06776		+
Q7N3Y2	tyrR	30.1996	29.9935	29.6586	29.0328	28.7417	28.9585	2.05562		+
Q7N690	plu1672	26.031	25.9826	26.1498	24.813	25.0141	25.2319	2.0488		+
Q7N4V6	mhpB	31.1008	31.2141	30.8559	29.9567	29.9341	30.1957	2.03939		+
Q7MYF5	rpsS	30.9497	31.308	31.3948	30.5676	29.0321	31.0607	1.99641
Q7N5T4	cheD	25.242	-	26.1245	25.4734	23.8685	24.733	1.9884
Q7NA83	asnA	27.7176	27.8502	27.4258	26.279	27.0962	26.649	1.98594		+
Q7N556	cmoB	-	-	24.4825	-	-	23.4929	1.98568
P68682	rpsU	30.3827	31.8189	31.4643	30.7255	29.1816	30.8113	1.97588
Q7N8Y9	plu0571	27.6788	27.4613	26.5639	-	-	26.2648	1.95861
Q7N4V9	hcaF	30.1638	29.7827	29.8019	28.8951	29.0725	28.9041	1.94378		+
Q7N0M9	hha	-	26.7841	26.3693	25.6289	-	-	1.92898
Q7N576	luxD	26.7897	-	27.2856	25.9333	26.0629	26.2748	1.92827		+
Q7NA34	cynT	24.8943	24.8711	24.6833	23.8803	-	-	1.91313
Q7N929	plu0523	28.0252	28.1743	28.4331	26.9996	27.3116	27.5163	1.9119		+
Q7N7F9	lysA	26.3145	26.7442	26.5863	25.5794	-	25.6717	1.89578		+
Q7MYV6	plu4562	26.1168	26.1719	-	-	-	25.2312	1.88322
Q7N4V5	hcaD	28.1574	28.061	28.5465	27.0756	27.5633	27.3916	1.88092		+
Q7N1U2	plu3377	24.9538	25.054	-	24.0624	24.1328	-	1.87421		+
Q7MZ01	plu4510	27.6268	27.3883	27.7447	26.8219	26.4888	26.7479	1.86659		+
Q7N4D7	plu2404	31.7294	31.7181	31.8664	31.059	30.599	30.9712	1.85947		+
Q7MZM4	plu4259	28.8483	27.5839	27.6079	27.5327	27.0684	26.7553	1.85912
Q7N575	luxA	28.8205	28.8397	28.6663	27.7261	27.9624	27.9855	1.84564		+
Q7MZU4	plu4180	33.0289	32.9825	32.9591	32.2184	31.9725	32.1435	1.83869		+
Q7MY46	hldD	30.8106	30.4553	30.2573	30.0906	28.8524	29.9625	1.83096
Q7N598	plu2058	31.1367	30.6615	31.1855	30.4792	29.4245	30.5002	1.81495
Q7N759	rsfS	-	27.0187	-	26.1156	26.2056	-	1.81266
Q7N228	hscA	27.3654	28.1331	27.7702	27.0924	26.7838	26.8264	1.80916		+
Q7N148	murC	-	-	25.2028	-	-	24.3502	1.80576
Q7N6D2	ihfB	30.2556	30.3761	29.4909	29.143	28.9986	29.4248	1.80505		+
Q7MZT5	plu4189	30.5339	30.7142	30.6505	29.6454	30.0211	29.6794	1.8036		+
Q7N3W3	slyB	29.0566	28.4604	29.2095	-	-	28.0593	1.80189
Q7MZ84	tatA	28.9645	28.7647	28.1717	-	-	27.7854	1.80027
Q7MYF2	rplD	32.4714	32.3692	32.2818	31.7494	31.2087	31.6203	1.79999		+
Q7N1B2	plu3566	26.5376	-	26.2341	-	25.5395	-	1.79792
Q7MYN4	plu4641	27.1479	26.6506	-	26.3811	25.7267	-	1.79675
Q7N4I7	plu2350	30.12	29.7021	29.7927	29.444	28.5504	29.1025	1.78918		+
Q7N9Z4	cipB	28.4877	-	29.0297	-	-	27.9233	1.78433
Q7N802	plu0947	31.8898	32.2154	31.8748	31.12	31.2875	31.0775	1.77971		+
Q7N8L0	cysN	-	26.4914	26.6115	-	-	25.7311	1.76584
Q7N224	iscS	30.1035	30.4337	30.1924	29.2567	29.5838	29.4406	1.76074		+
Q7N3R6	plu2649	29.3431	29.5241	28.1149	28.1012	28.4631	27.9815	1.75574
Q7MY08	plu4890	28.6986	28.4847	28.4193	27.7095	27.8724	27.5986	1.74997		+
Q7N1E0	plu3536	26.4392	26.6956	-	25.7636	-	-	1.74577
Q7MZ03	plu4508	29.4584	29.3123	29.1905	28.3818	28.7831	28.3906	1.74343		+
Q7N6I0	hisG	27.7531	27.2904	27.5478	26.9824	26.7452	26.4767	1.73587		+
Q7N8U3	plu0624	27.1932	-	26.6738	-	-	26.1394	1.73404
Q7MZK1	plu4284	-	-	28.9666	27.8889	-	28.46	1.73169
Q7N3P5	plu2670	-	-	26.3534	-	25.5922	25.5419	1.72466
Q7N4U6	plu2219	27.809	27.5723	27.736	27.1731	-	26.6702	1.72202		+
Q7MYQ3	fhuE	28.6099	29.0171	28.2878	28.0051	27.239	28.3295	1.7176
Q7MZB9	zur	-	26.2795	25.5455	-	-	25.1327	1.71689
Q7N4C1	pyrF	26.0733	27.0134	-	-	25.7653	-	1.71479
Q7MB91	plu0507	25.8141	26.0018	25.4789	25.0248	24.8451	25.1006	1.71087		+
Q7MYU6	rlmB	27.4987	27.4045	27.3037	26.9258	26.752	26.2239	1.70333		+
Q7N993	plu0450	26.5514	26.5236	-	26.0143	25.5374	-	1.69548
Q7N788	clpB	32.1639	32.3359	32.2608	31.5808	31.511	31.4019	1.68833		+
Q7N9W6	glpD	25.9674	26.401	25.9432	25.9702	25.146	24.954	1.6785
Q7N154	plu3647	23.5509	-	-	22.8791	-	22.7294	1.6778
Q7N4Z6	plu2164	33.887	33.677	33.8942	32.8886	33.2545	33.0782	1.67675		+
Q7N837	mazG	26.6471	25.4626	26.3764	24.3852	26.0008	25.8663	1.67547
Q7N5I6	plu1962	29.1654	29.3417	29.7903	28.3232	28.7403	29.0096	1.67179
Q7MZ04	plu4507	26.043	25.987	26.3819	25.2677	25.6566	25.2644	1.67143		+
Q7N099	plu3994	35.4408	35.5078	35.1486	34.7228	34.7581	34.4015	1.66815		+
Q7NAB3	plu0021	26.9187	-	26.3463	25.974	25.8926	25.8496	1.65534		+
Q7N540	plu2120	-	-	25.0531	24.4524	24.4104	24.1227	1.65246
Q7MYC1	hslU	32.2377	32.6054	32.2038	31.4752	31.8368	31.5622	1.65198		+
Q7M7F4	ISPlu2E	-	-	24.2189	-	-	23.5018	1.64387
Q7MYH6	rplQ	31.0744	30.9448	31.0247	30.4063	30.1947	30.2921	1.64371		+
Q7N4D5	plu2406	30.7057	31.0132	30.2122	30.2391	29.6475	29.8991	1.64163
Q7N387	acpP	30.4469	-	29.8253	-	-	29.4239	1.63831
Q7N6X9	seqA	26.6709	27.3635	26.5614	25.8593	26.216	26.3847	1.63801
Q7N105	plu3721	28.4239	28.0466	28.5785	27.5131	27.7077	27.6926	1.63793		+
Q7MZI0	rtcB	26.2302	-	26.7183	26.1308	-	25.3997	1.63473
Q7N223	iscR	26.278	26.1803	27.0712	25.676	25.9668	25.7658	1.63241
Q7N3X7	pspA	28.9273	29.0465	28.6885	28.3448	27.9334	28.2635	1.63224		+
Q7N454	plu2500	25.8473	26.0011	25.8647	25.4829	24.861	25.2731	1.62302		+
Q7MY30	rpmG	31.076	31.1094	31.4423	31.0372	30.1426	30.371	1.61587
Q7MZ73	metR	-	23.5873	-	22.8957	-	-	1.61506
Q7MYX2	plu4544	-	-	25.2013	-	-	24.5162	1.60779
Q7N766	lipB	-	24.7227	-	-	24.0392	-	1.60601
Q7MY44	rfaC	-	-	25.4073	-	-	24.7261	1.60348
Q7MZW2	plu4153	-	22.5507	-	-	21.8718	-	1.60084
Q7N4Z7	plu2163	30.2456	30.0847	30.0894	29.6673	29.172	29.5463	1.59994		+
Q7N640	plu1730	27.3128	26.9982	27.4385	26.4153	26.7786	26.5228	1.59948		+
Q7N3I5	plu2731	25.4783	25.8412	25.9003	24.7303	25.1518	25.3131	1.59645		+
Q7N0P4	htpG	33.0496	33.3569	33.2403	32.2744	32.6537	32.6942	1.59639		+
Q7N5A6	plu2050	25.6181	-	25.6699	-	-	24.9787	1.58596
Q7N2A7	tctC	27.8577	28.0252	28.1301	27.1831	27.2614	27.5739	1.5854		+
Q7N295	hutU	27.7249	27.4276	27.6689	26.9025	27.1345	26.7976	1.58257		+
Q7MYY0	rlmE	27.159	27.5113	27.327	-	26.7967	26.5454	1.58158		+
Q7N414	plu2543	26.7246	26.2894	26.3611	25.7696	25.9208	25.7106	1.5779		+
Q7MY51	plu4841	-	25.5617	-	-	-	24.909	1.57209
Q7N747	plu1311	28.5169	28.7835	28.6027	28.1694	28.1585	27.6174	1.57201		+
Q7N6I1	hisCD	27.7914	27.2027	28.3996	27.6265	26.9992	26.8124	1.57121
Q7N3F4	ppk	-	-	23.7257	-	-	23.0741	1.57082
Q7N829	plu0919	29.9925	29.5404	29.9123	29.1498	29.3714	28.9716	1.57005		+
Q7N464	oppD	28.0435	28.504	27.8992	27.4545	27.6575	27.3913	1.5668		+
Q7N594	plu2062	26.1965	26.3339	27.0949	25.7108	-	26.0841	1.56294
Q7N9G5	plu0371	25.3191	26.7025	26.1835	25.8408	24.4471	25.9963	1.55866
Q7N4B4	topA	29.8008	29.7632	29.9749	29.0857	29.3357	29.1968	1.55857		+
Q7N8L5	cysI	26.8536	27.1955	26.8674	26.3707	26.3009	26.3282	1.55715		+
Q7NA49	nudE	26.6405	26.5918	26.7209	25.9454	25.8908	26.213	1.55255		+
Q7MBA0	plu0284	-	-	24.4809	-	-	23.8464	1.55235
Q7N5Y6	plu1793	30.3368	30.356	30.4835	29.9517	29.3433	29.9783	1.55225		+
Q7N400	msrB	-	27.069	-	26.4367	-	-	1.54996
Q7N0R1	plu3820	31.7142	31.7193	31.6564	31.089	31.1322	30.977	1.54812		+
Q7N106	plu3720	27.21	25.8907	26.7104	26.2084	26.0915	25.6199	1.54806
Q7N597	plu2059	32.0151	31.9464	31.6689	31.6189	31.1941	30.9261	1.54802
Q7N351	plu2871	26.5793	26.5387	-	25.9296	25.9418	-	1.54037		+
Q7N3J6	narP	29.2557	29.3222	29.1214	28.3499	28.7959	28.6862	1.53949		+
Q7N9A5	rplL	32.8261	32.8893	32.0383	32.2008	32.2501	31.4404	1.53772
Q7N0F2	plu3938	26.5929	26.549	26.1511	26.1758	25.5448	25.712	1.53705
Q7N4W3	plu2201	28.9006	28.8349	28.4652	28.1482	28.2026	28.0034	1.53213		+
Q7N0B6	tsaD	25.992	26.0965	26.3316	-	-	25.5279	1.52851
Q7N573	luxE	24.4532	24.9169	24.4858	-	24.0082	-	1.52669
Q7N966	thiG	27.0216	26.5926	26.5121	-	-	26.0996	1.52534
Q7N4K1	plu2336	28.1416	27.1955	28.5681	27.2057	27.5508	27.3288	1.52269
Q7MAZ7	groL	36.2004	36.135	36.0761	35.5799	35.5562	35.4558	1.52261		+
Q7N972	plu0475	28.9618	28.5282	28.4647	28.4795	27.7596	27.9008	1.52091
Q7MZY8	glpT	-	-	25.3447	-	24.668	24.8168	1.51808
Q7MYX5	rpmA	29.9777	29.1126	30.2684	-	28.9829	29.3876	1.51679
Q7N8Y3	dnaJ	31.3577	31.3074	31.2084	30.8725	30.5959	30.6066	1.51515		+
Q7MYL2	rhlB	27.3803	26.637	28.1082	26.2736	26.8969	27.1651	1.51217
Q7N3T1	hmuR	27.025	27.0863	26.752	26.2733	26.487	26.3219	1.50909		+
Q7N973	plu0474	30.8869	30.5216	30.5759	30.6473	29.6156	29.9431	1.50819
Q7N1F3	plu3523	-	-	26.0011	-	25.6076	25.2123	1.50639
Q7MZ14	pyrI	29.5207	29.1821	29.0977	28.5575	-	28.8011	1.50266
Q7MY04	plu4895	30.9621	30.9591	30.7888	30.4175	30.3671	30.1645	1.50209		+
Q7N0N1	acrA	31.2194	31.1839	31.2561	30.6238	30.7214	30.5757	1.49436		+
Q7N139	rsmH	27.1605	27.1295	27.3112	26.7938	26.6934	26.383	1.49174		+
Q7N0I7	nrdR	27.2855	27.3011	27.0821	26.9014	26.5202	26.5164	1.49166		+
Q7N3T3	aroH	27.9238	27.5591	27.1782	27.1394	27.198	26.5972	1.4902
Q7MZ46	plu4457	25.8397	26.369	26.739	-	25.5985	25.8854	1.48859
Q7N6L8	plu1531	-	-	25.282	-	-	24.7088	1.4878
Q7N874	plu0867	-	-	26.4735	25.9044	-	-	1.48364
Q7NA86	mnmG	27.9074	28.0634	27.5366	27.1153	27.4897	27.1963	1.4832		+
Q7N0E1	parC	27.1412	27.5153	27.1889	26.0375	26.9947	27.1239	1.47742
Q7NA47	hslR	-	25.0919	-	-	24.5369	-	1.46911
Q7N0C4	plu3967	27.9384	27.9358	28.064	27.412	-	27.4407	1.4672		+
P60054	plu2870	27.0231	26.8039	26.9105	26.5463	26.1982	26.3463	1.46295		+
Q7N011	plu4093	30.6989	31.1493	31.0341	30.5533	30.4163	30.2847	1.45664		+
Q7MZ48	plu4453	26.6151	26.977	26.7148	25.7849	26.4921	26.4057	1.4554
Q7N076	plu4017	27.682	28.8104	28.6059	27.6401	27.7677	28.0719	1.45346
Q7N4I1	tus	25.6866	24.6077	25.4228	24.6137	-	24.7892	1.45151
Q7N8N2	dnaE	25.7517	-	25.2749	-	-	24.9767	1.4505
Q7N3K5	plu2710	23.8326	-	-	-	-	23.2961	1.45039
Q7N704	plu1378	28.3128	27.9171	28.1164	27.4951	27.7306	27.5157	1.44893		+
Q7N9L9	dppD	27.5133	26.7083	26.1176	26.4589	-	26.0307	1.44892
Q7MYG3	rplE	31.9024	32.0633	32.2663	31.5423	31.6993	31.3862	1.44866		+
Q7MYC2	hslV	30.0696	29.6601	29.8752	29.7342	29.3117	28.9567	1.44804
Q7N060	plu4037	-	-	26.4493	-	-	25.9198	1.44339
Q7N943	plu0506	23.413	-	23.6497	-	-	23.0032	1.44208
Q7N2B5	accD	30.6089	30.8542	30.7058	30.4099	30.1957	29.984	1.44036		+
Q7MY84	wblH	31.0535	30.3942	30.5882	30.3632	29.5792	30.5216	1.43788
P67903	rpsJ	32.4389	32.8015	32.6111	32.103	31.9685	32.2091	1.43758		+
Q7MYQ4	plu4621	26.5209	26.3524	26.4523	25.8379	26.1367	25.782	1.43691		+
Q7MYI0	rsmB	25.7317	25.9459	25.2009	25.1483	25.24	24.935	1.43237
Q7N5R0	plu1884	31.5655	31.6863	31.4993	31.1154	31.0947	30.9911	1.43063		+
Q7N189	rpiA	28.8115	28.8994	28.6727	27.5107	28.7628	28.562	1.43002
Q7N9F3	plu0383	28.1338	28.0494	28.0693	27.5719	27.1422	28.0002	1.42676
Q7MYF9	rpmC	31.6196	31.1891	30.9001	31.1407	30.7456	30.2846	1.42665
Q7N373	plu2846	-	26.1676	26.5686	-	25.8517	25.8595	1.42656
Q7N586	prfA	26.4405	26.8948	26.4055	26.3528	25.8	26.0593	1.42364
Q7MYX3	ispB	-	26.6506	27.1263	26.1767	26.5245	26.4422	1.42146
Q7N089	diaA	-	24.9241	-	24.4169	-	-	1.42128
Q7N2N1	plu3045	27.7201	26.4261	26.5706	26.3555	26.3965	26.4437	1.4211
Q7N0Y6	wzc	27.9661	27.9254	28.8103	27.7657	27.5548	27.8619	1.42058
Q7N6B6	plu1640	-	-	25.0331	-	-	24.5275	1.41975
Q7MZ28	plu4480	-	-	25.3676	-	-	24.8624	1.41927
Q7N3U1	sufA	-	26.0418	25.9102	-	-	25.4721	1.41804
Q7N0J9	thiI	26.363	25.7172	25.8365	25.464	-	25.473	1.41792
Q7N3J8	plu2718	28.6161	28.4454	28.1592	27.9349	28.0385	27.7411	1.41629		+
Q7MYC3	ftsN	25.741	25.7148	25.6717	25.0358	25.5163	25.0694	1.41618		+
Q7N994	plu0449	26.5608	26.4667	26.3955	26.2524	25.5305	26.142	1.41358
Q7N4U8	plu2217	26.5763	-	26.4684	-	26.1662	25.882	1.41249
Q7MZV8	plu4163	26.5417	26.3	26.3258	26.0048	25.7989	25.8728	1.41127		+
Q7N9B8	plu0425	29.4791	29.475	29.3923	29.0687	28.8769	28.9122	1.41051		+
Q7NA96	glmU	28.7529	28.7929	28.3811	28.3844	28.1266	27.9275	1.41043
Q7N5R1	plu1883	32.017	31.9607	31.9046	31.3564	31.6393	31.4046	1.40832		+
Q7N992	plu0451	26.3538	26.3449	26.2346	25.8291	-	25.8061	1.40784		+
Q7N108	plu3714	-	-	24.2728	23.7195	23.8402	-	1.40729
Q7MYU9	rplI	32.5353	32.8449	32.4574	32.1667	32.0944	32.0979	1.40719		+
Q7N510	hrpA	26.6814	26.5284	27.1191	26.004	26.0019	26.8507	1.40518
Q7N2I8	nuoB	28.7839	28.1164	28.8101	28.4062	27.559	28.2766	1.40399
Q7N8Y4	dnaK	34.0115	34.1262	33.7927	33.4894	33.5765	33.4004	1.40253		+
Q7N838	relA	28.013	28.2046	28.2788	27.6172	27.6459	27.7702	1.40223		+
Q7N2J4	nuoI	27.9461	27.9548	27.7462	27.6712	27.2771	27.2404	1.4007		+
Q7N6N5	rhlE	26.4204	26.8698	26.901	26.4423	25.99	26.3037	1.39971
Q7MY29	rpmB	30.3877	30.7906	30.764	30.447	-	29.8792	1.39893
Q7N593	plu2063	28.1086	28.119	28.3741	27.8139	27.6232	27.7142	1.39815		+
Q7N3P7	infC	29.8932	30.1171	29.9871	29.5156	29.6286	29.4077	1.39652		+
Q7N5A1	pth	-	-	25.8959	25.6207	-	25.2081	1.39625
Q7N0I6	secF	27.3652	27.9122	27.5429	26.6113	27.4962	27.2745	1.39419
Q7N9S6	glnA	29.1332	29.1703	28.917	28.8383	28.4649	28.4818	1.3933		+
F5HGM6	cpmA	30.3682	30.2456	30.2148	30.2063	29.3521	29.8408	1.39131
Q7N8K3	pcm	-	-	23.9508	-	-	23.4772	1.38862
Q7N612	rlmL	28.9064	28.9419	29.2552	28.6997	28.2482	28.737	1.38789
Q7N3P6	thrS	29.6908	30.1653	29.8307	29.5944	28.9955	29.6813	1.3869
Q7N0Y1	plu3748	29.8056	30.1245	29.3127	29.5597	29.3529	28.9214	1.38471
Q7N2J2	nuoG	30.5252	30.8901	30.6068	30.2637	30.0025	30.3515	1.38333		+
Q7N538	zwf	29.7076	29.8485	29.3341	29.1314	29.1172	29.2385	1.3829		+
Q7N7H8	plu1171	28.8879	28.626	28.2171	29.2705	-	26.9556	1.37932
Q7N4C0	lapB	24.5326	-	-	24.0694	-	-	1.37861
Q7N9A6	rplJ	32.8852	33.1928	32.8156	32.5207	32.5624	32.4252	1.37721		+
Q7N3D4	cspC	28.2035	-	29.2752	27.8237	-	28.7317	1.37714
Q7N0D4	plu3956	28.4613	29.4176	28.3232	28.3396	28.3173	28.1671	1.37499
Q7MY91	wblB	29.09	29.1707	29.1547	28.9161	28.229	28.8928	1.37473
Q7MY27	dfp	26.2121	-	26.3484	-	-	25.8238	1.37221
Q7N5Q9	plu1885	32.1683	32.44	32.0269	31.6754	31.8932	31.6976	1.37205		+
Q7MYE1	plu4738	26.1966	-	25.9936	25.5524	25.7777	25.5867	1.37193		+
Q7N2K5	menB	29.7345	29.4123	29.3897	29.4611	28.6797	29.0352	1.36936
Q7N129	leuA	29.9591	30.1599	30.2297	29.6869	29.654	29.6477	1.36923		+
Q7MAX2	rph	26.5928	26.3345	26.5423	26.0365	-	-	1.36918
Q7N4D3	plu2408	30.4492	30.0772	30.8311	29.9928	29.6825	30.3242	1.36857
Q7N1W6	srmB	28.7724	28.7352	28.9018	28.3294	28.3758	28.353	1.36643		+
Q7N547	ruvB	26.1933	26.278	26.3113	25.1384	26.2214	26.0833	1.36271
Q7N3Y7	ttcA	25.4569	25.7088	-	25.1381	-	-	1.36105
Q7N1Z5	plu3316	-	-	25.7307	24.9689	25.6081	25.2812	1.36097
Q7MYY9	rpsO	31.7565	31.4597	31.2717	31.2674	31.0081	30.8804	1.36033
Q7N059	lptC	25.4489	-	25.0566	24.7172	-	24.9014	1.35992
Q7N6L4	plu1536	-	-	26.4594	26.0807	-	25.9535	1.35876
F5HC75	cpmC	31.517	31.3009	31.0957	31.1038	30.6085	30.875	1.35857
Q7N9R4	plu0250	29.7633	29.9705	30.008	29.3535	29.5256	29.5381	1.35801		+
Q7MY94	cpxR	26.4161	26.5883	26.5589	26.4817	26.1418	25.6188	1.35696
Q7MZY6	epmA	26.4813	26.2858	26.4263	25.6344	26.1286	26.1099	1.35677
Q7N6I8	plu1562	26.8301	27.0788	26.774	26.0069	26.9516	26.4165	1.35283
Q7N941	plu0510	26.3295	26.2641	25.7777	24.7978	26.5221	25.7543	1.34945
Q7N746	ubiF	-	24.4116	-	23.7701	24.1939	-	1.34691
Q7MYU1	hflX	26.4351	26.4644	26.2507	25.9151	25.8764	26.0717	1.3463		+
Q7N0R4	ybbA	25.9035	-	26.0885	25.4406	-	25.6955	1.3453
Q7N8N8	skp	30.6171	31.0224	29.8695	30.2518	30.1604	29.815	1.34469
Q7N624	ompN	33.3235	33.7128	33.6212	33.0523	33.2696	33.0598	1.34281		+
Q7N0I1	ahpC	33.8205	33.7346	33.4982	33.2381	33.3866	33.1579	1.34123		+
Q7N0L3	clpP	30.6887	30.8587	30.6918	30.2817	30.345	30.3419	1.34119		+
Q7MYX4	rplU	31.4409	31.1761	30.7599	31.1141	31.0429	29.9564	1.33898
Q7N3K2	xseA	25.3314	25.4929	24.7841	-	-	24.7819	1.33878
Q7MYB8	zapB	32.1423	31.5171	31.471	31.1066	31.4899	31.2723	1.33839
Q7N8P9	glnD	25.4697	-	25.663	25.1915	24.723	25.5239	1.33813
Q7N456	hns	33.2617	33.5175	33.1254	32.7994	33.0881	32.7635	1.33595
Q7N5J1	putA	32.2344	32.2059	31.9593	31.8175	31.5266	31.8055	1.33485		+
Q7N9C2	yheS	28.9	28.097	28.4393	28.4672	27.6302	28.0896	1.33465
Q7MYY7	infB	32.4082	32.5286	32.4751	31.9558	32.1322	32.0817	1.33245		+
Q7MZT0	plu4194	31.8014	31.8516	31.5575	31.2248	31.6325	31.1115	1.33226
Q7N0I8	ribD	28.3782	28.5655	27.9857	27.6992	27.9497	28.039	1.33221
Q7N852	plu0895	24.4712	24.1549	-	24.0037	23.9243	23.7703	1.33203
Q7NA57	damX	28.1921	28.8091	28.53	28.1701	28.0388	28.0877	1.33008
Q7M7E6	plu1127	25.5794	25.95	25.5768	25.3155	25.4555	25.1043	1.32896
Q7MYG4	rpsN	31.7244	30.7763	31.0317	31.2197	-	30.3154	1.32859
Q7MYX6	obg	28.1553	28.0971	28.4531	27.6177	27.889	27.9736	1.32725
Q7N119	metK	30.6922	30.6091	30.6013	30.2293	30.2355	30.2141	1.32677		+
Q7MY13	plu4883	26.2035	-	25.8516	25.7681	-	25.4727	1.32608
Q7MB63	miaB	27.7247	27.6543	27.6039	27.2822	27.1974	27.288	1.32417		+
Q7N6I2	hisB	26.7902	27.2263	27.0052	26.4657	26.6667	26.6745	1.32401		+
Q7N207	plu3302	-	-	26.8412	26.3934	-	26.4797	1.32376
Q7MYF4	rplB	33.2644	33.1929	33.1334	32.9704	32.7025	32.7227	1.31806		+
Q7MYH4	rpsD	33.348	33.2478	33.1492	32.9271	33.0345	32.5885	1.31796
Q7N0L5	lon	32.3929	32.5507	32.148	32.061	32.0349	31.8081	1.31575		+
Q7MY92	wblA	29.2859	29.4829	29.4069	29.1878	28.8258	28.9797	1.31417		+
Q7N9G4	plu0372	26.4518	-	26.394	26.2051	-	25.8529	1.31395
Q7MXZ6	plu4903	27.9641	27.8747	27.9744	27.5216	27.5525	27.5647	1.31173		+
Q7N4A7	plu2442	-	-	24.3683	-	-	23.9772	1.31137
Q7N7C9	plu1223	28.7325	-	28.1154	28.5026	-	27.5642	1.31095
P60110	hutG	28.1516	28.1636	27.6156	28.1117	26.5869	28.061	1.31074
Q7N469	tonB	25.2018	25.3851	-	25.0904	24.6785	24.9406	1.31063
Q7N8R4	rlmM	-	-	25.5783	-	-	25.1883	1.31042
Q7MY83	wblI	-	-	24.9423	-	-	24.5554	1.3076
Q7MBH2	ligA	29.9705	29.982	30.1056	29.5797	29.7555	29.5652	1.30667		+
Q7N360	plu2861	26.2299	-	26.4227	-	-	25.9412	1.30593
Q7N9L1	plu0311	29.2155	29.2556	28.9896	29.1123	28.2809	28.9175	1.30432
Q7MZ16	pyrB	28.6802	28.0913	27.9887	28.2133	27.2711	28.1261	1.30429
Q7N1U4	smpA	28.1582	28.4771	-	27.6897	28.1803	-	1.30375
Q7N4D1	plu2410	28.0968	28.0132	27.9159	27.8928	27.1759	27.8112	1.30317
Q7N8V1	rapA	26.6157	26.7821	26.1731	26.0306	26.0564	26.34	1.30252
Q7N5V5	plu1827	28.6474	27.6664	28.957	28.0399	27.5144	28.5739	1.3021
Q7N7F4	nqrA	29.0522	28.9741	29.0588	28.6612	28.7506	28.5379	1.29996		+
Q7N9P0	plu0277	25.9612	26.1761	-	25.4878	25.8964	-	1.2982
Q7N0L6	hupB	30.5645	30.1794	30.1747	30.3168	29.824	29.6489	1.29801
Q7N6D8	plu1617	24.3102	-	-	23.9353	-	-	1.2968
Q7N2I0	pta	30.7458	30.9656	30.5326	30.3906	30.4166	30.3121	1.29676		+
Q7N3F8	upp	29.4145	29.4716	29.3616	29.0265	28.9362	29.161	1.29652		+
Q7N7E8	apbE	27.2245	27.0803	27.2158	26.5684	27.2333	26.597	1.29589
Q7N8V7	rsmA	27.4748	-	26.5241	27.067	-	26.1854	1.29527
Q7MB85	cysH	-	25.3006	-	25.1149	24.6862	24.9839	1.29439
Q7N5C0	plu2034	-	27.5174	27.0856	26.9418	-	26.9175	1.29401
Q7MB01	tgt	26.3552	26.3621	26.1425	25.9394	26.1207	25.6875	1.29302
Q7MYI8	plu4689	-	-	27.0523	26.6932	26.5409	26.8136	1.29207
Q7N3Q1	pheT	30.7285	30.8081	30.761	30.4014	30.312	30.4789	1.29094		+
Q7N6N0	plu1516	25.065	-	-	24.6971	-	-	1.29053
Q7N587	hemA	24.2039	-	-	23.8362	-	-	1.29025
Q7N7A0	rpsP	31.8159	31.2684	31.8516	31.2166	31.0554	31.5615	1.29004
Q7NA56	aroB	27.8861	28.2392	27.9284	28.1842	27.0668	27.7025	1.28939
Q7N8N5	lpxA	29.7251	29.8815	29.6621	29.1008	29.5858	29.4887	1.28738
Q7MYF3	rplW	30.6096	30.2838	30.1001	29.9299	29.9539	30.0165	1.28736
Q7N4U5	plu2220	27.4991	27.0165	28.4541	26.5838	27.5061	27.7904	1.28621
Q7N9S5	typA	29.3143	29.3499	29.0945	29.1849	28.7953	28.6982	1.28354
Q7N4T3	plu2234	31.2717	31.2815	31.0849	30.9208	31.0024	30.6356	1.28319		+
Q7N287	fadI	25.973	26.2759	25.996	26.1391	25.8515	25.1767	1.28272
Q7N2I9	nuoC	30.4549	30.4609	30.6582	30.3462	29.9485	30.2038	1.2821
Q7N738	dinJ	26.774	26.8884	26.5494	26.4842	26.5803	26.0725	1.28191
Q7N628	plu1744	28.1123	27.8223	27.9791	28.0734	27.5094	27.2581	1.28128
Q7N6J4	udk	27.4788	27.5742	27.4279	27.1047	27.1124	27.1915	1.28114		+
Q7N8X4	rpsT	30.5404	30.6885	30.717	30.4326	-	30.1505	1.28084
Q7N4D0	plu2411	29.7972	29.6147	29.5274	29.3787	29.1076	29.3829	1.28047		+
Q7MYW7	mpl	26.9725	27.343	27.1015	27.0945	26.4809	26.7754	1.27933
Q7N6W3	plu1424	29.9582	29.9288	29.1599	29.8052	29.3906	28.785	1.27928
Q7N3W8	gst	33.0331	32.9018	32.6761	32.5196	32.4702	32.5689	1.27525		+
Q7N200	plu3311	29.1159	29.2364	29.0218	28.9141	28.712	28.6975	1.27467		+
Q7N4F7	rnfG	24.3734	-	23.8182	-	-	23.7466	1.27383
Q7MYG5	rpsH	31.5442	32.0448	31.6753	31.5826	31.3498	31.2849	1.27366
Q7N012	plu4092	31.2375	31.2974	31.4451	30.9943	30.8062	31.1337	1.27331		+
Q7N8K4	surE	26.3351	26.5753	26.2415	26.1623	26.2004	25.7439	1.27318
Q7MYH5	rpoA	32.6274	32.7926	32.4123	32.2633	32.3708	32.1653	1.26954
Q7N5Y5	plu1794	29.0408	28.3994	27.9627	28.3163	27.8773	28.1819	1.26793
Q7N000	ftsY	28.4794	28.3712	28.5353	28.3975	27.6915	28.27	1.26778
Q7MYK9	ilvC	30.3044	30.5718	30.3842	30.0496	30.1189	30.0657	1.26757		+
Q7NA37	plu0108	29.3952	29.6396	29.3436	29.2404	29.1561	28.9709	1.26309		+
Q7N7A5	alaS	30.025	30.3406	30.337	29.8115	29.8574	30.0317	1.26053
Q7N9U3	phoU	27.3922	28.1738	27.7947	27.1515	27.8779	27.3324	1.2596
Q7MZ05	plu4506	26.9176	26.582	26.8277	26.933	26.0341	26.3628	1.25918
Q7MB22	mnmA	-	-	26.1091	-	-	25.7773	1.25859
Q7N081	sspB	27.6976	27.8906	27.9096	27.4097	27.6954	27.3998	1.25784		+
Q7N035	plu4068	-	-	24.4487	-	-	24.1185	1.25718
Q7N3D7	plu2780	-	-	25.6707	-	-	25.3425	1.25544
Q7N4I4	plu2353	27.8499	28.4706	28.3493	28.1178	27.7182	27.85	1.25519
Q7N185	argP	26.8287	26.6164	26.3109	26.3358	26.6856	25.7542	1.25422
Q7N611	uup	26.9336	26.9897	26.8792	26.3482	26.4666	27.0079	1.25407
Q7N548	ruvA	26.3456	27.2	26.8945	26.7708	26.7281	25.9619	1.25395
Q7N6K9	plu1541	30.0688	28.8372	29.2389	30.1376	27.4071	29.6344	1.25002
Q7MY02	selA	24.6922	25.0146	24.813	24.3821	24.5801	24.5929	1.24971
Q7N196	visC	24.7853	-	25.3998	24.3904	25.21	24.7219	1.24697
Q7N0J8	xseB	27.1499	27.622	-	27.0168	27.1236	-	1.24465
Q7N3Q2	ihfA	31.7128	31.404	31.4256	31.4676	31.2437	30.8881	1.24343
Q7N6C8	plu1628	30.1002	30.2312	30.4402	29.8489	29.9077	30.0737	1.243
Q7N8M3	metI	23.8057	-	-	23.4936	-	-	1.24147
Q7N227	hscB	25.367	25.9255	25.4991	25.3097	25.2475	25.3019	1.24042
Q7N0F0	exbD	-	-	26.669	26.4335	-	26.2841	1.23988
Q7N828	plu0920	-	27.7646	27.8442	-	27.6596	27.329	1.2398
Q7N791	bamD	28.316	28.2165	28.17	27.9441	28.2092	27.6195	1.23962
Q7N0J1	thiL	24.0062	-	-	-	-	23.6964	1.2396
Q7N569	plu2088	25.732	-	25.8084	25.3347	-	25.5887	1.23845
Q7NA33	cynS	-	-	25.98	-	-	25.6749	1.2355
Q7N9T0	plu0233	25.9253	26.3375	25.9385	-	-	25.7631	1.23457
Q7N3H1	dapA	29.472	29.4844	29.4227	29.1221	29.2498	29.0969	1.2341		+
Q7N2J1	nuoF	29.5647	29.7671	29.4901	29.3151	29.1896	29.4105	1.23303		+
Q7MYF8	rplP	30.9094	31.1573	30.9917	30.7911	30.6593	30.7017	1.23292		+
Q7NA25	gdhA	28.3336	28.3154	28.5523	28.2688	27.9922	28.0348	1.2327
Q7MXZ4	yidC	27.1467	27.1195	26.9877	26.6207	26.8976	26.8328	1.23194		+
Q7N7G9	plu1180	25.4397	25.8922	-	25.0469	25.7269	25.3251	1.23081
Q7N756	lptE	26.8833	27.2579	27.0034	26.5287	27.0438	26.6749	1.23033
Q7N9F1	polA	28.9986	29.101	28.9396	28.7442	28.7322	28.6704	1.22901		+
Q7N225	nifU	28.7178	29.0613	28.8242	28.818	28.6828	28.211	1.22875
Q7N151	ftsA	26.606	-	26.7881	26.3618	-	26.4393	1.22813
Q7MAZ6	groS	33.6968	32.9044	33.5705	33.4869	32.7544	33.0443	1.22719
Q7N526	fadD	29.6654	29.4972	29.5903	29.1312	29.3065	29.4302	1.22689		+
Q7N1A9	plu3572	-	-	25.8801	25.4755	-	25.6955	1.22652
Q7N4U4	plu2221	28.9631	28.9159	29.2184	28.753	28.2614	29.1994	1.22643
Q7N869	panB	26.3996	25.9987	-	26.3579	25.8183	25.5396	1.22594
Q7N908	serB	26.0573	26.1994	26.3062	25.8726	25.6504	26.1624	1.22475
Q7N7V2	plu0999	26.4354	26.7899	26.2341	26.1265	26.2821	26.1744	1.22443
Q7N6L2	ybiT	28.7491	28.5554	28.8905	28.7278	28.0995	28.4931	1.22393
Q7N8K5	truD	24.1727	24.5071	-	24.0485	-	-	1.22377
Q7N749	corC	-	26.642	26.1246	-	-	26.0928	1.22305
Q7N6F0	ftsK	24.2556	-	-	23.8998	-	24.031	1.22281
Q7N298	prmB	27.7266	28.1796	27.8173	27.7394	27.5995	27.5159	1.2223
Q7MBA2	spoT	-	-	24.7484	-	-	24.46	1.22129
Q7N4Q1	plu2271	30.7309	30.454	30.5917	30.1459	30.453	30.3136	1.22096
Q7N0N0	acrB	30.0938	30.3468	30.0994	29.7661	30.1872	29.7245	1.22046
Q7N004	garK	25.6087	25.7515	-	25.2257	-	25.5598	1.22041
Q7N8P4	frr	31.4509	31.5642	31.0317	31.3844	31.1719	30.6289	1.22027
Q7MB98	crp	31.819	32.0747	31.6459	31.6553	31.5579	31.465	1.22025
Q7N6Y9	ptsI	28.7667	29.0165	28.8729	28.7071	28.3989	28.6897	1.21992
Q7N4P4	ccdA	26.2914	26.297	26.1811	26.0779	26.0313	25.8003	1.21982		+
Q7MY52	plu4840	26.5746	26.7153	26.4553	26.3459	-	26.2446	1.21967
Q7MYF6	rplV	31.1594	30.8114	31.2144	31.1765	30.4484	30.7068	1.218
Q7N957	dbhA	30.5669	-	30.9838	30.2322	-	30.7513	1.21724
Q7N2N7	plu3039	25.1336	-	25.4871	-	-	25.0269	1.21708
Q7NA26	pitA	25.9745	26.0561	25.7054	25.6486	25.744	25.4938	1.21687
Q7N2E1	lsrK	27.4384	27.3501	27.2839	26.5866	27.336	27.3006	1.21677
Q7N5Y4	plu1795	32.6732	32.7011	32.5475	32.2107	32.5211	32.3445	1.21574
Q7N1X9	acpS	26.2239	-	-	25.9427	-	-	1.21522
Q7N184	plu3611	31.8849	32.181	32.048	31.8504	31.9466	31.4791	1.21358
Q7N5I7	plu1961	28.9343	29.3029	29.2512	28.9855	28.5027	29.1639	1.21314
Q7MYY6	nusA	32.2475	32.3599	32.1885	32.0956	31.9358	31.9286	1.21301		+
Q7N6N8	ybhS	-	-	25.079	-	-	24.801	1.21251
Q7N147	murG	25.0641	25.1423	25.2669	24.8967	24.9647	24.7852	1.21048		+
Q7N6X8	pgm	29.0319	28.6728	28.8777	28.7474	28.746	28.266	1.20942
Q7N4T9	bioD	28.0241	28.2764	27.3624	27.6074	27.7124	27.5227	1.2087
Q7N272	plu3219	31.8146	32.0775	31.1131	31.5349	31.6766	30.9735	1.20862
Q7N2J0	nuoE	29.4098	29.8677	29.4481	29.3005	29.4157	29.1893	1.20861
Q7MB24	plu2646	26.4935	26.5017	26.5664	26.2153	-	26.2814	1.20762		+
Q7NA90	atpF	29.6381	30.1138	29.6881	29.4983	29.7185	29.4079	1.20732
Q7N9E1	plu0399	26.9913	26.7096	26.4168	-	26.7274	26.1445	1.20575
Q7N4B5	cysB	30.7514	31.0911	30.8899	30.7358	30.6549	30.5344	1.20507
Q7N001	ftsE	25.8582	26.2748	26.4493	25.7279	-	26.1221	1.20506
Q7N6I6	hisI	26.4256	-	26.6417	26.2928	-	26.2392	1.20383
Q7MB54	ybhG	29.091	29.1963	29.0886	29.1725	28.565	28.8379	1.20317
Q7MZ85	tatB	25.4155	25.377	-	24.8092	25.3612	25.2181	1.2031
Q7N7E0	plu1210	26.2829	26.2133	26.1644	26.0329	-	25.8742	1.203		+
Q7N244	plu3254	26.6787	27.07	27.1102	26.2017	27.5828	26.2762	1.2025
Q7N1F5	plu3521	25.4739	25.4564	-	25.1283	-	25.2704	1.20236
Q7MYG2	rplX	32.0436	31.899	31.912	31.8606	31.5599	31.6388	1.20172
Q7N192	plu3603	26.4056	26.5278	26.3042	26.3301	-	25.965	1.20161
Q7N8M2	metN	24.9849	25.3008	-	25.006	24.7445	24.8852	1.20104
Q7N4A1	btuR	-	-	26.4061	-	-	26.1429	1.20012
Q7MBG9	sthA	28.8563	27.7234	27.7507	27.9086	27.8644	27.7691	1.19977
Q7N0P0	dnaX	25.5273	25.4404	25.2241	25.185	25.2779	24.9428	1.19917
Q7N0N5	plu3846	25.6425	25.2351	-	25.2078	25.1301	25.1965	1.19803
Q7N7B2	proB	25.3606	25.481	25.4053	24.974	25.1094	25.3834	1.1975
Q7MYH3	rpsK	29.8942	30.4607	30.8628	30.1688	30.5092	29.7618	1.19693
Q7NAD2	d-	26.7257	27.7546	27.2017	27.2035	-	26.7341	1.19626
Q7N8M4	metQ	30.2652	30.6667	30.5658	30.1136	30.2519	30.3567	1.19624
Q7N8P5	pyrH	27.7963	27.0534	27.5173	27.0251	27.3393	27.2272	1.1962
Q7MZ81	ubiE	27.4922	27.6257	27.4525	27.2533	27.4594	27.0828	1.19605
Q7N075	degQ	30.4628	30.7153	30.6285	30.3104	30.507	30.2178	1.19508
Q7N092	rsmI	26.9239	26.8526	26.8143	26.9977	26.3645	26.4583	1.19479
Q7MB99	glyS	30.1988	30.2678	30.0831	29.9505	29.9811	29.849	1.19448		+
Q7MZK4	plu4281	23.8994	-	-	23.6434	-	-	1.19415
Q7N6B5	plu1641	26.3136	26.1389	26.1729	26.0758	26.1766	25.6074	1.19347
Q7N4F5	rnb	28.6454	29.367	29.0571	28.8137	28.8869	28.6037	1.19339
Q7MYU4	nsrR	25.6089	25.7198	-	-	25.4093	-	1.19335
Q7N0J7	dxs	28.9299	27.9027	28.1643	28.0602	28.1875	27.9884	1.19218
Q7N3W5	pdxH	27.4966	27.789	27.7836	27.47	27.0843	27.7548	1.19202
Q7MZ77	udp	27.7189	27.7293	28.0706	-	27.8945	27.2811	1.19071
Q7MYG7	rplR	31.6926	31.8418	31.1179	31.8374	31.1301	30.9297	1.1906
Q7N5J2	fliZ	26.8431	28.1141	26.9585	26.3692	27.4649	27.327	1.19048
Q7N7F6	plu1194	-	-	25.3458	-	-	25.0967	1.18851
Q7N4G7	plu2371	26.5054	26.0585	26.2277	26.2615	-	25.7702	1.18757
Q7N793	pheA	28.7725	28.9232	29.0072	28.6699	28.5005	28.7895	1.18729
Q7N580	plu2076	30.6043	30.0156	30.4648	29.7463	30.2055	30.3911	1.18696
Q7MYU5	rnr	29.0935	28.9162	29.1923	28.8687	28.7723	28.8267	1.18491		+
Q7MYH2	rpsM	32.1233	31.9116	32.0442	31.8492	31.819	31.6766	1.18491		+
Q7N9R9	plu0245	25.7994	25.6197	25.811	25.3423	25.7224	25.4315	1.18478
Q7N0G3	plu3926	26.5339	26.8793	26.6613	26.573	26.4264	26.3495	1.18254
Q7N617	pyrD	27.7853	27.2095	27.1261	27.0403	27.1203	27.2366	1.18198
Q7N0R6	plu3815	-	-	25.3516	-	-	25.1105	1.18192
Q7N010	livF	27.8547	28.767	27.7162	27.8964	-	27.8493	1.1808
Q7N1C8	lysS	30.4512	30.564	30.545	30.4966	29.9769	30.3709	1.17986
Q7N0L2	tig	32.8602	32.9564	32.8319	32.4113	32.9323	32.5916	1.1792
Q7N9V7	bioH	24.4945	24.401	24.4863	24.3564	24.198	24.116	1.17867		+
Q7N0N2	acrR	-	-	24.4939	-	-	24.2583	1.1774
Q7MY37	coaD	26.4094	25.8822	26.3219	24.902	26.7099	26.2954	1.17721
Q7N103	abgB	29.2725	28.9862	28.1612	28.9411	28.6329	28.1416	1.17671
Q7N131	fadD	25.5969	-	25.3233	-	-	25.2254	1.1766
Q7NA46	hslO	28.2191	27.697	-	27.9391	27.9455	27.2862	1.17645
Q7N8N4	lpxB	25.9593	-	25.6228	25.6757	25.8226	25.1739	1.1758
Q7NA97	glmS	30.5458	30.7307	30.6346	30.3688	30.4484	30.3968	1.17477		+
Q7N226	iscA	25.8371	-	-	25.6071	-	-	1.17287
Q7N836	pyrG	31.526	31.3027	31.1759	31.243	31.3032	30.771	1.17211
Q7N867	pcnB	25.3872	25.1784	25.515	25.2001	25.0304	25.1641	1.17172
Q7N9P3	rpoZ	29.9466	29.6373	29.8308	29.6586	29.4907	29.5797	1.17166
Q7N9N9	plu0278	26.3925	26.5587	26.6013	26.0559	26.2898	26.5218	1.17149
Q7N6T5	pal	33.2498	33.4315	32.4665	33.277	33.0374	32.1498	1.1711
Q7N4T7	plu2230	25.8721	25.4701	25.689	25.6019	-	25.2965	1.17107
Q7N476	ompW	30.5784	29.9366	31.4985	30.273	30.435	30.6236	1.17066
Q7MYK8	ilvY	-	-	24.7808	-	-	24.5536	1.17052
Q7N8Z0	mog	26.0042	26.3383	26.1693	25.9655	26.1111	25.7546	1.17029
Q7MY45	rfaF	25.7871	25.5125	25.96	25.639	25.2447	25.696	1.1701
Q7N6U8	plu1440	25.6099	-	25.6452	25.2978	25.2581	25.6479	1.16981
Q7N0D2	plu3959	-	-	26.0048	26.209	-	25.3504	1.1688
Q7N3R7	plu2648	24.7604	-	-	-	24.5357	-	1.16857
Q7N0Y4	plu3745	24.9505	24.9382	-	-	24.7199	-	1.16832
Q7N088	plu4005	28.0685	28.1209	28.2902	28.0489	28.0367	27.7246	1.16725
Q7N6F6	clpA	28.5872	28.3807	28.4163	28.4011	28.1192	28.1947	1.16718
Q7N9A4	rpoB	32.6139	32.8427	32.5573	32.4153	32.6174	32.3139	1.16668
Q7N6E0	plu1615	27.3417	26.8987	27.4617	26.9962	27.3158	26.7335	1.16385
Q7N0E7	sohA	25.5873	-	25.9549	-	-	25.5522	1.16378
Q7NA92	atpA	33.1752	33.0193	33.2178	32.9462	32.9023	32.9076	1.16373		+
Q7MZB3	lysC	25.9959	25.7227	26.2188	25.6509	25.7092	25.921	1.16373
Q7N0J0	nusB	28.6255	28.4983	28.5338	-	28.4733	28.1947	1.16358
Q7N055	plu4042	30.6853	30.9621	30.3598	30.8643	30.5602	29.9282	1.16326
Q7N7F2	nqrC	26.9101	27.2574	26.8602	26.7248	26.9458	26.7095	1.16138
Q7MYG8	rpsE	32.9362	32.7659	32.8563	32.7868	32.6132	32.5157	1.16009
Q7N5X8	plu1801	26.3982	25.6876	25.886	25.6115	25.6983	26.021	1.1596
Q7N3K3	guaB	32.4805	32.5207	32.1512	32.3622	31.9934	32.1594	1.15868
Q7N6G2	artP	-	-	24.5265	-	-	24.3147	1.1581
Q7N8Q8	plu0661	30.6607	30.8468	31.08	30.7385	30.5152	30.6988	1.15803
Q7MYC5	priA	-	24.0654	24.1494	-	24.1708	23.6213	1.15776
Q7N709	rlmN	25.3094	-	24.9538	-	-	24.9205	1.15754
Q7N231	pepB	32.172	32.392	32.2197	32.1547	32.0099	31.9862	1.15746
Q7N8P6	tsf	31.7374	32.0266	32.141	31.5407	31.8252	31.9095	1.15658
Q7MYG6	rplF	32.747	32.5142	32.531	32.4113	32.4675	32.2842	1.15647
Q7N6D3	rpsA	32.9846	32.9605	32.9815	32.7807	32.7024	32.8155	1.15618		+
Q7N9B3	rpsG	33.013	32.9264	32.5397	32.7758	32.8034	32.2725	1.156
Q7MZE3	ssb	29.4241	29.5758	29.6366	29.2972	29.3492	29.3659	1.15515		+
Q7N5E1	plu2011	-	-	25.2867	-	-	25.0798	1.15425
Q7N764	dacA	28.8307	28.8954	28.903	28.6596	28.5943	28.7548	1.15415		+
Q7N042	plu4061	27.4289	27.1446	27.0335	27.1013	-	26.8916	1.1534
Q7N1X5	rnc	26.648	27.6499	26.1897	26.2701	26.9943	26.6056	1.15337
Q7N2T0	cbiT	-	28.2155	-	28.3367	27.5579	28.1345	1.15334
Q7N173	aceF	31.1054	31.424	31.2126	30.8415	31.2738	31.0103	1.15303
Q7N1Z9	plu3312	24.5394	24.8005	24.755	-	24.4452	24.5414	1.15268
Q7MB33	nth	25.2492	25.0574	-	24.9485	-	-	1.15253
Q7N1U7	grpE	31.1473	30.8221	30.9272	30.9148	30.7689	30.6013	1.15178
Q7MYI1	fmt	27.2171	27.6957	27.5569	27.1034	27.3061	27.4486	1.15178
Q7N4R1	plu2261	26.5657	26.9924	26.6127	26.4749	26.6686	26.4192	1.15085
Q7N379	rluC	26.6418	26.1139	27.0566	26.4822	-	26.3223	1.15019
Q7MAY0	fklB	30.3813	30.5996	30.3186	30.2455	30.3675	30.0823	1.14983
Q7N545	znuC	25.2735	-	24.4566	24.9229	24.4643	24.6036	1.14982
Q7N9F9	plu0377	25.3987	-	-	24.775	-	25.6203	1.14951
Q7N1C6	recJ	-	-	25.0551	-	-	24.8542	1.14943
Q7MYM9	hemY	29.4806	29.8079	29.4514	29.8079	29.5205	28.8107	1.14889
Q7N4A0	plu2452	26.358	26.8926	26.7005	26.7312	-	26.1698	1.14861
Q7N404	sppA	28.8937	28.8595	28.7381	28.9696	28.5749	28.3475	1.14852
Q7N8Q9	xni	25.2199	25.2663	-	25.2182	24.8714	-	1.14739
Q7MYY3	glmM	29.7278	29.1445	29.351	29.2608	29.0074	29.3617	1.14693
Q7N7A1	ffh	28.6415	28.6749	28.7511	28.5033	28.4352	28.5366	1.14668		+
Q7N7R6	plu1042	-	25.1794	-	-	24.9824	-	1.14631
Q7MYZ2	deaD	28.679	28.8439	28.9153	28.5669	28.5871	28.6941	1.14608
Q7N9A3	rpoC	32.7531	32.8538	32.7884	32.5676	32.7095	32.5301	1.14553		+
Q7N6Q1	uvrB	25.9772	25.9403	26.2364	26.197	25.6971	25.6722	1.14539
Q7MZ54	fecB	29.5468	-	28.814	-	-	28.985	1.14501
Q7MY24	plu4871	28.2701	28.3632	28.3942	28.1431	28.1811	28.1201	1.14426		+
Q7MZX9	efp	30.2417	30.1347	29.6883	30.2609	29.7481	29.4744	1.14375
Q7N128	leuB	31.1093	31.5434	30.6252	31.3653	30.8963	30.4356	1.14358
Q7N8M7	proS	30.2711	30.3805	30.2265	29.8986	30.1053	30.2938	1.1435
Q7N032	mreB	29.052	29.3556	29.0332	28.9417	29.0692	28.8499	1.14343
Q7N6E2	pflB	30.9033	31.0719	31.0083	30.9689	30.2441	31.1914	1.14316
Q7MZ49	plu4452	28.0085	28.2302	27.8048	28.4145	27.2546	27.7966	1.14281
Q7N3B3	purB	30.1926	30.2732	30.4159	30.2563	29.8424	30.2065	1.14247
Q7N1X3	lepA	29.1265	29.1318	29.259	29.0815	29.2284	28.6316	1.14228
Q7N3N2	proQ	29.685	29.5011	29.3602	29.4062	29.1877	29.3778	1.14196
Q7N7B0	aroL	26.1697	26.1025	26.1092	25.8363	26.2262	25.7468	1.14133
Q7N602	ompA	33.1502	33.0995	32.8097	32.9052	32.8898	32.6929	1.14116
Q7NAD3	dnaA	27.7408	27.3822	27.404	27.3971	27.1227	27.4366	1.14095
Q7N0C8	ribB	26.0506	-	-	25.861	-	-	1.14042
Q7N393	plu2826	-	26.0156	-	25.827	-	-	1.13963
Q7N3T4	plu2629	26.5498	26.5645	26.1193	26.2316	26.4386	25.9977	1.13959
Q7N5H5	plu1974	-	25.6593	25.4862	-	-	25.3843	1.13957
Q7NAD0	gyrB	30.0906	30.0883	30.4865	30.0539	29.7467	30.3028	1.13867
Q7MYS8	orn	26.6846	27.2632	27.1811	26.7669	26.8778	26.923	1.13845
Q7N6J6	metG	30.8815	31.0585	31.0191	30.6322	30.9136	30.8521	1.13843
Q7N6J5	mrp	28.6054	28.3513	28.5666	28.3345	28.1319	28.4983	1.13775
Q7N288	fadJ	27.2391	27.2341	27.1426	27.055	27.0101	26.9922	1.13774		+
Q7N372	sbcB	26.5122	26.8826	26.798	26.418	26.599	26.6231	1.13621
Q7N201	nadE	27.9616	27.9272	27.9243	27.9736	-	27.5336	1.1361
Q7MYE0	oxyR	25.9018	26.0116	25.724	25.259	26.0154	25.8145	1.13511
Q7N2F0	plu3130	32.0301	32.1327	32.0784	31.729	32.0468	31.922	1.13378
Q7N608	plu1768	26.2426	-	25.4299	25.8846	25.5127	25.5711	1.13296
Q7N0G5	plu3924	-	-	23.449	-	-	23.269	1.13287
Q7N6V9	sdhA	30.3699	30.822	30.4934	30.5104	30.3116	30.3248	1.13252
Q7N7X6	hpaB	33.6594	33.9041	33.5268	33.413	33.605	33.5368	1.13171
Q7N2B2	pdxB	25.0847	24.9795	-	24.8536	-	-	1.1317
Q7N0P7	fepE	27.2337	27.4798	27.3968	26.8638	27.1734	27.5391	1.13129
Q7N9F4	plu0382	26.7248	26.8903	26.8544	26.6482	-	26.6442	1.13053
Q7N5J4	fliC	31.4709	31.9044	32.0825	31.7565	32.0369	31.1385	1.1292
Q7MZX4	aspA	32.3328	32.2699	32.1259	32.1394	32.1257	31.9399	1.12858
Q7M7F6	plu0545	24.9297	25.0948	25.3185	-	24.7654	25.1164	1.12774
Q7N0Q9	plu3822	-	26.7953	26.1509	26.2678	26.6393	25.992	1.12771
Q7N0L7	ppiD	30.3465	30.6681	30.5598	30.3875	30.3805	30.2867	1.12756
Q7N755	leuS	29.2465	29.1804	29.2802	29.0453	29.1061	29.0363	1.12749		+
Q7N190	serA	29.4079	29.028	29.0374	29.1423	28.8897	28.9278	1.12595
Q7N0B4	rpoD	29.973	30.4641	30.2652	29.9422	30.1111	30.1366	1.12565
Q7N465	oppF	27.9303	27.7038	27.8704	27.652	27.47	27.8724	1.12508
Q7N1I3	hicB1	29.193	28.7393	28.8159	28.9635	28.8095	28.4654	1.12501
Q7N0E8	metC	25.6256	26.2598	26.3244	25.945	26.0706	25.6885	1.12396
Q7MYN9	uvrD	28.1149	28.3744	28.7315	28.1702	28.0941	28.4514	1.1238
Q7MYT0	plu4593	25.0179	24.9682	25.1013	24.8622	-	-	1.12269
Q7N0I9	ribH	29.341	29.1708	29.2403	29.1881	29.0396	29.0243	1.12248
Q7N3X0	fabI	33.7503	33.5971	33.4763	33.6346	33.4287	33.2625	1.12192
Q7N907	radA	25.5054	25.466	25.1898	25.458	25.213	24.9933	1.12165
Q7N6V7	sucA	31.5868	31.6439	31.2688	31.3691	31.299	31.3346	1.12162
Q7MZ99	aceA	28.8666	29.1675	29.0956	28.8768	28.6696	29.0884	1.12112
Q7MZN3	prfC	26.3895	26.6153	26.6338	26.1458	26.4766	26.5219	1.12098
Q7N299	aroC	27.043	27.1877	26.9517	27.1807	26.7115	26.7966	1.12081
Q7N799	rimM	25.9163	25.6522	25.7253	25.5328	25.8057	25.4676	1.11929
Q7NAD1	recF	-	-	23.4862	-	-	23.3246	1.11852
Q7N125	sgrR	24.7959	25.4242	24.4618	-	25.0672	24.3991	1.11788
Q7N222	trmJ	-	-	26.8481	-	-	26.6877	1.11759
Q7MAX1	mnmE	26.1886	25.8529	26.3231	25.6628	-	26.26	1.11741
Q7N3I3	plu2733	27.5889	28.3198	28.4976	28.0614	27.8304	28.0347	1.11723
Q7N7H0	proC	25.8132	26.3499	-	-	25.9219	-	1.117
Q7N382	rpmF	31.1259	31.2651	31.0706	30.9832	31.0279	30.974	1.11638
Q7N8N9	bamA	30.7777	31.0083	30.9555	30.6822	30.8927	30.6913	1.11608
Q7N172	aceE	32.848	33.0309	32.7124	32.6947	32.809	32.6133	1.1158
Q7N4M1	plu2305	-	-	26.2443	26.3725	-	25.8006	1.11557
Q7N7A4	gshA	27.745	27.399	27.0217	27.7721	26.9101	27.0152	1.11427
Q7MY79	wblM	-	-	24.011	-	-	23.8549	1.11422
Q7N581	plu2075	30.3278	30.0751	29.4827	29.9014	30.0445	29.4717	1.11419
Q7N3Z8	mipA	29.9382	30.1827	30.1965	29.7232	30.3376	29.7932	1.11303
Q7N406	selD	29.4109	29.5242	29.3257	29.6215	29.1995	28.9769	1.11284
Q7N4K5	plu2326	-	-	26.7457	-	-	26.5919	1.11251
Q7MZ50	plu4451	27.1794	25.9208	26.7212	26.5402	26.0036	26.8197	1.11157
Q7N6B3	plu1643	27.41	28.0877	28.2665	27.6883	27.5735	28.0448	1.11151
Q7N2W2	plu2962	26.8561	-	-	27.1056	26.8343	26.1719	1.11129
Q7N3A8	cobB	28.7289	28.0207	28.2375	28.3871	28.3591	27.7845	1.11122
Q7N4M0	plu2306	-	-	25.4193	25.072	25.5269	25.2087	1.10963
Q7MZ87	hemB	28.4578	28.6337	28.5362	28.3051	28.573	28.3012	1.10914
Q7MY85	wblG	26.739	27.0255	26.9822	26.6013	26.6196	27.0781	1.10899
Q7N4Y2	fnr	28.6733	28.4089	28.7429	28.5062	28.7291	28.1468	1.10778
Q7N1Z4	purL	30.23	30.255	30.2946	30.1077	30.1545	30.0748	1.10765		+
Q7MYU0	hfq	-	-	27.9305	27.5573	28.1319	27.6598	1.10763
Q7N221	suhB	27.855	27.5993	28.2234	27.7999	27.6737	27.7615	1.10763
Q7MZX5	fxsA	25.7987	-	25.9566	-	25.9199	25.5415	1.10724
Q7N8X5	nhaR	27.6664	27.6207	27.8442	27.6015	27.6284	27.4625	1.10673
Q7N127	leuC	30.5538	30.7368	30.1548	30.4351	29.8922	30.6795	1.10667
Q7N395	lpoB	27.0967	26.6874	27.0288	27.0079	26.644	26.7229	1.10652
Q7N057	yhbG	27.3055	27.1151	26.8527	26.9924	26.8701	26.9728	1.10652
Q7N4T4	plu2233	-	25.4088	-	25.1903	25.3376	-	1.10561
Q7N524	minE	25.8399	26.8905	26.2017	25.6041	26.4614	26.4336	1.1052
Q7N063	plu4033	-	-	25.6062	-	-	25.462	1.10516
Q7N1F7	plu3519	25.4058	25.8491	25.9784	25.7313	25.5317	25.5396	1.10464
Q7N4Z1	plu2169	26.8297	-	26.7693	-	-	26.6569	1.10386
Q7N4H6	plu2361	31.7178	31.8335	31.887	31.7123	31.6634	31.6353	1.10376
Q7MZY4	frdA	30.6165	30.9195	30.327	30.7046	30.3637	30.3685	1.10349
Q7MYY1	ftsH	31.193	31.3464	31.2738	31.0598	31.2827	31.0449	1.10341
Q7N0G0	rdgC	29.7457	29.8292	29.6122	29.7569	29.5884	29.4161	1.10333
Q7N0P1	plu3840	27.6501	27.7681	28.1129	27.7698	27.4895	27.8551	1.10104
Q7N3H2	nlpB	28.8648	29.0672	29.025	29.024	28.6115	28.9059	1.10078
Q7N6K7	folE	28.6	28.5296	28.773	28.6802	28.2658	28.5425	1.1004
Q7N900	gpmB	27.2229	26.8545	27.6599	27.4744	26.7811	27.0678	1.10037
Q7MYF7	rpsC	32.4202	32.4657	32.6691	32.2939	32.5779	32.2728	1.09945
Q7N6I3	hisH	-	25.2715	25.1071	25.0494	-	25.057	1.09889
Q7N6K4	maeA	27.8322	27.7185	27.36	27.3979	27.5661	27.539	1.09879
Q7N590	prs	30.9413	31.0117	30.9681	30.8436	30.9429	30.7293	1.09818
Q7N293	hutC	25.8128	25.4039	-	25.4734	-	-	1.09809
Q7N383	plsX	25.7517	25.9081	25.7631	25.6809	25.9919	25.3455	1.09802
Q7N826	plu0922	30.4893	30.1781	30.1181	30.5982	29.9699	29.8151	1.09739
Q7N7U1	plu1011	26.1861	26.6455	26.4524	26.203	26.6554	26.0242	1.09716
Q7N8V4	lptD	26.8716	26.5148	27.2172	26.7901	26.5395	26.8769	1.0961
Q7N5Y0	plu1799	-	-	26.1271	25.2796	-	26.7124	1.09515
Q7N6F8	cspD	27.4926	-	27.7382	27.7342	-	27.2346	1.09502
Q7MY39	kdtA	-	-	26.0587	25.7961	-	26.0598	1.09487
Q7N3N3	prc	28.161	27.5926	27.9654	28.0148	27.4178	27.8951	1.0946
Q7N5D1	plu2023	26.5975	26.7884	26.4822	26.6551	26.4719	26.3501	1.09455
Q7N0K6	cyoB	30.4422	30.6988	30.5136	30.8527	30.2027	30.21	1.0941
Q7N7H2	plu1177	27.2327	26.2071	-	27.141	25.771	26.8637	1.09277
Q7N2D6	lsrF	30.7392	30.9064	30.7026	30.693	30.6777	30.5951	1.09237
Q7N3L9	sdaA	-	-	26.3119	26.3938	-	25.9767	1.09174
Q7N153	lpxC	25.9446	-	-	25.8181	-	-	1.09163
Q7N2N5	paaK	29.4636	29.5477	29.376	29.332	29.2766	29.4002	1.09141
Q7N6W2	gltA	32.618	32.5965	32.2654	32.4049	32.593	32.1053	1.09093
Q7N002	ftsX	26.3275	26.2754	25.9579	26.1802	-	25.9434	1.09061
Q7MB25	plu2645	25.9267	26.452	-	25.998	26.0501	26.1462	1.0902
Q7N9V1	plu0210	29.4813	29.5574	29.7282	29.5834	29.3157	29.4949	1.09
Q7N4W1	hcaR	26.066	25.6921	-	-	25.7549	-	1.08985
Q7N122	speB	26.9029	-	26.6471	26.8318	26.4739	-	1.08831
Q7MY03	fdhE	26.0528	26.232	-	26.0208	-	-	1.08796
Q7N527	plu2133	27.1556	26.9402	27.0568	26.8286	27.0948	26.8666	1.08742
Q7N9H3	plu0363	-	25.11	24.0714	-	-	24.4698	1.08739
Q7N8K0	mutS	28.1462	27.6133	28.1585	27.8188	27.6833	28.0584	1.08611
Q7NA09	plu0139	27.6699	27.5734	28.0533	27.7203	-	27.5728	1.08596
Q7N4B8	ribA	-	25.0201	24.9931	-	-	24.8877	1.0859
Q7N1U3	plu3376	25.222	-	25.1546	24.988	25.1457	25.0753	1.08575
Q7MYA2	plu4784	24.095	24.3949	-	-	24.1269	-	1.08526
Q7N7Z6	epd	26.5738	27.045	-	26.5934	26.869	26.6129	1.08495
Q7MY53	secB	30.5223	30.0858	30.6405	29.9364	30.4836	30.4834	1.08305
Q7N0C7	plu3964	28.8566	28.6364	28.3017	29.0773	28.4443	27.9299	1.08251
Q7N4B0	sohB	29.2365	29.3777	29.3786	29.3043	29.0721	29.2734	1.08246
Q7N8R8	plu0650	25.4813	-	26.1602	25.707	-	-	1.08205
Q7N904	yjjK	32.2326	32.4387	32.0462	32.0827	32.351	31.9438	1.0817
Q7N421	plu2534	-	-	27.0326	-	26.8932	26.9484	1.08055
Q7MZZ6	zntA	27.7651	27.3996	27.4147	27.681	27.5544	27.0119	1.07975
Q7NA59	rpe	29.429	29.3158	29.6956	29.6079	28.8457	29.6549	1.07967
Q7N8P3	dxr	25.702	25.1328	25.2827	25.3979	25.3964	24.9918	1.07959
Q7N2K9	plu3067	27.05	27.1011	27.0183	27.0345	27.0517	26.7519	1.07953
Q7N8K2	nlpD	-	-	27.1178	26.9332	-	27.0818	1.07949
Q7N0E9	exbB	28.9251	29.0249	28.9938	28.8141	28.9347	28.8664	1.07888
Q7N6C6	msbA	26.5083	26.1807	26.3814	26.1112	26.1367	26.4942	1.0788
Q7N3T7	plu2626	26.6047	26.5893	26.651	26.9214	26.1261	26.4715	1.07825
Q7MZ25	valS	29.6519	29.694	29.687	29.6006	29.5247	29.5835	1.07774		+
Q7N6Q4	bioD	24.1184	-	-	-	-	24.0119	1.07662
Q7N0N3	plu3849	-	-	23.1527	-	-	23.0474	1.07571
Q7N9A9	nusG	30.203	30.201	30.0512	30.1624	30.1597	29.8192	1.07524
Q7MZ21	plu4487	25.8227	-	26.0891	25.7841	25.994	25.7809	1.07391
Q7N0J4	plu3890	24.5517	24.3187	-	-	24.3326	-	1.07374
Q7N3U3	sufC	25.6708	-	25.3093	25.2431	25.5321	-	1.07356
Q7N3T5	ppsA	31.8799	32.1643	31.9754	31.9595	31.9768	31.7786	1.07294
Q7N4J6	plu2341	27.3629	27.7428	27.2399	27.325	27.2945	27.4215	1.07293
Q7N0T4	plu3795	35.5521	35.7445	34.5687	35.1496	35.6383	34.773	1.07284
Q7N361	plu2860	26.0966	25.8236	25.9379	-	-	25.8515	1.07263
Q7MZD8	hicB2	-	-	25.6588	25.5847	25.531	-	1.07245
Q7N3Q0	pheS	30.6788	30.4544	29.9635	30.5392	30.2112	30.051	1.07063
Q7NA55	aroK	30.0921	29.9597	30.026	29.6652	29.93	30.188	1.07044
Q7N197	gcvT	30.7914	30.6879	30.5154	30.4974	30.5592	30.6462	1.06975
Q7N702	der	29.7652	29.1474	29.7605	29.2658	29.6848	29.4329	1.0692
Q7N2C1	plu3165	28.4779	28.0566	28.2952	27.9064	28.2545	28.3798	1.06905
Q7N7X9	plu0972	27.4704	27.653	27.05	27.0656	27.8051	27.0146	1.06884
Q7MYG1	rplN	31.1456	31.0282	31.2766	31.111	31.1709	30.8891	1.0667
Q7NA10	plu0137	23.9251	-	-	23.8324	-	-	1.06641
Q7MZH2	plu4316	25.3623	-	25.6257	-	-	25.4013	1.06633
Q7N180	plu3615	-	-	28.354	-	28.3493	28.1735	1.06628
Q7N2M6	gyrA	30.7682	30.4633	30.5957	30.7765	30.2893	30.4843	1.06611
Q7N0L4	clpX	29.3809	29.5636	29.6641	29.4886	29.309	29.5345	1.06595
Q7N8P7	rpsB	32.3505	31.9723	32.5101	32.2287	32.1875	32.1421	1.0655
Q7N030	aroQ	-	-	24.4092	-	-	24.3194	1.06424
Q7N156	secA	29.727	29.9311	29.764	29.6411	29.8906	29.621	1.06424
Q7N7U4	plu1007	28.5657	28.5447	27.9283	28.4021	28.7857	27.5815	1.06423
Q7N036	cafA	26.1852	26.0665	26.2996	26.042	25.9266	26.3142	1.06402
Q7N7D0	plu1220	25.4221	26.3038	-	25.5898	25.731	26.0012	1.0636
Q7MZ27	pepA	31.489	31.3165	31.2204	31.4289	31.2935	31.039	1.06305
Q7N0B5	dnaG	-	-	24.6504	-	-	24.5629	1.0625
Q7N229	fdx	27.5445	27.6146	27.2507	27.4151	-	27.3504	1.06228
Q7N9M9	avtA	24.5105	24.7576	24.7094	24.4169	-	24.7279	1.062
Q7N0M7	tesB	27.0966	27.3644	27.1046	27.3784	27.1307	26.7969	1.0618
Q7N7F3	nqrB	-	-	25.9706	-	-	25.8887	1.05841
Q7N3D5	thiD	24.8879	24.7628	-	24.4834	25.0068	-	1.0572
Q7N7T9	plu1013	28.0752	28.0723	27.8626	28.0928	28.1257	27.5525	1.05681
Q7N1F9	plu3517	33.2064	33.1981	32.9665	33.183	33.0906	32.8587	1.05671
Q7N5J3	fliA	25.0779	-	-	25.5028	-	24.4939	1.05671
Q7MYG9	rpmD	30.1122	29.5004	28.6907	29.611	-	29.0989	1.05663
Q7N3S6	plu2637	-	-	24.2304	-	-	24.1517	1.05607
Q7N039	tldD	29.3329	29.8024	29.6849	29.4219	29.541	29.623	1.0556
Q7N960	hemE	26.992	27.4109	27.2913	27.2496	27.2916	26.9191	1.05555
Q7N834	plu0914	28.6642	28.2475	28.9539	28.6689	28.5322	28.4328	1.05501
Q7N2A8	plu3180	26.7187	26.6269	26.957	26.8761	26.6447	26.5521	1.05452
Q7N4W2	plu2202	33.0271	32.5263	33.2067	33.1142	32.5662	32.8504	1.05441
Q7N064	plu4032	28.6102	28.2882	28.747	28.4264	28.6302	28.3595	1.05441
Q7N9P2	gmk	-	-	25.5413	-	-	25.4658	1.05375
Q7N2M3	nrdB	28.6884	28.8805	28.4321	28.4686	28.8214	28.4857	1.05343
Q7N8X0	fkpB	23.8731	23.4348	23.2869	-	23.4568	-	1.05324
Q7N6D7	plu1618	-	26.2315	25.7929	26.0219	25.9392	25.8548	1.05231
Q7N9E6	pabA	-	-	24.1615	-	24.0018	24.1747	1.05212
Q7N0D6	tolC	31.4377	31.596	31.6976	31.3613	31.5931	31.5582	1.05181
Q7N8V6	pdxA	24.8898	24.9131	25.181	24.8584	24.9745	24.9389	1.05023
Q7MYC8	metB	24.4241	24.7028	-	24.3251	-	24.661	1.05002
Q7MYL4	rho	30.6969	30.7963	30.6044	30.748	30.6043	30.5352	1.04977
Q7MZ91	fadA	28.7758	29.2601	28.6569	28.8623	28.9606	28.6622	1.04913
Q7N508	plu2152	27.5706	27.7165	27.0871	27.7248	-	27.0536	1.04891
Q7MYT9	mutL	25.7559	25.7335	25.6137	25.7181	25.6261	25.5554	1.04813
Q7N3M3	yebF	27.5639	27.4355	28.2263	27.3908	-	27.9613	1.04669
Q7N174	lpdA	32.4063	32.66	32.1426	32.4998	32.3133	32.2002	1.04622
Q7N9R1	plu0253	28.1526	28.1388	28.3354	28.2993	27.9344	28.1976	1.04622
Q7N881	plu0860	25.1786	24.889	-	24.8905	25.047	-	1.04611
Q7N369	plu2850	29.4321	29.42	29.3134	29.155	29.2023	29.6135	1.04599
Q7N0G2	cpdB	29.462	29.5237	29.5031	29.5491	29.3011	29.4454	1.04567
Q7N933	plu0519	-	-	26.044	25.8218	-	26.1392	1.04498
Q7MYU3	hflC	30.9732	30.8533	30.5745	30.8137	30.892	30.5053	1.04488
Q7MYE3	btuB	-	-	25.397	-	25.1803	25.4882	1.04446
Q7N3P9	rplT	31.0314	30.7648	30.2878	31.173	-	30.0909	1.04443
Q7MB92	thiF	26.163	26.2772	27.0043	26.4851	26.5033	26.2703	1.04389
Q7N622	asnS	32.2389	32.1691	32.0194	32.13	32.1847	31.9272	1.04377
Q7MZV9	plu4161	28.2828	27.6292	27.6847	27.8984	27.8507	27.6624	1.04371
Q7NAB1	plu0023	25.3852	25.8759	25.5169	25.7692	-	25.2983	1.04169
Q7N862	mrcB	29.5749	29.8447	29.763	29.4626	29.9527	29.5926	1.04122
Q7N784	plu1274	28.4123	28.2117	28.5958	28.6156	28.1469	28.2835	1.04095
Q7N091	plu4002	26.4926	26.4545	26.4595	26.5105	26.5094	26.2141	1.04069
Q7N2M4	nrdA	30.6375	30.6493	30.5286	30.617	30.5309	30.5034	1.03863
Q7MZP4	plu4237	32.1788	30.7598	31.2712	31.8363	30.7639	31.4464	1.03842
Q7NA38	plu0107	24.9262	-	25.5737	25.1966	-	-	1.03764
Q7NA93	atpG	30.2473	29.5954	30.1862	29.9556	29.8782	30.0381	1.03695
Q7N9Q2	plu0262	26.6636	27.1948	27.0302	26.604	-	27.2174	1.03681
Q7N4G3	plu2375	27.8653	27.9768	28.287	27.869	27.9971	28.1077	1.03655
Q7N4C9	plu2412	31.1714	30.9695	31.228	31.3105	31.0252	30.8804	1.03591
Q7N0R0	plu3821	28.9262	28.3506	29.0642	28.7541	28.3104	29.1249	1.03565
Q7N079	rpsI	31.2972	30.8538	31.2034	30.9116	31.2764	31.0152	1.03554
Q7N9M7	glyQ	28.276	28.1893	27.8091	28.2807	28.1234	27.7194	1.0355
Q7N9A7	rplA	29.6431	30.1047	30.2078	29.8739	29.3421	30.5907	1.03503
Q7N505	plu2155	25.1116	24.8303	-	-	24.9216	-	1.03481
Q7N5X0	plu1809	25.478	-	-	25.4293	-	-	1.03437
Q7N6Y5	zipA	-	26.3811	25.9276	26.021	26.466	25.8378	1.03245
Q7N9E4	plu0396	27.5537	-	27.1772	-	-	27.3197	1.03224
Q7N5A2	ychF	29.6139	29.8255	29.7645	29.6984	29.6484	29.7204	1.03208
Q7MZ45	plu4458	28.8935	28.5534	29.1939	29.0429	28.5886	28.8769	1.03106
Q7N378	rne	29.6609	29.6385	29.6723	29.7303	29.5184	29.5913	1.0309
Q7N0P8	gsk	25.4612	25.7226	25.8191	25.559	25.3432	25.9703	1.03058
Q7MB61	nagB	26.8156	26.011	-	26.5749	26.4973	26.0377	1.03048
Q7MAY1	truB	28.0566	28.1486	28.1311	27.9204	28.1716	28.1147	1.03039
Q7MYB4	plu4771	-	-	24.3261	-	24.3402	24.2277	1.02967
Q8KM02	slyA	31.7959	31.2323	31.2416	31.5083	31.1563	31.4788	1.02965
Q7MYH9	trkA	23.9324	-	-	23.9539	23.8289	-	1.02879
Q7N142	murE	27.3582	27.7521	27.2115	27.6194	27.2681	27.3132	1.02836
Q7N3U9	plu2614	27.1506	27.1524	27.3177	26.858	27.4165	27.2266	1.02802
Q7N592	plu2064	28.0321	27.6854	28.5489	28.1113	28.0659	27.9702	1.02786
Q7N873	yadG	26.4294	26.1403	26.4377	26.2715	26.4479	26.1752	1.02641
Q7NA50	mrcA	24.9901	25.4191	25.2576	24.9742	25.3359	25.2481	1.02539
Q7MYA8	plu4777	26.8748	27.1941	26.8271	-	27.1029	26.7575	1.02467
Q7N827	plu0921	27.8404	27.1822	27.6815	27.4733	27.4623	27.6664	1.02388
Q7MZY3	frdB	28.0178	28.2841	27.7866	28.2762	27.6948	28.0174	1.02342
Q7N3B4	hflD	27.1016	-	27.3643	27.185	27.1665	27.248	1.02321
Q7N5W0	pyrC	26.0733	25.8517	26.0128	26.2134	26.0332	25.5922	1.0231
Q7N3B2	phoP	27.5976	26.9309	27.2608	27.4654	27.1556	27.0702	1.02293
Q7N9X3	eda	26.0824	-	26.1199	-	-	26.0687	1.02279
Q7N5Y3	plu1796	28.6173	28.5647	28.5572	28.7972	28.8542	27.9923	1.02232
Q7N6V4	sucD	31.3932	31.3112	31.3098	31.6998	31.2145	31.005	1.02217
Q7N6V6	sucB	31.1278	31.079	31.1282	31.12	30.9747	31.1468	1.02184
Q7MYF1	rplC	32.8418	32.1686	32.4361	32.5202	32.7049	32.1289	1.02157
Q7N4T8	plu2228	28.7745	28.4512	29.0641	28.8249	28.4331	28.9403	1.02137
Q7N5X2	plu1807	25.2473	25.5159	25.9193	-	25.4883	25.5725	1.0213
Q7MY89	wblD	25.4966	25.9557	26.0234	25.774	25.9006	25.7117	1.02086
Q7N843	erpA	29.0216	29.2384	-	-	29.1006	-	1.02056
P60092	prmA	26.499	26.9751	26.698	26.0316	27.0554	26.9984	1.02023
Q7N995	plu0448	28.7255	28.5047	29.7257	29.1965	28.7037	28.972	1.01952
P0A7U0	rpsR	29.8542	-	30.1848	-	-	29.9923	1.01906
Q7N2V4	eutB	29.1861	29.2655	29.0078	29.1338	29.1185	29.1255	1.01903
Q7N095	plu3998	27.1482	27.1536	27.8439	27.2801	-	27.4334	1.0176
Q7MZK0	feaB	31.8272	31.9215	31.9509	31.9911	31.655	31.9789	1.01738
Q7N9T4	yihI	27.2235	26.8647	26.5576	27.3635	26.9226	26.2855	1.01728
Q7N488	trpD	30.1133	29.919	29.8828	30.4602	29.6907	29.6917	1.0169
Q7N6V8	sdhB	29.3626	28.9156	29.0778	29.3458	29.118	28.821	1.0166
Q7N3Y1	plu2581	25.7235	-	25.8308	25.8758	25.598	25.7875	1.01632
Q7N0R5	ybbP	25.4782	25.2335	25.3248	25.3306	25.4726	25.165	1.0159
Q7N1U1	smpB	27.7283	27.2906	27.568	27.8461	27.4231	27.2499	1.0158
Q7N6S3	nadA	-	-	25.3742	-	-	25.3516	1.01576
Q7N2M5	ubiG	24.7489	-	-	24.5203	24.9378	-	1.01391
Q7N535	plu2125	29.9035	31.7322	31.0539	30.9415	30.6331	31.0591	1.01303
Q7N3V0	pykF	24.4654	24.29	-	24.2593	24.4626	-	1.0117
Q7MZB4	pgi	29.473	29.7673	29.7811	29.9411	29.5948	29.4369	1.01128
Q7NA94	atpD	32.4858	32.6355	32.7598	32.2028	32.8136	32.8169	1.01111
Q7N7A6	recA	31.6252	31.5206	31.7279	31.4803	31.6708	31.6768	1.01061
Q7N6S0	gpmA	31.0151	31.1419	31.1069	30.9279	31.0691	31.2314	1.00824
Q7MYF0	bfr	28.0276	28.1249	28.0325	28.0678	27.9074	28.1748	1.00808
Q7N609	pqiB	26.3633	26.3755	26.3309	26.5263	26.1393	26.3703	1.00784
Q7N2B3	usg	26.7514	27.139	27.1977	27.0217	26.8578	27.1769	1.00733
Q7MYL6	wzzE	25.2608	-	-	25.1454	25.3558	-	1.00711
Q7N803	tktA	32.4931	32.5689	32.3332	32.5006	32.5805	32.2846	1.00684
Q7MZ83	ubiB	24.6703	-	24.749	-	24.6326	24.7697	1.00594
Q7N0Q1	plu3830	-	-	24.7241	-	-	24.7156	1.00592
Q7N4P5	plu2277	25.7233	-	26.1182	25.5131	-	26.3118	1.00575
Q7N2G8	astA	26.9257	27.7496	25.852	27.5524	-	26.1182	1.00496
Q7N1C0	plu3556	28.8066	28.8566	28.6013	29.0435	28.7111	28.4899	1.00462
Q7N486	trpB	31.5993	31.758	31.6642	32.1528	31.1933	31.6567	1.00434
Q7N162	nadC	27.6873	27.7769	27.5266	28.0901	27.5051	27.3786	1.00395
Q7N713	plu1369	29.2179	29.0129	29.2554	29.3753	29.0917	29.008	1.00257
Q7N282	plu3206	26.628	26.8846	26.2413	26.5484	27.0656	26.1297	1.00237
Q7N502	plu2158	25.4783	-	-	25.4766	-	-	1.00114
Q7N9S1	plu0243	27.7651	28.0531	27.6698	27.8479	27.8613	27.7752	1.00084
Q7MZE2	uvrA	27.7778	27.3797	27.745	27.8836	27.285	27.7312	1.00064
Q7N136	ilvH	29.7701	29.7609	29.6972	29.882	29.7452	29.5989	1.00051
Q7N3B8	plu2800	26.7619	26.5919	26.9301	27.0505	26.6359	26.598	0.999884
Q7N767	lipA	27.0353	26.7471	26.685	26.861	26.7936	26.8171	0.998989
Q7N930	deoD	28.4633	29.5794	29.0087	29.19	29.0912	28.7774	0.998359
Q7MYZ0	pnp	32.3188	32.4148	32.5313	32.372	32.5444	32.3556	0.998356
Q7N043	pmbA	30.2086	30.012	29.7103	30.2366	29.9104	29.7919	0.998156
Q7N2N4	plu3042	28.553	28.2426	28.4611	28.3914	28.5768	28.2987	0.997662
Q7MYT8	amiB	25.1007	24.7406	24.7807	25.2595	-	24.4962	0.997341
Q7N3I7	entE	30.1461	30.1961	30.3077	30.1945	30.2113	30.2557	0.997328
Q7N625	aspC	31.412	31.3696	31.3249	31.5676	31.3415	31.2096	0.997171
Q7N152	ftsZ	30.3245	30.1105	30.1299	30.2374	30.3591	29.9825	0.996748
Q7MYB6	glpK	30.5164	30.9889	30.4939	30.7365	30.684	30.5941	0.99645
Q7N6H7	dacC	29.5544	29.7413	29.5752	29.714	29.6914	29.4817	0.996239
Q7N7D1	plu1219	26.5677	26.1225	26.5055	26.4757	26.2753	26.4631	0.995755
Q7N763	rlpA	26.4174	26.0657	26.4541	26.2374	26.4463	26.2734	0.99541
Q7N0C3	hldE	28.2475	28.1368	28.0108	28.1947	28.1711	28.0497	0.995288
Q7N932	deoC	28.9056	29.3113	29.2719	29.2227	29.4253	28.8631	0.994854
Q7N6J0	gnd	31.6203	31.683	31.9076	31.5713	31.8856	31.7767	0.994748
Q7N4F9	rnfC	25.684	25.7503	-	25.87	-	25.5816	0.994022
Q7N6T6	tolB	29.9378	30.0666	30.0018	30.0951	30.1071	29.8321	0.993529
Q7MZX1	plu4140	24.9236	25.6184	25.0428	25.2087	25.1831	25.2222	0.993255
Q7N0Z0	aldB	34.946	35.0258	34.8796	35.0901	34.9925	34.8002	0.992767
Q7N2B6	folC	27.8831	28.016	27.7624	27.8891	27.9055	27.8986	0.992691
Q7N6R8	modF	26.0242	25.3605	25.2649	25.9838	-	25.1383	0.992297
P60103	rplK	31.1933	30.3881	31.1422	31.3614	31.11	30.2859	0.99226
Q7N2H0	astB	25.5124	-	25.6163	25.5756	-	-	0.992246
Q7N3Q7	arnA	27.338	26.4946	27.2093	27.1721	26.8912	27.0143	0.99179
Q7N6G0	macA	26.9247	26.7873	27.1628	27.0344	26.6641	27.2144	0.991224
Q7N2V9	plu2965	24.9897	25.0924	-	25.2796	24.743	25.1388	0.991217
Q7N4S2	plu2248	32.7056	32.3901	32.2291	32.781	32.0559	32.5263	0.991165
Q7N028	accC	31.3981	31.6046	31.2963	31.5531	31.4246	31.3605	0.990979
Q7MZA2	iclR	27.4619	26.2701	27.0744	27.0571	-	26.8401	0.990908
Q7N6D6	serC	31.7322	31.829	31.4163	31.764	31.9751	31.2783	0.990803
Q7N1W8	nadB	32.78	31.1348	30.9873	32.5708	31.228	31.1439	0.990677
Q7N8A2	agaZ	-	-	25.7829	-	-	25.7986	0.989156
Q7N8M8	cutF	27.4147	28.2723	28.4071	27.462	28.1293	28.554	0.988224
Q7N3C7	plu2790	-	25.7143	26.0595	25.9272	25.7511	26.0356	0.987795
Q7N877	plu0864	26.4756	26.0813	25.9448	26.1071	26.2564	26.1915	0.987754
Q7N8Z7	arcA	29.9864	30.2488	29.641	30.0558	30.1354	29.7393	0.987532
Q7N804	plu0945	25.4126	-	-	25.2958	-	25.5656	0.987495
Q7MZ07	plu4504	26.9693	26.9801	26.9965	27.0054	27.1366	26.8584	0.987473
Q7N9B2	fusA	33.1732	33.5152	33.3423	33.2517	33.4667	33.3675	0.987336
Q7N232	plu3275	26.1078	-	26.5462	26.1508	26.2814	26.604	0.987329
Q7N7D9	plu1211	24.9865	25.5862	25.1557	25.1837	-	25.3395	0.987065
Q7N067	plu4029	26.4229	26.4948	26.1704	26.791	-	25.9721	0.986997
Q7N6L6	plu1533	27.5648	26.6291	27.0235	27.5036	27.2008	26.5703	0.986864
Q7N4T1	plu2236	28.3599	27.9887	28.627	28.7143	28.2494	28.073	0.985978
Q7MZB8	lexA	28.0092	27.7736	28.2556	28.0366	28.0628	28.0016	0.985647
Q7MZI6	plu4300	24.6882	-	24.793	24.7617	-	-	0.98545
Q7N7I0	mutY	24.9502	25.4979	24.7144	25.0756	-	25.0764	0.984964
Q7N4Q3	plu2269	24.9121	25.6467	25.2008	-	25.5464	25.0051	0.984489
Q7M7A4	plu0285	-	-	26.2916	-	-	26.3148	0.984054
Q7MZ78	plu4416	26.5602	26.458	26.3824	26.7011	-	26.2802	0.983654
Q7N6U7	plu1441	28.3976	28.3695	28.4071	28.4712	28.4172	28.3578	0.983482
Q7MXZ5	plu4904	25.4655	-	25.4525	-	-	25.4841	0.982763
Q7N6S1	aroG	31.1092	31.4374	31.18	31.4071	31.3402	31.0559	0.982453
Q7N3K4	guaA	31.6738	31.4683	31.7496	31.6414	31.6493	31.6776	0.982453
Q7MZH4	plu4313	28.6931	29.1051	28.6446	28.7707	28.8981	28.8519	0.982196
Q7N8Z6	thrA	28.8967	29.014	28.8946	28.8119	29.0529	29.0194	0.98194
Q7N959	nfi	25.5312	-	25.9365	-	-	25.7605	0.981677
Q7N0P5	adk	31.435	31.9651	31.5868	31.6466	31.7268	31.697	0.980876
Q7N0K1	plu3881	30.4916	30.2616	30.6539	30.2807	30.5948	30.6175	0.98033
Q7N2S2	plu3003	-	-	26.895	27.0892	-	26.7582	0.98031
Q7N038	plu4065	30.9548	30.9732	30.847	31.173	30.8796	30.8118	0.979549
Q7N3J7	maeB	29.7954	29.4812	29.7855	29.8401	29.541	29.7704	0.97954
Q7N6L0	moeA	27.2565	27.5294	26.9563	27.6537	27.0104	27.1681	0.979414
Q7N1C7	prfB	27.4785	27.4456	27.5886	27.6114	27.4515	27.541	0.979156
Q7N0D1	plu3960	25.3323	25.3819	24.2614	25.0089	25.0364	-	0.978888
Q7N8U4	thyA	26.0401	-	25.6551	26.0862	-	25.6711	0.978711
Q7N9E9	engB	28.013	27.9147	27.4595	28.1222	28.041	27.3179	0.978518
Q7N7W3	hpcC	32.0257	32.0887	31.5724	31.9285	31.9543	31.8999	0.978095
Q7MYN0	hemX	29.5449	29.7125	29.7218	29.3966	29.7158	29.9758	0.975132
Q7N6E8	plu1603	28.0524	-	27.7008	27.9914	28.0171	27.7362	0.973806
Q7MYI2	def	28.0254	27.7858	27.869	27.9677	28.0337	27.7962	0.973246
Q7N8W9	ispH	25.9059	25.6595	25.8444	26.0575	25.9548	25.5187	0.972399
Q7MYS5	plu4598	24.642	24.5005	-	24.8522	24.3726	-	0.971893
Q7N550	plu2109	28.7665	-	28.1272	28.706	-	28.2713	0.971415
Q7N3B5	plu2803	-	-	24.8454	-	-	24.888	0.970857
Q7MYW6	fbp	30.6349	30.6158	30.5535	30.6397	30.7121	30.5816	0.970578
Q7N2I1	ackA	30.1174	30.2693	30.1011	30.32	29.9874	30.3101	0.970493
Q7N0C0	plu3971	28.5674	28.4051	28.0645	28.5768	28.7076	27.8823	0.970486
Q7N604	plu1773	25.076	-	25.219	25.2915	-	25.09	0.970473
Q7N135	ilvI	29.6998	29.5598	29.7034	29.7722	29.6572	29.6673	0.969572
Q7N9E3	prkB	28.633	28.481	28.3185	28.9921	28.3292	28.2457	0.969406
Q7MY41	rfaG	25.7163	-	25.3004	25.7338	-	25.3727	0.969354
Q7MZE0	plu4352	-	-	24.7355	-	-	24.7806	0.969189
Q7N4Z2	pntB	29.5819	29.8016	29.6126	29.8854	29.5052	29.7469	0.967869
Q7N6W0	sdhD	27.7475	-	27.8105	27.9566	-	27.6985	0.966914
Q7N2V2	plu2972	25.8974	25.8383	-	26.0367	25.7978	-	0.966345
Q7N707	plu1375	28.8883	28.7372	29.1343	28.9706	28.9346	29.0032	0.966244
Q7N0S2	purE	26.84	26.864	26.8651	26.8658	27.0536	26.8008	0.965675
Q7N6E7	serS	29.7735	30.0576	29.8206	29.8688	29.9665	29.9698	0.965167
Q7N703	bamB	29.9359	29.9387	30.0074	30.0897	30.1391	29.8072	0.965091
Q7N0B7	plsY	-	-	24.192	-	-	24.244	0.964565
Q7N5L7	plu1931	28.246	28.0513	28.0985	28.4559	-	27.9125	0.964425
Q7N386	fabG	32.0352	31.6824	31.7669	31.8391	32.139	31.6646	0.964101
Q7N6N6	plu1510	27.2575	27.2752	27.5239	27.3652	27.3818	27.4682	0.964019
Q7N8N1	accA	31.0869	30.9827	30.829	30.8696	31.1307	31.0594	0.963467
Q7N121	speA	26.5476	26.388	27.0407	26.4661	26.7465	26.9267	0.963026
Q7MZJ9	plu4286	30.7899	31.2272	31.1288	30.7081	31.366	31.2376	0.962412
Q7MY55	cysE	28.8985	28.6575	29.312	28.8043	29.2166	29.0141	0.96217
Q7N5X5	plu1804	28.9689	28.9469	28.9657	29.1617	29.1849	28.7085	0.960701
Q7N542	pykA	32.7583	32.5905	32.5057	32.7752	32.7234	32.5368	0.95906
Q7N4B9	lapA	24.5881	25.336	-	24.5937	25.2296	25.2466	0.958446
Q7MZ92	fadB	29.8103	30.1778	29.9503	29.9695	30.0675	30.0866	0.958101
Q7N3G9	bcp	29.5842	30.1553	29.7215	29.8978	29.83	29.9188	0.95801
Q7MYL8	wecC	27.0216	26.4771	26.7175	26.874	26.8525	26.6764	0.957785
Q7MYY8	rbfA	29.1078	28.6623	29.3474	28.7698	29.4228	29.1147	0.957101
Q7N0K7	cyoA	31.6069	31.6463	31.6492	31.843	31.6433	31.6062	0.957024
Q7N8E1	plu0786	27.9023	27.8916	27.6987	27.8958	-	-	0.955989
Q7MYB1	pfkA	28.7609	28.7899	28.8268	29.1198	28.789	28.6643	0.955855
Q7N388	fabF	29.8571	29.895	29.8461	30.032	30.0795	29.6835	0.955539
Q7MBH1	ispA	26.307	26.5739	26.4469	26.6729	-	26.3454	0.954906
Q7N8Q0	dapD	29.0417	28.7184	29.0299	29.0948	29.06	28.8415	0.953453
Q7N523	minD	29.2802	29.206	29.2132	29.192	29.4073	29.3075	0.953219
Q7N8A0	agaV	-	24.8825	26.3399	25.6133	-	25.7511	0.951991
Q7N934	plu0518	25.1062	-	-	25.4378	-	24.9172	0.95175
Q7N745	nagC	25.4972	25.5921	25.2753	24.7989	26.3235	25.4572	0.951571
Q7N620	pepN	31.6309	31.6075	31.4219	31.7328	31.6512	31.4918	0.951393
Q7N0D8	icc	25.4524	-	25.4848	25.5786	25.3283	25.7153	0.951226
Q7MYZ1	nlpI	24.3679	24.4517	-	24.383	24.5811	-	0.951153
Q7N565	argS	29.808	30.1536	29.7397	29.997	30.0877	29.8382	0.950126
Q7N5E7	plu2005	25.2607	25.0883	25.0894	-	25.2162	25.2243	0.949942
Q7N811	plu0938	26.4926	25.8465	25.8488	26.3284	25.9942	26.0905	0.949333
Q7N7I1	plu1168	30.2051	30.2392	30.197	30.5098	30.0702	30.2886	0.948853
Q7N3P2	yfeB	26.0643	26.11	25.8882	26.1044	26.1794	26.0064	0.948739
Q7N053	rapZ	23.7973	23.7405	-	-	23.8456	-	0.948237
Q7MZA5	plu4388	26.4338	26.7672	26.7419	26.7023	-	26.7514	0.946602
Q7MZE1	psuG2	26.9189	26.8527	25.9958	26.9943	-	26.3444	0.94589
Q7N6I5	hisF	26.8217	27.4021	26.7411	27.1135	26.9745	27.1198	0.945413
Q7N3Z6	dadA	27.8137	27.6027	27.7468	27.7877	27.9062	27.7131	0.945223
Q7MZN0	rsmC	29.221	28.9569	29.2692	29.2784	29.0553	29.3591	0.944828
Q7N7B1	proA	28.6385	28.1283	28.8246	28.6934	28.7192	28.4245	0.944821
Q7N3I9	entA	27.998	28.0773	27.9785	27.989	28.3697	27.9414	0.944666
Q7N364	nfo	27.3215	27.5402	27.5965	27.3359	27.496	27.8753	0.944108
Q7N6I7	plu1563	30.8681	31.2779	30.7645	30.9586	31.1485	31.0533	0.943874
Q7N054	ptsN	25.8022	-	25.5067	25.4732	25.8151	25.9273	0.943392
Q7N5H9	dsdA	26.436	26.3015	26.23	26.3296	26.3511	26.5396	0.943246
Q7N8X3	ribF	25.4102	24.8998	25.4704	-	-	25.345	0.94285
Q7N3S9	plu2634	27.7258	27.7229	27.7367	27.5485	27.9564	27.9384	0.942166
Q7N4H7	manA	25.1415	-	-	25.2736	25.1816	-	0.942056
Q7MYT7	plu4585	-	-	24.2359	24.3228	-	-	0.941524
Q7MB62	nagA	25.8987	25.46	25.1395	26.1156	25.1593	25.4851	0.941302
Q7MYW2	plu4554	-	24.0132	-	24.1006	-	-	0.941185
Q7N977	malP	27.5659	27.7233	27.5103	27.5616	27.7031	27.7977	0.941094
Q7MYJ0	plu4687	28.5719	29.1606	28.7548	29.0602	28.7828	28.9081	0.940874
Q7N3Y0	plu2582	25.7968	26.0179	25.6031	26.0236	26.0574	25.6085	0.939154
Q7N7H6	plu1173	27.2547	27.4873	26.9999	27.5505	27.4908	26.975	0.938572
Q7N0Y3	plu3746	27.4023	27.7873	27.7846	27.2767	-	28.2241	0.938017
Q7N8Z9	rob	26.2913	26.1495	25.9714	26.2311	26.1897	26.2684	0.938004
Q7N706	ispG	28.8242	28.0932	28.549	28.6646	28.4909	28.5881	0.937972
Q7N102	abgA	27.88	27.7214	28.1081	28.0386	27.7453	28.2036	0.93776
Q7N029	accB	31.0666	31.0194	30.7913	31.1825	31.2536	30.7217	0.937251
Q7N8X2	ileS	29.5081	29.9011	29.6326	29.7256	29.9687	29.6297	0.936874
Q7N4A5	plu2444	31.9806	31.9227	31.4485	32.1377	31.8547	31.6468	0.935747
Q7N199	gcvP	31.9061	32.0354	31.8024	31.9798	32.076	31.9803	0.934729
Q7N1X8	pdxJ	28.9367	28.8582	29.366	28.8704	29.2494	29.3356	0.934232
Q7N0E0	parE	26.2357	25.5861	25.3577	25.6382	26.0017	25.8371	0.933568
Q7N792	plu1266	28.7968	28.6211	29.617	29.1987	28.2858	29.8492	0.933281
Q7N0T5	plu3794	30.8421	30.6848	30.2251	30.6761	30.3762	30.9993	0.933141
Q7N8N6	fabZ	27.2235	-	27.526	26.9393	27.6709	27.8176	0.932279
Q7N8T6	ptrA	26.094	26.0177	26.0101	26.0734	26.0891	26.2639	0.932055
Q7N705	hisS	30.0334	29.9666	29.906	30.2234	30.0528	29.9344	0.932038
Q7N6N9	ybhR	-	-	24.9852	-	-	25.0877	0.931456
Q7N080	sspA	31.6742	31.878	31.6758	31.8296	31.9468	31.7628	0.930609
Q7N865	dksA	28.2074	28.577	28.0544	28.5908	28.4096	28.1514	0.930233
Q7MYE8	tuf2	30.8858	31.0986	31.3157	30.8275	31.2721	31.5149	0.929934
Q7N397	nagZ	25.0078	25.0988	24.8161	25.3503	24.975	24.913	0.92968
Q7N743	glnS	30.5531	30.5743	30.5906	30.7477	30.8382	30.4488	0.929431
Q7N6F1	lrp	32.142	32.2991	32.1859	32.3386	32.4265	32.1797	0.929216
Q7MYA9	plu4776	25.4445	-	-	25.4572	25.6449	-	0.928807
Q7N7X8	dtpB	26.3453	-	26.233	26.5759	26.4114	26.201	0.928537
Q7N4Z3	pntA	30.2649	30.8286	30.6717	30.7566	30.8838	30.4489	0.927846
Q7N6R1	pgl	30.0643	29.8286	30.0069	30.0509	30.1383	30.0349	0.927811
Q7MZY9	plu4118	27.9431	27.9725	28.2152	27.6275	28.2848	28.5445	0.927466
Q7N5N5	flgM	27.2388	-	26.7923	27.3114	-	26.9372	0.927401
Q7MYJ6	ilvA	27.3742	27.0836	27.1933	27.4884	27.2229	27.2698	0.926597
Q7N496	plu2456	26.4285	26.7918	26.2856	26.0759	26.6109	27.1499	0.92641
Q7MZF1	crtY	26.0765	26.6743	26.1669	26.5314	26.5878	26.1317	0.925875
Q7N0I5	secD	29.8736	29.7391	29.9615	29.8062	30.1786	29.9239	0.925651
Q7N3Z7	dadX	25.7478	26.263	26.1312	25.6192	26.4175	26.4407	0.925448
Q7MZJ8	plu4287	29.6177	31.1651	31.4983	31.3049	30.5526	30.7664	0.923839
Q7N8P0	ecfE	25.8146	26.2937	26.3072	26.2925	-	26.2135	0.923713
Q7N5C5	plu2029	30.121	30.2877	29.3188	29.8891	30.289	29.897	0.922821
Q7MZ98	aceB	26.2269	26.2895	26.3065	26.3669	26.4681	26.3366	0.922572
Q7N068	murA	27.6456	27.7398	28.2004	28.1356	27.8227	27.9767	0.922485
Q7N3Z9	gapA	33.149	32.9551	33.0274	33.165	33.3282	32.9888	0.922193
Q7MB41	aspS	29.9266	29.7015	29.7862	30.0742	29.7806	29.9128	0.921611
Q7N061	plu4036	27.9151	27.7035	27.9097	27.8356	27.7019	28.3463	0.921156
Q7NA87	rsmG	25.6956	25.7847	25.3003	25.9167	-	25.5074	0.921129
Q7N0D3	plu3957	28.9446	29.3369	29.3867	29.4682	29.4636	29.0921	0.9211
Q7N6N7	ybhF	25.8819	-	25.671	26.0629	25.8581	25.7747	0.918834
Q7MYU2	hflK	30.5605	30.6704	29.9653	30.6296	30.6021	30.3318	0.918622
Q7N176	acnB	31.9195	32.0838	31.9288	32.0916	32.0901	32.1225	0.917619
Q7N990	plu0453	24.877	-	24.7384	24.8128	25.1597	24.8253	0.917063
Q7N1X1	rseB	-	-	25.1321	25.2571	-	-	0.917004
Q7N6V5	sucC	32.2152	32.1894	32.0382	32.4249	32.2621	32.1318	0.916796
Q7NA95	atpC	27.7618	26.5372	28.8804	27.6386	29.0779	26.8398	0.916604
Q7N6Y2	gltX	30.3039	29.8335	29.5402	30.3092	30.1899	29.5577	0.91611
Q7N271	plu3220	31.4138	31.0765	31.488	31.4501	31.5562	31.354	0.915518
Q7N285	vacJ	-	-	27.2978	-	-	27.4253	0.915391
Q7N0H2	plu3916	28.2851	28.5214	28.0983	28.3548	28.9743	27.9618	0.91467
Q7N770	ogt	27.4377	27.1244	27.5799	27.0927	27.7048	27.731	0.91456
Q7N8W3	dapB	26.3943	26.5198	26.4674	26.5133	26.5757	26.68	0.914347
Q7N4C3	plu2425	24.3021	-	23.7914	-	-	24.176	0.914313
Q7MZB1	dltD	25.4656	-	25.9308	25.9365	25.7608	25.7872	0.913877
Q7N2V3	eutC	28.1185	28.7778	28.3614	28.6297	28.4434	28.577	0.913308
Q7N3U7	plu2616	26.5754	26.4814	26.7469	26.3744	27.0426	26.7817	0.912772
Q7N9J8	plu0332	27.6049	27.5506	27.5576	27.8492	27.7876	27.4719	0.912667
Q7N823	plu0925	29.255	28.8713	28.9837	29.139	-	29.1982	0.912609
Q7N8B7	afuA	25.4434	-	25.5971	25.6912	25.7457	25.5214	0.912223
Q7N3V8	purR	25.871	26.436	26.2361	26.1853	-	26.4427	0.911952
Q7N194	pepP	27.8541	27.8506	28.1921	28.0951	27.9138	28.2906	0.91116
Q7N851	plu0896	24.9853	24.4233	-	24.8407	-	-	0.909768
Q7MYC9	metL	27.0781	26.9976	27.3657	26.8322	27.6011	27.42	0.909211
Q7NA32	plu0113	29.8229	29.7677	29.8381	30.0062	30.0177	29.822	0.908109
Q7N2K3	menD	26.3602	26.3907	26.2068	26.4713	26.6116	26.2924	0.908046
Q7N8M5	rcsF	26.7997	26.212	26.9522	26.6915	-	26.8987	0.907198
Q7MYJ5	ilvD	28.7358	28.7437	28.8635	28.9997	28.6133	29.1519	0.90711
Q7N1B9	plu3557	27.2831	27.4691	26.9293	27.3364	27.4679	27.3018	0.906559
Q7N5I5	plu1964	30.8957	30.8418	30.7537	31.0365	31.2352	30.648	0.90572
Q7N936	tcaC	24.8332	25.2098	25.7844	25.4337	25.2234	25.6037	0.904689
Q7N485	trpA	30.3288	31.1493	30.5898	31.5591	30.3302	30.6122	0.904676
Q7N970	plu0477	28.1997	28.1475	28.3198	28.2425	28.4987	28.3609	0.904373
Q7N3A6	lolD	24.8404	24.9664	24.6805	24.6268	25.4721	24.8242	0.904202
P60005	uspE	27.3027	27.424	27.2409	27.6918	27.1427	27.5722	0.903529
Q7N7C8	plu1224	28.0979	27.3328	27.9232	27.7818	27.821	28.1955	0.902426
Q7N6L7	plu1532	26.7301	-	25.9316	26.3392	26.6668	26.4326	0.902081
Q7MYT3	plu4589	26.8643	-	25.864	26.5149	26.3259	26.6984	0.901918
Q7N2N3	plu3043	26.9739	27.282	26.93	27.2931	27.1124	27.2273	0.9019
Q7N5X6	plu1803	24.9817	24.9468	24.7685	24.8731	-	25.2231	0.901834
Q7MZI1	plu4306	25.4522	25.8978	26.3041	25.3089	26.0831	26.7137	0.900922
Q7N3B7	icd	32.9951	33.3287	32.9824	33.0786	33.4578	33.222	0.900778
Q7N9N8	plu0279	29.4096	29.5619	29.8942	29.939	29.4843	29.8998	0.899717
Q7MBA6	acs	27.4572	26.8459	27.6179	27.2469	27.5609	27.5716	0.899499
Q7MYM0	rffH	26.2012	26.5471	26.3192	26.293	26.5525	26.6818	0.899212
Q7N1X6	era	-	-	26.6007	-	-	26.7543	0.899029
Q7N2I5	plu3091	25.323	25.9403	25.3913	25.4857	26.0159	25.6145	0.898882
Q7N7B5	pepD	31.1714	31.4343	31.1054	31.3214	31.5454	31.3092	0.898164
Q7MAX9	purA2	30.6512	30.7293	30.656	30.8036	30.8365	30.8619	0.898035		+
Q7N9W2	nfuA	29.1212	29.4744	29.3691	29.5164	29.2626	29.6545	0.897357
Q7N0L0	plu3872	28.2543	28.6203	27.8357	28.8727	28.2862	28.0252	0.896306
Q7N4I6	plu2351	-	24.4533	-	24.7305	24.8717	24.2315	0.896298
Q7MY05	plu4894	26.315	26.8609	27.4544	26.7262	27.0186	27.3597	0.896209
Q7N220	treC	29.126	29.2541	29.0475	29.1275	29.4478	29.328	0.895921
Q7N0B1	plu3982	-	-	25.9652	-	-	26.1261	0.894442
Q7N522	minC	25.7661	25.5156	-	25.6998	25.8967	25.8095	0.894306
Q7N149	ddl	28.1069	28.072	27.642	28.17	28.2956	27.8423	0.893583
Q7N5A0	plu2056	30.6376	31.0051	30.0499	30.6384	30.8313	30.7108	0.893391
Q7MZQ4	plu4223	24.4211	24.245	-	24.496	-	-	0.893184
Q7MZX8	plu4131	23.9709	-	-	24.134	-	-	0.893098
Q7N2T4	cbiJ	30.5027	30.9617	30.5143	31.0251	30.5978	30.846	0.892924
Q7N958	plu0491	-	26.9273	26.4141	27.1083	26.856	26.5404	0.892417
F5HIJ2	cpmD	25.5951	-	25.6776	25.701	25.9573	25.7445	0.892161
Q7N3C6	plu2791	-	26.4868	-	-	26.6514	-	0.892126
Q7N2R1	plu3015	25.135	24.5589	24.9302	24.87	25.3356	24.9186	0.890884
Q7N137	fruR	29.2833	29.1145	29.2474	29.3671	29.4518	29.3309	0.889971
Q7MY17	plu4879	-	24.9756	-	25.0613	25.2267	-	0.889823
Q7N442	plu2512	28.0303	27.0974	27.7641	28.2728	27.0385	28.0874	0.88948
Q7N101	abgR	24.8058	-	24.3643	24.7922	-	24.7179	0.888864
Q7N8Z3	plu0566	26.9375	26.9912	27.2322	27.1382	27.283	27.2517	0.88842
Q7N3Y3	tpx	32.3043	31.9022	32.0793	32.2599	32.5724	31.9681	0.887911
Q7N439	plu2515	-	-	27.4671	-	-	27.6387	0.887833
Q7N158	coaE	25.0271	25.2246	24.5641	25.0482	25.2626	25.0212	0.88756
Q7N8V5	surA	29.0633	29.0567	28.8276	29.2843	29.1434	29.0419	0.886371
Q7MB40	msbB	24.975	-	24.9477	25.2646	-	25.0076	0.885918
Q7MZP9	plu4228	28.9999	28.4842	28.9542	28.8493	29.1785	28.9393	0.884994
Q7N3L6	manZ	28.4897	28.1812	28.2018	28.3313	28.6851	28.3883	0.884342
Q7N6T9	tolQ	24.6887	-	-	-	24.8684	-	0.882862
Q7N475	plu2479	26.1273	-	26.0567	26.2162	-	26.3295	0.882159
Q7NA69	plu0076	26.1757	-	25.2915	25.6987	26.046	26.0002	0.881845
Q7MYS6	psd	27.8428	27.6633	27.8125	28.1319	27.652	28.079	0.881824
Q7N0H7	phoB	26.3164	-	-	26.3717	-	26.6245	0.881645
Q7N7G5	plu1185	26.2321	26.7301	26.5304	26.5418	26.7627	26.7345	0.881405
Q7N6J2	asmA	24.1125	-	-	24.2949	-	-	0.881254
Q7N7X7	hpaC	-	25.3285	-	25.5136	-	-	0.879576
Q7N2H5	plu3102	29.5014	30.2871	30.6135	29.9539	30.1802	30.8295	0.878305
Q7N6D4	cmk	28.249	28.3526	28.467	28.6205	28.536	28.475	0.878041
Q7N2B9	purF	29.7572	29.6718	29.4277	29.7361	29.9549	29.7393	0.875901
Q7N9B1	tuf1	35.2189	35.2963	34.9507	35.3645	35.3753	35.3019	0.875408
Q7N8N7	lpxD	28.0761	27.6091	27.6974	27.7395	28.27	27.9498	0.87525
Q7MYP4	plu4631	27.2531	26.8213	26.7142	27.3223	27.4076	26.642	0.873922
Q7N3J5	plu2721	26.8379	26.5819	26.9354	26.6593	27.7396	26.542	0.873409
Q7MY81	wblK	25.4004	-	-	-	-	25.5963	0.87301
Q7NA70	sodA	33.3268	33.6679	32.5931	33.4452	33.6703	33.0607	0.872891
Q7NA20	ISPlu4G	29.6589	29.4148	29.7782	29.8111	29.5818	30.0479	0.872794
Q7MB56	plu1494	-	25.3047	24.9928	-	25.3454	-	0.872571
Q7N3F6	purN	25.3525	25.6907	25.6177	25.5564	26.0658	25.6298	0.872312
Q7N8P8	map	29.4086	29.6795	29.5591	29.6087	29.7982	29.8332	0.871956
Q7N870	panC	27.6847	27.2138	27.5278	27.7725	27.685	27.5625	0.871807
Q7MAX3	dut	27.1059	27.7677	27.0547	27.0883	28.0134	27.4253	0.870796
Q7N448	plu2506	-	26.6078	26.0254	26.3054	26.9967	26.25	0.870087
Q7N570	plu2087	26.7798	25.9258	26.2669	26.5629	-	26.4942	0.867907
Q7N4H8	fumC	32.7528	32.4998	32.4754	32.9462	32.5909	32.8053	0.867667
Q7N219	treB	27.8379	-	27.661	27.9258	-	27.9838	0.867343
Q7N3N9	plu2676	26.2831	26.6858	26.3313	26.4382	26.5975	26.8832	0.866797
Q7N2E9	plu3131	-	25.4696	-	25.3925	25.9627	-	0.865701
Q7N9W0	tyrS2	26.5437	26.6185	27.089	27.0766	26.5077	27.2971	0.864491
Q7N5D9	plu2013	28.7382	29.826	28.604	29.6185	29.4585	28.7224	0.86429
Q7N9X6	uxuB	24.9192	25.1047	25.1456	-	-	25.2675	0.863926
Q7MYC7	metJ	-	-	26.311	-	-	26.5241	0.862682
Q7N062	plu4034	26.6389	25.7989	26.6039	26.8294	-	26.2935	0.862013
Q7MZF3	plu4336	26.1927	26.3709	26.3436	26.5301	26.6023	26.4184	0.861817		+
Q7N3M6	ftnA	32.9853	32.9801	32.471	33.0541	32.9297	33.0975	0.86157
Q7N954	purH	28.6508	28.4333	28.2962	28.9388	28.1296	28.9572	0.861502
Q7N7U0	plu1012	-	-	25.2585	-	-	25.4748	0.860782
Q7MYW5	ppa	32.3958	31.1703	32.982	32.1228	32.35	32.7243	0.860758
Q7MYB0	plu4775	26.3259	26.1849	26.2747	-	26.4793	-	0.860096
Q7N085	arcB	25.7379	26.0388	25.8431	26.0456	25.9584	26.2696	0.859772
Q7MZ74	metE	32.7846	32.8219	32.7375	33.1165	33.0316	32.8505	0.859625
Q7N996	plu0447	25.6576	25.6008	25.6571	25.5204	26.0571	25.9944	0.859294
Q7N352	rplY	29.2502	29.4919	30.8561	29.7961	30.5217	29.9403	0.858577
Q7N3G6	plu2751	30.2884	30.3379	30.1521	30.5862	30.5074	30.3467	0.858175
Q7MYS7	rsgA	25.8465	26.2491	26.1891	26.3342	-	26.297	0.858153
Q7N0H6	sbcD	24.0218	23.5693	-	23.783	24.1214	24.1446	0.858111
Q7N9B4	rpsL	30.296	30.2748	29.5334	30.794	30.2991	29.6741	0.85799
Q7N6R2	plu1479	25.5793	25.769	25.1858	25.6077	25.7782	25.8121	0.857774
Q7N2J3	nuoH	26.1809	26.1473	27.1523	26.682	27.1351	26.3278	0.857711
Q7N845	hemL	29.1333	29.2272	28.7989	29.5633	29.2894	28.9717	0.85757
Q7N9R2	plu0252	26.8247	-	26.94	-	-	27.1044	0.857343
Q7N078	rplM	31.6864	31.4243	31.8688	32.082	31.5603	32.0048	0.857051
Q7N462	oppB	25.757	25.965	26.3662	25.7808	26.6932	26.2904	0.855332
Q7N955	purD	27.4939	27.5954	27.5089	27.773	27.5997	27.9042	0.854864
Q7N408	xthA	26.5776	25.4959	26.2798	26.3718	25.9263	26.7383	0.854007
Q7N6H2	sdaC	-	-	24.5218	-	-	24.7523	0.852304
Q7N583	kdsA	30.0434	29.9386	29.8711	30.0856	30.7062	29.757	0.851489
Q7N8K1	rpoS	27.7023	27.9151	28.2343	27.9602	28.0578	28.5346	0.850482
Q7N212	plu3295	25.9755	27.002	26.3903	26.3961	26.9545	26.7206	0.849978
Q7N291	hutI	30.054	29.5266	30.2667	30.1759	30.3655	30.01	0.849877
Q7MYG0	rpsQ	28.8536	30.5957	29.9933	29.3632	30.6106	30.1783	0.848831
Q7N4S0	plu2251	24.6815	-	24.6271	24.962	-	24.8218	0.848135
Q7N6M1	dkgB	26.7534	-	26.7019	27.2184	-	26.7128	0.847955
Q7N795	tyrA	25.7611	25.8441	25.9416	26.1354	25.9768	26.1492	0.847816		+
Q7N520	plu2140	28.6043	28.658	28.1167	28.8512	28.3307	28.9175	0.846673
Q7N6U2	cydA	28.2039	-	28.0772	28.5779	27.9406	28.6288	0.845615
Q7N3A5	lolC	-	-	24.5397	-	-	24.7826	0.845045
Q7N3G5	hda	-	-	27.22	27.2721	-	27.656	0.844372
Q7MYI6	aroE	24.8461	25.2675	24.6756	25.7481	-	24.5995	0.844358
Q7N6T4	plu1457	26.9062	27.0162	27.2051	26.8602	27.517	27.4869	0.843512
Q7N3F7	purM	27.6074	28.2881	27.966	28.0397	28.2886	28.2748	0.84252
Q7N405	plu2552	31.267	31.0931	31.0732	31.4253	31.4006	31.3514	0.842057		+
Q7MYY2	folP	26.3441	-	26.5257	26.7879	-	26.58	0.841427
Q7N6Z0	crr	31.266	31.2596	31.3967	31.7338	31.222	31.714	0.841388
Q7N5S9	cheZ	24.3509	-	-	24.6022	-	-	0.840151
Q7N381	plu2838	27.2336	27.3336	27.4587	27.7797	27.3866	27.6148	0.839904
Q7N5E2	plu2010	25.9779	25.5457	26.5149	25.8539	26.3258	26.6147	0.839759
Q7N126	leuD	28.3025	29.2021	28.7281	29.2815	28.6391	29.07	0.839367
Q7N2E0	lsrR	-	24.1615	24.5226	24.7966	-	24.3975	0.837987
Q7N9G1	gor	27.2539	26.8303	27.5593	27.3766	27.3929	27.6417	0.837478
Q7N143	murF	26.4721	26.4858	26.1376	26.8283	26.4271	26.6084	0.837339
Q7N5W6	plu1813	25.5571	-	26.4441	-	26.3697	26.1439	0.837296
Q7N798	rplS	30.8294	30.2686	30.8787	30.9654	30.877	30.9034	0.837198
Q7N0D7	nudF	25.5429	-	-	25.7288	-	25.872	0.836554
Q7N6P5	moaC	27.0798	26.8281	26.5456	27.225	27.2474	26.7542	0.836407
Q7N7G6	plu1183	25.106	-	25.0155	-	-	25.3203	0.835357
Q7MYW3	plu4553	-	24.2383	-	24.1862	24.811	-	0.834932
Q7N0S5	cysS	28.1162	27.7991	28.1502	28.3201	28.2235	28.3032	0.834839
Q7N3H9	plu2737	27.3179	27.0728	27.4289	27.5151	27.626	27.4603	0.834741
Q7MB94	plu0465	25.7171	-	25.9226	26.0802	-	26.0833	0.833986
Q7N1B7	plu3560	26.9607	27.3339	26.243	27.201	27.1854	26.9375	0.833871
Q7N6I4	hisA1	27.0475	27.0082	26.9154	27.444	27.3435	26.9765	0.832581
Q7N3U5	sufS	23.9797	-	-	24.1293	24.3598	-	0.832271
Q7N457	tdk	23.1046	-	-	23.3719	-	-	0.830896
Q7N7U7	plu1004	25.2375	25.4096	25.9597	-	25.7861	25.8202	0.830729
Q7N6B8	mukE	22.9688	22.8745	-	23.1895	-	-	0.830525
Q7MYV0	plu4568	30.7066	30.6448	30.4223	31.0267	30.9394	30.6161	0.829622
Q7M7F0	ISPlu9K	26.2174	-	26.622	-	-	26.6893	0.829573
Q7MZF0	crtI	26.0532	26.0751	26.7753	-	26.7854	26.357	0.829302
Q7N0N9	apt	28.6652	27.6941	28.1564	28.4774	28.3002	28.5531	0.828389
Q7N489	trpG	29.6592	29.4725	29.4459	30.24	29.5809	29.574	0.82792
Q7MYX8	greA	30.4478	30.8391	30.6647	30.8001	31.0174	30.9527	0.827664
Q7N384	fabH	28.6802	28.412	28.3593	28.6568	28.8963	28.7205	0.826993
Q7N7C2	plu1233	25.2776	-	26.4588	26.0319	26.1105	26.2845	0.826967
Q7N2A4	fabB	31.0926	31.2994	31.1074	31.5957	31.4699	31.2571	0.826777
Q7MY36	mutM	26.0606	25.2062	24.6528	25.7984	-	25.3788	0.822428
Q7N2Q6	plu3020	27.9199	28.7703	29.4592	29.4542	28.684	28.8579	0.822292
Q7N4V3	plu2212	28.1056	28.1388	28.3548	28.2789	28.6893	28.4813	0.821633
Q7N2V5	eutA	27.6181	27.4203	27.153	27.819	27.5651	27.6604	0.821104
Q7NAB9	plu0015	27.2616	27.9104	26.6802	28.3651	27.1661	27.1808	0.819813
Q7N7F7	gmhA	28.8148	29.5906	29.5678	29.2898	29.7698	29.7743	0.81965
Q7N3I6	plu2730	26.1891	26.035	25.9567	26.6756	26.2164	26.1531	0.818989
Q7N0Q7	copA	-	-	24.6709	-	25.0616	24.8618	0.817471
P63875	csrA	29.0694	28.2862	-	29.1635	29.3276	28.4149	0.817412
Q7N976	malT	-	-	23.5747	-	-	23.8658	0.817296
Q7N8Z1	tal	31.7148	31.7057	31.5223	31.9982	32.0647	31.7588	0.816226
Q7N3V3	ribE	26.4514	26.8634	27.0178	26.6281	27.3585	27.2304	0.815157
Q7MYY5	rimP	27.6927	27.1889	27.8575	27.7242	27.601	28.2995	0.814939
Q7N145	murD	24.6262	-	24.567	24.8935	-	-	0.814
Q7MYS2	plu4601	-	-	27.1551	27.4287	27.3512	27.5787	0.813499
Q7MBG8	fpr	26.1733	26.414	25.9489	26.3188	26.5969	26.5142	0.813454
Q7MZ80	rmuC	-	23.752	23.8089	-	-	24.0799	0.812582
Q7N0F8	plu3932	26.58	26.7898	26.4996	27.1004	27.2042	26.465	0.812204
Q7N0A4	plu3989	27.4845	28.4723	28.1847	28.5577	28.4044	28.0844	0.811328
Q7N2S9	cbiE	29.5374	30.1996	30.1529	30.1114	30.2934	30.3921	0.810949
Q7N614	plu1762	26.5861	26.6374	26.8295	27.2103	26.8459	26.9038	0.810942
Q7MZH5	plu4312	25.3155	25.211	25.3136	25.6892	25.6315	25.4283	0.810597		+
Q7N797	plu1261	30.3903	30.7387	30.5372	30.7727	30.948	30.8544	0.81056
P65114	infA	-	27.648	-	-	27.9527	-	0.809611
Q7N2H4	plu3103	28.3094	-	27.7856	28.6036	28.1604	28.2996	0.808304
Q7N289	sixA	-	23.8038	-	-	24.4327	23.7895	0.808147
Q7N409	plu2548	28.9597	29.0812	28.9605	29.5615	29.3681	28.9966	0.807611
Q7N4J8	plu2339	27.7155	26.7854	25.672	27.5557	26.8099	26.7382	0.806476
F5HGP5	cpmB	30.7299	30.051	32.0907	31.2887	30.7288	31.7879	0.805912
Q7N3V9	plu2604	30.0129	29.398	30.2588	30.4838	-	29.9198	0.805579
Q7N964	thiE	-	-	25.473	25.7277	25.5924	26.0367	0.805199
Q7N9C1	slyD	29.0408	30.0283	29.9604	29.6025	29.7679	30.6153	0.801762
Q7MZJ5	plu4290	-	-	24.4475	-	24.6316	24.9011	0.801717
Q7N2S4	plu3001	-	-	26.4568	26.5391	-	27.014	0.801189
Q7N9X5	uxaC	-	-	24.6647	-	25.0226	24.9474	0.800926
Q7NA76	rbsK	-	24.8923	25.5154	25.5369	25.5503	25.4868	0.80061
Q7N557	cutC	25.6444	25.9062	26.1292	26.062	26.3278	26.2583	0.799535
Q7N8Q1	plu0668	31.231	31.3013	30.9547	31.5898	31.5706	31.298	0.798974
Q7N8V8	apaG	27.0138	27.0714	26.9051	27.5342	-	27.1078	0.79874
Q7N6F3	cydD	-	22.9146	-	-	23.2389	-	0.798702
Q7N3G3	celA	27.2301	-	-	27.6722	-	27.4438	0.796704
Q7MYV7	cysQ	27.8492	28.4026	27.8666	28.3798	28.1549	28.5703	0.796167
Q7N2N2	plu3044	28.4416	28.476	28.3943	28.7807	28.6596	28.8587	0.796053		+
Q7N4R2	plu2260	30.9433	30.7399	30.5388	31.1963	31.1349	30.8786	0.79593
Q7N4B7	acnA	30.1557	30.296	30.1879	30.5035	30.5478	30.5776	0.795676		+
Q7NA60	plu0085	-	-	27.1495	-	-	27.4798	0.795377
Q7NA61	trpS	29.3366	29.5305	29.3063	29.6637	29.8392	29.666	0.794548		+
Q7N2N8	plu3038	-	-	26.0209	-	-	26.3543	0.793691
Q7N3J4	dapE	22.908	-	-	23.2434	-	-	0.792559
Q7N490	trpE	30.1128	31.0839	31.0136	31.6507	31.3661	30.2063	0.791379
Q7N3L8	manX	29.4639	29.2052	28.8922	29.6583	29.6831	29.2354	0.79086
Q7N2S8	cbiD	29.8238	29.612	29.8256	30.5212	29.6996	30.0567	0.790741
Q7N3Z5	fadR	27.7253	27.5346	28.2624	28.1082	28.3277	28.1053	0.790255
Q7N1X4	lepB	28.1527	28.8017	28.2385	28.698	29.2941	28.2201	0.790178
Q7N985	malE	30.3683	29.9001	30.0592	30.4434	30.4891	30.4241	0.788378
Q7N7Z4	fba	30.5903	30.6164	30.6702	30.7149	31.0642	31.1278	0.788218
Q7N5D8	plu2015	27.8829	28.4271	27.6918	28.3643	28.8574	27.8103	0.788185
Q7N588	lolB	25.9801	26.1488	-	26.3616	26.2777	26.5875	0.787598
Q7MZD5	tyrB	30.1038	30.4267	30.0128	30.7431	30.463	30.3725	0.787228
Q7N458	adhE	28.9291	29.0828	29.022	29.3558	29.2158	29.5003	0.786752		+
Q7N4T0	plu2237	26.7613	26.6253	26.7071	26.9508	27.0446	27.1391	0.786272		+
Q7MYH1	secY	28.039	27.4485	28.3632	28.5451	28.2639	28.0845	0.78589
Q7N3F9	plu2758	24.2852	-	23.9418	24.8429	24.3226	24.2221	0.785097
Q7N394	plu2825	28.4623	28.9872	28.2382	28.8565	28.744	29.1365	0.784696
Q7N8M9	rof	27.7555	27.5738	27.4006	28.1924	27.5542	28.0424	0.782938
Q7N8S8	plu0639	25.2038	-	-	25.5028	-	25.6129	0.782404
Q7N0M0	queC	30.4741	29.7878	30.5742	30.8471	30.6275	30.4316	0.780974
Q7MYD5	argE	28.1114	28.5401	28.5738	28.678	28.5725	29.0469	0.780599
Q7N450	purU	27.0001	27.2519	27.2611	27.4182	27.5219	27.6462	0.780399		+
Q7MYW9	mdh	32.6197	32.482	32.3401	32.7848	32.929	32.8028	0.780069		+
Q7MYB3	tpiA	31.3917	31.4658	31.1164	31.9089	31.7781	31.3631	0.779858
Q7N2N6	plu3040	28.9481	27.8969	28.7279	29.1033	-	28.6635	0.779635
Q7N5H2	plu1977	25.6646	25.4832	25.4155	26.1401	25.8122	25.691	0.779172
Q7MYV1	plu4567	30.5841	30.9567	31.0263	30.7037	31.3021	31.6441	0.778662
Q7N4J3	plu2344	27.0274	27.0761	27.0599	27.6888	27.1871	27.3728	0.778229
Q7N3W6	tyrS1	30.0079	30.1581	29.8328	30.474	30.3283	30.2899	0.776756		+
Q7MB21	plu2851	-	23.8841	-	24.0454	24.4555	-	0.775727
Q7N7W7	gabD	30.4412	30.4483	30.4331	30.8394	30.7886	30.7968	0.775175		+
Q7MZH1	folD	27.0579	27.4767	27.3215	27.6453	27.5722	27.7414	0.775074		+
Q7N835	eno	32.7882	32.7589	32.7318	33.1762	33.1933	33.0132	0.774908		+
Q7NA23	opdA	30.2887	30.5405	30.2465	30.789	30.7065	30.6957	0.772786		+
Q7N6Y7	cysK	31.3067	30.8379	31.5152	31.3931	31.7184	31.6639	0.772766
Q7N1A7	plu3574	23.8555	-	24.1028	24.2418	24.4777	24.3352	0.772468
Q7N517	plu2143	29.902	29.8477	29.6209	30.5724	30.0377	29.8848	0.771216
Q7MZB0	dltB	-	-	23.7253	-	-	24.1016	0.770406
Q7N6Z1	cysM	25.6895	25.3381	26.1283	25.93	26.2319	26.1229	0.770404
Q7MZK5	plu4280	25.2903	25.1212	25.3852	25.1693	25.9359	25.8229	0.769966
Q7N7X4	plu0977	24.8295	-	24.6657	25.241	24.7974	25.3377	0.769625
Q7N4T5	plu2232	27.7662	-	28.0802	-	-	28.3024	0.76889
Q7N1G5	lip-1	28.7136	28.8241	28.8216	29.0671	29.2349	29.195	0.76885		+
Q7N6C3	plu1633	28.9042	29.1068	28.7615	29.6923	29.2794	28.9413	0.768361
Q7N4H5	add	29.8421	29.7975	29.9338	30.1913	30.3261	30.1986	0.76798		+
Q7N9Y1	uxuA	25.7698	25.4044	25.6746	26.217	25.796	25.9795	0.767776
Q7MZY2	frdC	26.6328	-	-	27.1668	-	26.862	0.767615
Q7N6E3	pflA	-	-	25.4381	-	26.3561	25.2896	0.765896
Q7N8J0	plu0732	27.4485	27.6246	-	27.9213	-	-	0.765875
Q7MZF7	adhC	28.2325	27.0946	27.9929	28.1327	28.3976	27.9492	0.764973
Q7N7Z5	pgk	32.1228	32.2223	31.6994	32.3846	32.6183	32.2131	0.762846
Q7MZZ2	gldA	31.9906	31.7465	31.7181	32.5985	32.2106	31.8205	0.762382
Q7M7H8	gshB	28.8843	29.0169	28.7675	29.1279	29.4589	29.2571	0.762201		+
Q7MZ93	pepQ	28.8698	28.6255	29.1318	29.4609	28.9882	29.3551	0.761877
Q7N712	plu1370	26.6561	26.8477	27.3454	27.1166	27.7781	27.134	0.761462
Q7N6G9	grxA	29.0231	29.2872	28.6078	29.5294	29.523	29.0523	0.760208
Q7N8Y7	galK	-	-	25.4942	-	-	25.89	0.760105
Q7N8I1	plu0743	25.6694	25.1617	25.4696	26.0303	25.9193	25.5395	0.75988
Q7MZB7	plsB	27.3846	27.241	27.915	28.0736	27.6962	27.9639	0.759069
Q7N5X3	plu1806	29.4669	29.6021	29.524	29.9101	29.9603	29.9166	0.758904		+
Q7N2G1	plu3119	25.2729	-	25.7827	25.764	26.0283	25.9893	0.758181
Q7MYB9	rraA	-	-	28.4439	29.2374	-	28.4498	0.758034
Q7N487	trpC	31.554	31.5012	31.3696	32.0747	31.7552	31.7951	0.757823		+
Q7N6B7	mukB	25.1752	26.5999	27.1536	26.9954	25.7847	27.3493	0.757743
Q7N2T7	cobQ	29.3867	29.1732	28.8398	29.7555	29.3855	29.4596	0.757697
Q7MZB2	dltC	27.0722	27.3551	27.1201	27.3076	28.185	27.2666	0.755821
Q7N7W4	hpcB	29.5852	29.6322	29.1917	30.194	29.6822	29.7465	0.755484
Q7MYN3	cyaY	27.7434	27.6873	27.4357	-	-	28.0273	0.755133
Q7MZC1	plu4371	31.9584	32.0976	31.6385	32.3985	32.2425	32.2711	0.754783		+
Q7N2J7	nuoL	27.1761	26.1396	-	26.9671	27.1634	-	0.753997
Q7N6M7	plu1519	26.4679	-	26.8827	26.9577	26.8883	27.4054	0.753412
Q7N0T2	plu3797	31.2828	31.2939	31.3933	31.7411	31.7543	31.7021	0.753053		+
Q7N444	plu2510	24.2425	-	24.2831	-	-	24.6725	0.752785
Q7N066	plu4030	25.9071	-	25.6736	26.2029	-	-	0.751286
Q7N3B0	plu2809	-	29.0832	30.1883	29.4393	30.6942	30.019	0.749967
Q7N2S7	cbiC	30.1521	30.3171	29.389	30.7705	30.154	30.1907	0.747948
Q7MZ90	fre	25.8585	25.8947	25.9633	26.1704	26.468	26.3408	0.746964		+
Q7N202	glnB	28.1947	28.3359	28.2097	28.5607	28.6954	28.7484	0.746707		+
Q7N132	plu3670	25.9644	-	24.763	25.7853	-	-	0.746604
Q7MYW4	plu4552	25.9796	25.0386	25.8688	25.9484	26.1546	-	0.746161
Q7N2G7	astC	28.1938	28.109	28.0257	28.3926	28.6038	28.6042	0.745347		+
Q7N931	deoB	29.867	30.0916	29.6771	30.2399	30.4546	30.2142	0.745174		+
Q7N0H5	sbcC	26.0377	26.0004	25.5762	26.5357	25.9981	26.357	0.7446
Q7N790	rluD	25.5673	25.9316	25.45	26.3878	26.1425	25.7064	0.742634
Q7N5H8	plu1971	32.74	33.0658	32.5083	33.2095	33.1655	33.2273	0.742557
Q7N739	plu1323	26.6979	26.7425	26.5859	27.2133	-	26.9996	0.741758		+
Q7MYL9	rffG	25.3857	25.7007	25.2117	25.5853	25.8839	26.1243	0.741343
Q7N0S4	ppiB	30.4927	30.0201	30.0384	30.7584	30.6942	30.396	0.74099
Q7N3H3	purC	30.3319	30.3989	30.1756	30.5509	31.0955	30.5587	0.740783
Q7N4J5	plu2342	31.3004	30.5968	30.969	31.8202	31.1383	31.2104	0.740087
Q7N6Y8	ptsH	29.2711	29.9455	29.5409	29.565	30.1842	30.3146	0.739472
Q7N2D5	lsrG	28.1972	28.5259	28.3208	28.6491	28.6798	29.0236	0.739084		+
Q7MAY9	plu4391	-	24.7608	25.0727	-	25.3287	25.3786	0.738736
Q7N963	thiC	28.2921	28.2274	28.2664	28.699	28.7999	28.6001	0.738326		+
Q7N3H0	gcvR	27.3272	27.2984	27.3137	27.8585	27.4725	27.9215	0.738309		+
Q7N058	lptA	26.7895	26.9283	26.1739	26.91	27.3207	26.986	0.736299
Q7MYJ4	ilvE	29.6977	29.0469	29.5112	29.8639	29.8062	29.9173	0.73517
Q7MYM2	wecE	25.7974	25.7475	25.9202	25.9591	26.3322	26.5084	0.734632
Q7MY47	kbl	31.3757	31.7007	31.1656	31.9865	31.8688	31.7272	0.733636
Q7MY54	gpsA	27.6085	26.3536	26.8483	27.3588	27.3491	27.4466	0.733033
Q7N579	plu2077	25.7317	26.1494	25.8766	26.5282	26.5019	26.0728	0.732874
Q7MYC4	cytR	26.1359	-	-	-	26.5859	-	0.732053
Q7N8Z4	thrC	29.3891	29.3722	29.121	29.8234	29.7829	29.6328	0.73089		+
Q7N2U5	plu2979	24.7036	-	-	-	-	25.1566	0.730497
Q7N3I8	entB	28.6729	27.9126	28.854	28.9644	28.6069	29.2419	0.72804
Q7MZV0	plu4174	25.9953	25.4301	25.3522	26.7096	-	25.3913	0.728034
Q7MZR6	plu4211	-	-	25.1694	25.4266	-	25.8325	0.726931
Q7N9B5	tusB	-	24.5132	-	-	24.9743	-	0.726442
Q7N0K8	plu3874	26.3645	-	-	26.1021	27.5539	-	0.72525
Q7N2V7	cobD	-	-	23.805	-	-	24.2726	0.723182
Q7N4I8	plu2349	33.171	33.201	33.0181	33.5238	33.5833	33.6865	0.723055		+
Q7N4J9	plu2338	28.9273	28.4054	29.3203	29.4077	29.0419	29.6108	0.722418
Q7N841	mtnN	29.8043	29.5208	28.9592	30.0836	29.8952	29.7157	0.721931
Q7MZP3	plu4238	24.8828	24.6331	-	25.369	25.09	-	0.721179
Q7N6L9	plu1530	26.5969	26.7863	27.2782	27.2975	27.1932	27.5919	0.720102
Q7MZJ6	iunH	31.8335	31.9285	31.498	32.3297	32.2496	32.1025	0.719986		+
Q7N787	pssA	27.7389	27.2477	28.2123	28.59	27.7985	28.2398	0.718754
Q7N5X4	plu1805	29.1912	29.2625	29.286	29.8349	29.6174	29.718	0.71853		+
Q7N2K6	menC	-	-	24.4459	-	-	24.926	0.716963
Q7N8G8	plu0757	-	-	24.6948	-	24.8636	25.4871	0.716684
P68702	atpE	-	-	29.6053	30.2122	-	29.9628	0.715893
Q7N9P9	plu0266	25.2132	25.0251	25.5721	25.8394	25.8417	25.5803	0.715163
Q7N3W7	pdxY	28.7856	29.0507	28.7128	29.2964	29.4547	29.2491	0.71513		+
Q7N744	nagE	27.7679	28.0328	27.9076	28.3113	28.6078	28.2563	0.712481		+
Q7N3M4	pip	-	-	26.337	26.3766	-	27.2783	0.71181
Q7N376	plu2843	-	28.8093	27.9335	28.82	28.829	28.9375	0.711657
Q7N5H0	sgcA	23.7492	24.3459	-	-	24.5401	-	0.710748
Q7N901	plu0558	26.1327	25.9683	25.7515	26.4056	26.392	26.5365	0.710121		+
Q7N2C2	plu3164	30.0992	30.2419	30.2457	30.327	30.8458	30.8961	0.710047
Q7N3D6	fbaB	32.477	32.246	32.292	33.0503	32.8059	32.646	0.709195		+
Q7N163	ampE	27.3147	27.0455	27.577	27.6657	27.9553	27.806	0.708777		+
Q7N5P2	plu1905	26.0765	26.1358	25.4058	26.2137	-	26.5264	0.708404
Q7N198	gcvH	30.6944	30.8895	29.8355	31.1304	31.4468	30.3355	0.708202
Q7MZH3	plu4314	25.0963	-	-	25.5967	-	-	0.706945
Q7N9S3	plu0241	27.9353	27.7772	27.7143	28.3479	28.5127	28.0896	0.703292		+
Q7N4P9	bglA	25.8073	26.2363	26.0107	26.4783	-	26.579	0.701956
Q7N5J0	putP	-	-	26.3091	26.822	-	-	0.700798
Q7N4C4	plu2424	26.9581	26.4451	26.5484	27.5077	26.9216	27.0677	0.699722
Q7N6F2	trxB	29.9153	29.8033	29.9133	30.1826	30.493	30.5109	0.698257		+
Q7N786	plu1272	26.2559	26.2856	27.4691	27.1331	26.6583	27.7853	0.696412
Q7N796	aroF	27.3613	27.4864	27.4452	27.8682	27.9732	28.0231	0.695502		+
Q7N0Y8	plu3741	25.6281	25.4248	25.6233	26.234	25.6933	26.3236	0.695017
Q7MYL3	trxA	31.1216	30.1846	31.1405	31.3618	31.2867	31.3737	0.69488
Q7N4A2	plu2450	27.572	26.8272	27.6531	27.9948	28.003	27.6319	0.694558
P60004	uspA	31.3154	29.6589	29.8576	31.143	30.9392	30.3292	0.694229
Q7N4M2	plu2303	28.2861	28.3005	27.9209	28.7062	-	28.6875	0.693661		+
Q7N5H3	plu1976	29.8795	30.3127	29.9665	30.2331	30.9969	30.5189	0.692524
Q7N736	fur	28.7527	28.8489	28.8134	29.1718	29.536	29.2997	0.69218		+
Q7N3Y4	mppA	25.7176	-	-	26.4143	26.1344	26.2028	0.691185
Q7MB17	truA	-	-	24.4671	-	-	25.0001	0.691092
Q7N2T6	cbiL	29.8177	29.5979	30.0252	30.354	30.1683	30.5203	0.690688		+
Q7N3P8	rpmI	-	-	26.9198	-	27.4551	-	0.690001
Q7N8S6	plu0641	27.7433	-	28.113	28.2724	-	28.6549	0.689905
Q7N0Y9	plu3740	26.8777	-	26.8159	26.9585	27.7417	27.4517	0.689129
Q7N735	fldA	28.2711	28.3584	28.3483	28.5955	29.3782	28.6165	0.688969
Q7N5Q3	plu1891	26.7376	-	26.4074	27.0347	27.4118	26.8869	0.6884
Q7N8W0	folA	28.1187	28.2427	27.9013	28.5715	28.6882	28.6198	0.688296		+
Q7N626	plu1749	28.7413	28.1284	29.0667	29.0934	28.7706	29.6936	0.687599
Q7N7W9	hpaI	27.4184	27.716	27.276	28.0773	28.1164	27.8544	0.684977		+
Q7N782	emrA	27.0379	26.7798	26.9952	-	-	27.4839	0.684776
Q7N5A7	plu2049	27.2576	27.2631	27.05	27.9587	27.6216	27.6326	0.684258		+
Q7N7B4	gpt	-	-	26.9135	-	-	27.4617	0.683892
Q7MYV8	plu4558	28.2866	27.8745	28.1509	28.9653	28.5842	28.4175	0.682239
Q7N5P6	plu1900	28.602	28.6991	28.7164	29.2917	29.1243	29.2584	0.68194		+
Q7MYN1	hemC	27.4825	26.6998	27.0478	27.8391	27.7938	27.2564	0.681564
Q7N2U6	plu2978	-	-	24.3171	-	-	24.8723	0.680549
Q7MYH0	rplO	31.1603	30.4456	30.9452	31.3736	31.8414	31.004	0.680192
Q7N216	glyA	32.0826	32.0705	31.8668	32.6642	32.7069	32.3184	0.679923		+
Q7N8F9	plu0767	27.9231	27.4069	28.2347	28.1635	28.4936	28.5775	0.679899
Q7N5C2	plu2032	29.8339	30.1776	30.1652	30.5937	30.6397	30.6175	0.679218		+
Q7N1U8	ung	28.7587	28.0922	28.8392	29.0289	29.2457	29.0929	0.678724
Q7MYU7	rpsF	30.3666	30.3762	30.6736	31.3574	31.0866	30.652	0.678371
Q7N179	plu3616	-	-	24.3082	-	-	24.8686	0.678128
Q7MY33	walN	25.3654	-	25.5947	26.0495	-	26.0334	0.677621		+
Q7N8Q7	queF	27.5306	27.8187	27.5568	28.3121	28.1518	28.1286	0.677297		+
Q7N7W8	hpcG	28.9643	29.0134	28.4956	29.7228	29.1727	29.2672	0.676849
Q7N2H3	plu3104	29.4152	29.495	29.5049	29.3499	30.0176	30.7371	0.676824
Q7NA89	atpB	28.1769	27.1576	28.2668	28.3177	28.8502	28.134	0.67507
Q7N5E4	plu2008	28.7483	28.9085	28.5782	29.5327	29.0982	29.3084	0.674489		+
Q7MZP6	plu4232	29.1527	29.1707	28.9999	29.6864	29.5039	29.8456	0.673236		+
Q7N3N4	htpX	26.0477	-	-	-	26.62	-	0.67253
Q7NAC7	asd	28.7667	28.7647	29.4767	28.6206	30.1513	29.9582	0.67175
Q7N6C2	kdsB	28.2453	27.8043	27.8948	28.3422	28.6319	28.6974	0.670954		+
Q7N5I9	xylB	25.4149	25.7018	25.0895	26.0076	25.9427	25.9849	0.670649		+
Q7N6M6	sseA	28.1005	28.1561	27.4682	28.5053	28.5455	28.4143	0.668916
Q7N3I4	plu2732	-	-	26.7567	-	-	27.3372	0.668732
Q7N6H9	plu1571	26.3314	26.6699	26.4179	26.9083	27.3686	26.8847	0.668582		+
Q7MY48	tdh	28.1945	27.3516	28.0064	28.6925	28.2727	28.3328	0.668131
Q7NA91	atpH	29.5182	29.2232	29.7491	30.007	30.5956	29.6535	0.665002
P60155	syd	23.3724	-	-	23.7611	24.1617	-	0.664797
Q7N5J8	plu1950	25.8688	-	25.9637	26.7733	26.4045	26.3426	0.664076		+
Q7N3Q6	arnC	24.9519	-	-	25.2019	25.8968	-	0.660905
Q7N5P7	plu1899	25.7136	25.6428	-	-	26.2759	-	0.660811
Q7MZD2	qor	30.8052	30.9966	30.6953	31.4394	31.5251	31.3329	0.659717		+
Q7N8C5	plu0803	28.3916	28.5903	27.6012	28.9573	28.8597	28.5694	0.659237
Q7N6D5	aroA	28.1826	29.046	28.8427	29.2181	29.093	29.5686	0.658473
Q7MYL1	gppA	24.4863	-	-	-	-	25.0901	0.658032
Q7N2Q8	plu3018	-	24.7464	24.828	-	-	25.3932	0.657036
Q7N6H6	plu1574	29.7691	29.226	30.3507	30.1252	30.3848	30.6664	0.655104
Q7N2G9	astD	27.0187	27.3614	27.989	28.1222	28.2936	27.7917	0.653931
Q7N5Q2	plu1893	24.2946	24.8198	-	24.8061	25.5363	-	0.653376
Q7MYI5	tsaC	25.4823	-	25.2039	25.8998	-	26.0205	0.652001
Q7NAC9	plu0005	28.4035	27.7839	28.6671	29.0917	28.8157	28.8079	0.650558
Q7N3N7	plu2678	26.3282	26.3037	26.2278	26.7987	27.1064	26.8274	0.648769		+
Q7N8W2	carA	30.1783	30.1883	29.9765	30.823	30.7872	30.6069	0.648553		+
Q7N4B2	plu2437	27.3161	27.3553	-	28.121	27.8659	27.8975	0.648068		+
Q7N997	plu0446	-	24.3116	23.9814	24.5669	-	24.9782	0.647955
Q7N3T8	plu2625	26.8868	26.6828	26.4511	27.5804	26.8447	27.4749	0.647785
Q7N0S6	plu3803	30.6583	31.0802	30.7665	31.7058	31.3272	31.3645	0.645797		+
Q7MB74	plu0824	26.1358	26.1078	25.4495	26.4678	26.7157	26.416	0.643725
Q7N0C9	plu3962	25.3235	24.9933	-	25.7843	-	25.8078	0.642766
Q7N366	plu2855	-	-	23.7733	-	-	24.4114	0.642554
Q7N809	gloB	27.2382	27.4257	27.7388	27.8221	28.2186	28.2989	0.639214		+
Q7MB42	plu2084	-	-	25.3175	-	25.7623	26.1664	0.638656
Q7N1Y5	plu3329	27.2406	26.8777	26.4796	27.8944	27.1968	27.4489	0.638443
Q7MZN4	osmY	28.5978	-	28.2437	29.2686	-	28.8684	0.638273
Q7N710	ndk	29.908	29.2091	29.4984	30.1293	30.258	30.177	0.637453		+
Q7N9L6	plu0306	26.2096	26.244	26.376	26.6795	26.8021	27.307	0.635979		+
Q7MY25	pyrE	26.7336	26.5841	26.7203	27.3977	27.406	27.1974	0.63534		+
Q7N0A3	fadH	26.3909	26.3794	26.7279	26.8509	27.4178	27.1968	0.63475		+
Q7N0G9	plu3919	29.0271	28.8294	28.5367	29.6247	29.5392	29.1997	0.634276		+
Q7N7A7	plu1248	-	24.9457	24.8097	25.1676	25.8935	25.5615	0.631496
Q7N1Z2	adiA	24.7391	-	-	25.4105	-	-	0.627884
Q7MBA4	plu0240	-	27.3067	27.6151	28.1341	28.0751	28.2031	0.625668		+
Q7N3T0	plu2633	31.1417	31.2678	31.2295	31.7449	32.188	31.7391	0.625171		+
Q7N3A4	mfd	25.0423	-	25.6752	25.9266	26.1129	26.0804	0.62366
Q7N0E4	dkgA	31.2847	31.4403	31.0736	31.9288	32.1875	31.7302	0.623004		+
Q7N8K6	ispF	26.0276	25.143	-	26.8001	26.012	26.0204	0.618916
Q7N754	gltL	-	-	26.1176	27.6909	-	25.9295	0.618736
Q7N5B9	plu2035	26.8544	26.7558	27.3345	27.7303	27.3013	27.9937	0.618336
Q7N5C4	plu2030	30.2787	30.1747	30.2995	31.0231	30.9242	30.8895	0.617889		+
Q7N5P5	plu1901	27.6636	27.7489	27.5476	28.3074	28.4259	28.3154	0.617213		+
Q7MZ13	plu4498	30.3376	30.4939	29.9205	31.2304	30.8651	30.7658	0.614247		+
Q8KM01	luxS	32.0634	32.0081	31.1528	32.3819	32.7406	32.2119	0.614137
Q7N0H1	plu3917	27.7999	27.383	28.1722	28.7029	28.377	28.3951	0.612758		+
Q7N2T2	cbiG	27.862	27.9246	27.6521	28.588	28.1467	28.8323	0.61155		+
Q7N1B8	plu3558	28.3667	28.3085	28.2172	29.0553	28.8944	29.0747	0.611026		+
Q7N182	plu3613	25.075	-	25.315	-	-	25.9093	0.609516
Q7N031	plu4072	29.2186	28.8636	28.9106	29.8916	29.6681	29.5915	0.607306		+
Q7N3X8	pspB	-	-	24.7392	-	-	25.4626	0.605689
Q7N9N5	plu0282	27.5348	-	-	-	-	28.2587	0.605479
Q7N0H0	plu3918	27.6442	27.8091	27.7299	28.3438	28.6136	28.3998	0.605137		+
Q7N0L1	bolA	29.6684	29.0367	29.312	29.9983	30.3058	29.8898	0.604736		+
Q7N5E0	plu2012	27.5413	27.6529	27.4414	27.8387	28.7591	28.2222	0.603689
Q7N5Z6	plu1781	27.0421	25.9747	26.195	26.7727	27.5073	27.1186	0.603351
Q7N810	mltD	-	-	24.8739	-	-	25.604	0.602875
Q7N4A6	plu2443	31.7269	30.78	31.3509	32.1423	32.2969	31.6335	0.599438
Q7N416	plu2539	28.1879	28.621	27.5391	29.6054	28.7566	28.2051	0.598849
Q7NA45	pckA	30.6776	31.2315	31.0519	31.7988	31.5858	31.7959	0.598813		+
Q7N0Y2	plu3747	25.5647	26.1742	25.6232	-	26.8566	26.2032	0.597671
Q7N9G2	rlmJ	27.4352	27.6197	27.9177	28.0563	28.4599	28.6874	0.597215		+
Q7N4I9	plu2348	32.1581	32.2407	32.0957	33.1955	32.7805	32.7727	0.594028		+
Q7MZK6	plu4279	29.5216	30.0424	29.8251	30.5312	30.6071	30.5114	0.59316		+
Q7N4J2	plu2345	26.6824	26.3676	25.8385	27.1034	26.7778	27.2699	0.592868
Q7N5I8	plu1960	28.6202	29.2994	29.1301	29.9682	29.5786	29.7752	0.591549		+
Q7MYR5	plu4608	-	25.5011	-	26.3068	26.429	26.0561	0.589345
Q7N2C0	ubiX	25.5805	25.4067	25.582	26.2473	-	26.3255	0.589129		+
Q7MZA3	plu4390	-	23.3159	-	-	24.0826	-	0.587756
Q7MB46	fabA	30.5438	29.5532	30.6432	30.9227	31.0862	31.0536	0.584753
Q7N515	ldhA	26.4993	-	25.5762	27.0401	26.8498	26.5556	0.583425
Q7N7D2	plu1218	27.251	26.6923	26.7945	27.7635	28.0634	27.2675	0.580143
Q7N4D2	plu2409	-	-	24.9834	-	-	25.7754	0.577551
Q7N6D9	ansB	31.2453	31.2929	31.0663	32.0403	32.1195	31.8246	0.577031		+
Q7N8W1	carB	31.0556	30.919	30.6397	31.8261	31.6542	31.523	0.575823		+
Q7MZU7	plu4177	25.8479	25.6578	25.9277	26.4929	26.6091	26.7242	0.575312		+
Q7MB44	plu1882	26.7103	26.3344	26.886	27.3819	27.2087	27.7694	0.570462		+
Q7N5A9	plu2046	29.0109	29.0451	28.9729	30.2276	29.3036	29.9316	0.56988		+
Q7N0T0	atoD	25.7109	25.0181	-	26.3688	25.8775	26.2826	0.569677
Q7N7W1	hpaG1	29.4456	29.5125	28.9138	30.3654	30.2438	29.7097	0.568154		+
Q7N0F7	plu3933	-	-	25.8	-	-	26.6163	0.567908
Q7N9L5	plu0307	26.9374	26.3679	27.3494	27.2664	28.5329	27.3073	0.567502
Q7N051	rnk	27.3536	-	27.4414	27.6864	28.4506	28.5075	0.567501
Q7N4Z4	plu2166	29.3585	29.0666	29.1769	30.1588	29.979	29.9235	0.566531		+
Q7N4J0	goaG	28.1726	28.1932	28.1736	29.1527	28.885	28.9709	0.565234		+
Q7N5N7	plu1911	25.3382	-	26.1905	-	-	26.5934	0.562931
Q7N9C0	slyX	26.6316	26.9956	25.9484	-	27.4229	27.2887	0.562289
Q7M7B0	plu0547	24.8534	-	-	25.1946	26.1736	-	0.562245
Q7N8D1	hisA2	-	-	23.7626	-	-	24.5987	0.560179
Q7N544	znuA	27.2448	26.1249	26.6377	27.6285	-	27.3942	0.557796
Q7N2T5	cbiK	29.1859	29.5152	28.9939	30.2985	29.7292	30.2068	0.556132		+
Q7N9G3	plu0373	30.4781	30.1354	30.4339	30.9882	31.5483	31.0523	0.555891		+
Q7N3W1	gloA	26.5571	-	26.0282	26.975	26.7186	27.7416	0.553854
Q7N0K4	cyoD	28.1251	26.7903	27.616	-	-	28.3644	0.553274
Q7N9B9	fkpA	30.804	30.5103	30.3623	31.6249	31.5628	31.051	0.553254		+
Q7N5P4	plu1902	27.4741	27.1029	27.5815	28.3171	28.0277	28.3766	0.55313		+
Q7MYD3	plu4748	27.6642	-	-	28.7707	28.8117	27.9784	0.552472
Q7N634	plu1738	-	25.2739	-	25.8518	26.5499	25.9929	0.55187
Q7N9Q7	plu0257	28.5793	28.4076	-	28.8048	29.0997	30.1504	0.55165
Q7N6Y0	glk	26.4087	26.3079	26.8682	26.6606	27.8168	27.6851	0.55124
Q7N385	fabD	29.9293	29.5862	29.6286	30.4945	30.5007	30.7448	0.548945		+
Q7N0P6	hemH	26.4129	25.7563	26.1575	26.9851	27.1172	26.8293	0.547786		+
Q7N7E9	nqrF	-	-	24.585	25.7838	-	25.1246	0.547433
Q7N9P6	plu0269	26.5048	26.4395	26.2179	27.1563	27.5212	27.0928	0.547387		+
Q7N0S9	atoA	25.4758	-	26.368	-	-	26.7945	0.546156
Q7N518	plu2142	25.7053	25.5158	24.9893	26.2912	26.4875	26.0598	0.544861		+
Q7N1C5	dsbC	27.9014	27.3541	27.6542	28.7826	28.3239	28.4328	0.544672		+
Q7N769	cspE	32.8711	32.2621	32.7412	33.3775	33.801	33.3325	0.543806		+
Q7MYD8	argG	31.6686	31.4171	31.5605	32.5356	32.3372	32.4159	0.543074		+
Q7M7E0	plu1129	-	-	26.5284	-	-	27.4194	0.539251
Q7N571	ghrA	30.0475	29.9962	30.4332	31.14	31.2477	30.7752	0.537622		+
Q7N086	elbB	28.4852	28.6554	28.141	29.6097	29.3021	29.0779	0.534881		+
Q7N098	plu3995	-	-	25.6185	-	-	26.5229	0.534284
Q7N861	plu0884	28.1546	28.691	28.3357	29.2254	29.5732	29.1073	0.532837		+
Q7MYD9	argH	29.5223	29.779	29.9193	30.3766	30.7587	30.8153	0.532183		+
Q7MYV5	plu4563	30.5444	30.7176	30.5169	31.4906	31.1868	31.8362	0.531611		+
Q7N5D7	plu2016	30.5908	30.0825	30.517	30.9498	31.4181	31.5612	0.531102		+
Q7N2H1	astE	-	-	25.2254	25.6525	-	26.6308	0.529885
Q7N6I9	plu1561	32.2261	32.1979	31.4542	33.1029	33.0849	32.4474	0.528866
Q7N9X9	plu0172	27.5156	26.8365	26.8894	28.1905	27.8647	27.964	0.526363		+
Q7N0L9	plu3863	28.8627	27.7976	27.8919	28.6776	29.4294	29.2378	0.524544
Q7NA77	rbsB	27.8893	27.7046	27.6292	28.3334	28.9742	28.7144	0.523783		+
Q7N9R8	plu0246	31.0816	31.498	30.7641	32.1246	32.1981	31.8485	0.520329		+
Q7MYQ7	plu4618	26.1405	26.2029	25.6751	27.0492	27.2237	26.5891	0.518418		+
Q7N5A8	plu2048	27.0263	26.9639	26.9022	28.0512	27.7775	27.9111	0.517942		+
Q7N7W5	hpcD	28.082	28.3464	28.3632	28.8772	29.225	29.5501	0.516347		+
Q7N4K6	plu2325	29.2972	29.5739	29.2477	30.3203	30.4055	30.2588	0.515732		+
Q7N0R9	plu3812	27.3291	27.0538	27.275	28.2097	27.9654	28.371	0.513092		+
Q7N4S9	plu2238	26.794	27.7181	28.8681	28.6152	28.51	29.1507	0.512199
Q7MYK6	plu4671	26.3303	27.0278	26.2613	27.5645	-	27.4532	0.51084
Q7MYD6	argC	26.5138	-	26.5097	27.8213	-	27.1423	0.510492
Q7N2T1	cbiF	29.018	28.3869	29.2813	29.7062	29.7278	30.1624	0.510481		+
Q7MYW1	msrA	26.338	27.1358	26.9745	27.8198	27.7387	27.8322	0.506706		+
Q7N6H4	cipA	30.7731	31.8426	31.44	31.9417	32.7449	32.3712	0.499745
Q7N9H1	plu0365	-	-	24.6521	25.543	-	25.7628	0.499709
Q7NA21	plu0126	25.392	25.2158	25.8922	26.5262	26.2715	26.7519	0.494292		+
Q7MZL0	plu4273	26.1931	25.9243	26.1202	27.2809	26.7901	27.251	0.490353		+
Q7MZI3	plu4304	26.4658	26.603	26.3259	28.1801	27.7316	26.5908	0.487703
Q7MZC3	plu4369	-	25.9027	26.5754	26.7425	27.4652	27.6234	0.486997
Q7N0G8	plu3921	26.6506	26.3471	26.2187	27.0621	27.4656	27.8038	0.48689		+
Q7MZN8	ppxB	26.2807	24.7388	26.3797	27.1455	26.7601	26.6555	0.481628
Q7N6S8	plu1463	25.7775	25.9638	25.281	26.9507	26.8485	26.3911	0.480964		+
Q7MYW8	argR	30.21	29.626	29.1145	30.8495	30.7293	30.5732	0.477264		+
Q7MYD7	argB	28.9725	29.7912	29.1426	30.2736	30.5239	30.3221	0.475946		+
Q7N2X0	plu2953	-	-	25.9768	27.3947	-	26.7113	0.474268
Q7N024	plu4079	24.839	24.5132	-	25.8506	26.092	25.3383	0.471651		+
Q7N564	plu2093	27.5286	27.5603	27.3217	28.482	28.707	28.5924	0.458946		+
Q7N0I0	ggt	29.8306	29.7117	29.4251	30.7596	30.9139	30.6714	0.458233		+
Q7MYV2	plu4566	31.7226	31.9297	31.5266	32.8654	32.8929	32.8203	0.4559		+
Q7N7W2	hpaG2	27.8927	27.9086	27.6833	28.8088	29.299	28.8186	0.451485		+
Q7N2V6	plu2968	28.5135	27.4214	27.7852	29.3393	28.7748	29.0704	0.449127		+
Q7N2K8	katE	32.4397	32.4943	33.257	33.6199	34.2339	33.8534	0.443781		+
Q7N371	dld	26.5231	26.947	26.8281	28.0029	27.9017	27.9278	0.441933		+
Q7N2T3	cbiH	29.0561	-	29.4035	30.5863	30.2543	30.4248	0.437699		+
Q7N740	plu1322	25.2834	25.2761	25.4121	25.3903	26.9567	27.2021	0.437542
Q7N3N1	plu2684	-	26.7542	-	28.0267	-	27.8917	0.433769
Q7N561	plu2096	28.6894	28.205	-	29.8461	29.4623	-	0.43318
Q7MZU8	plu4176	27.8437	28.5625	27.0975	28.8419	29.2529	-	0.431416
Q7N9N7	plu0280	29.6279	29.5368	29.4824	30.9724	30.5704	30.781	0.427631		+
Q7N0Q3	ushA	28.77	28.7486	28.2995	29.9806	29.6695	29.8513	0.426986		+
Q7MYR8	plu4605	25.8035	26.226	26.1598	27.0881	27.3956	27.4176	0.42416		+
Q7MYS0	plu4603	-	25.5286	24.6893	25.944	26.1652	26.9353	0.423604
Q7N2S5	cbiA	27.0472	27.1272	26.7728	28.3646	28.0474	28.2675	0.422169		+
Q7MB81	plu0762	-	25.3386	24.7088	26.2822	26.0601	26.512	0.417243		+
Q7N500	plu2160	25.6094	-	26.1633	26.8661	27.4293	27.1497	0.416965		+
Q7N065	plu4031	27.2989	-	27.4843	28.853	28.6643	28.4447	0.416858		+
Q7MZY7	glpQ	30.1951	29.9447	30.1944	31.3322	31.5675	31.227	0.416329		+
Q7MZC2	plu4370	28.1236	28.4377	27.9576	29.4945	29.4718	29.3457	0.416287		+
Q7N5U4	plu1840	31.8945	31.9995	32.0019	33.1341	33.3979	33.1679	0.41524		+
Q7N2P0	plu3036	26.0014	26.821	25.8409	26.865	27.5749	28.0687	0.411298
Q7N3W4	anmK	28.7724	28.6582	26.6342	29.0986	29.5095	29.3277	0.408869
Q7MYS3	plu4600	26.268	26.705	26.8955	27.0123	27.9751	28.815	0.402953
Q7N9W8	plu0192	26.4891	26.219	26.5262	27.7426	27.6183	27.863	0.397804		+
Q7N814	plu0935	-	-	24.4011	-	-	25.7341	0.396925
Q7N9F5	dsbA	29.1972	29.2031	28.6208	30.1746	30.7654	30.2383	0.382699		+
Q7N8T2	plu0635	24.7964	25.0027	25.3217	26.3944	26.4354	26.5447	0.374261		+
Q7MYV3	plu4565	33.0037	33.2064	32.5427	34.3134	34.2092	34.5557	0.368099		+
Q7N9E8	ppiA	25.1598	25.4722	-	26.1489	28.0022	26.1586	0.365041
Q7N7D8	plu1212	25.1145	-	25.8274	27.0459	27.0304	26.7358	0.361872		+
Q7N3D8	plu2779	29.3161	28.8928	29.2783	30.6341	30.6982	30.5923	0.358711		+
Q7N8S4	argA	25.3502	-	25.9033	27.3029	26.5773	27.4822	0.354999		+
Q7N0T6	plu3793	-	26.9602	26.6358	28.5456	27.9071	28.433	0.354228		+
Q7MZP7	plu4231	25.635	25.3911	25.4776	27.7004	26.917	26.3923	0.353068		+
Q7MBH3	chb	29.3813	29.096	29.6087	31.051	30.6574	30.8868	0.352809		+
Q7N3G0	celF	27.9745	28.3846	27.9089	29.8914	29.4947	29.4892	0.344886		+
Q7MB48	plu1732	-	26.4298	26.0978	27.516	28.3578	27.5264	0.344766		+
Q7N0C6	plu3965	24.6213	24.6713	-	-	26.1918	-	0.34257
Q7N9U2	plu0219	28.487	28.1839	28.0298	29.7558	30.0634	29.5784	0.337828		+
Q7N3K0	ptrB	26.6697	25.833	26.9797	28.0079	27.8057	28.4008	0.335092		+
Q7N6R5	modA	25.5162	-	-	27.1717	27.2398	26.923	0.330954
Q7N9M2	dppA	28.045	27.6526	27.8654	29.1893	29.8314	29.3318	0.330675		+
Q7N3S4	plu2639	27.0809	-	-	28.3699	28.9168	28.9333	0.316641
Q7MZX7	plu4132	27.6172	27.9507	26.9717	-	29.197	-	0.31127
Q7N3L7	manY	25.6433	-	-	27.8946	27.127	27.1114	0.300551
Q7N6H5	plu1575	27.2038	27.7918	27.2981	28.4366	29.8312	29.2956	0.295956		+
Q7N9Q6	plu0258	-	-	25.2053	-	-	26.9651	0.295283
Q7N816	plu0932	-	25.866	25.7742	27.4147	27.7602	27.5673	0.295122	+	+
Q7N639	plu1731	26.4658	25.6549	26.761	28.1445	28.0583	28.1512	0.282421	+	+
Q7N461	oppA2	31.1586	30.6954	30.4342	32.739	32.6714	32.6101	0.265948	+	+
Q7N1E4	plu3532	26.7917	27.2799	26.253	-	-	28.6975	0.263769
Q7N9K6	plu0318	30.2093	30.1939	30.538	32.3902	32.055	32.3779	0.256911	+	+
Q7N5L9	plu1929	25.5356	26.6811	26.3668	28.1319	28.4278	27.9452	0.254579	+	+
Q7MZ18	argI	29.5225	29.4193	29.709	31.5632	31.4352	31.6103	0.252454	+	+
Q7N844	plu0903	25.2615	-	26.156	27.8335	-	27.7202	0.238479	+	+
Q7N460	oppA1	27.1986	27.0748	26.6047	28.9466	29.362	29.0188	0.225349	+	+
Q7N9E5	argD	27.5494	26.807	26.8647	29.319	29.2369	29.152	0.223403	+	+
Q7MAX5	ppc	34.8278	32.4175	31.4848	34.8133	34.6606	35.8594	0.217474
Q7N9U7	pstS	25.8912	-	25.2852	27.9947	27.5579	27.9317	0.211699	+	+
Q7N6G3	artI	25.0882	25.1944	-	27.873	27.677	26.7225	0.205494	+	+
Q7MB18	lsrB	25.9402	26.2627	-	28.5183	28.559	28.1912	0.200076	+	+
Q7N516	hslJ	29.2862	28.5707	28.1216	31.2834	30.8544	30.876	0.196811	+	+
Q7N7H4	plu1175	-	25.6749	26.3742	28.7414	27.9933	28.3975	0.195763	+	+
Q7MZV2	plu4172	24.6179	24.7792	-	27.0628	27.1063	27.1021	0.190536	+	+
Q7N8U8	tbpA	25.921	25.082	25.5328	27.7247	28.8634	28.1915	0.148864	+	+
Q7N368	plu2853	30.246	30.0767	29.7094	32.8578	32.8658	32.8236	0.139824	+	+
Q7N7H5	plu1174	29.3841	28.6889	28.8202	32.0192	32.0645	31.4498	0.135834	+	+
Q7N3M7	plu2688	27.0122	-	26.18	29.6668	29.0646	29.8649	0.130669	+	+
Q7N751	gltI	27.0165	25.4445	25.7259	30.0249	27.9225	29.2704	0.124111	+	+
Q7N895	plu0840	26.9583	26.7491	27.0226	30.1944	30.1282	30.0594	0.107519	+	+
P60013	zapD	24.9889	-	-	-	-	-	-
Q7M7H7	rnpA	-	-	23.536	-	-	-	-
Q7MAZ9	cca	-	-	24.7659	-	-	-	-
Q7MB64	trmD	-	-	-	-	-	22.9101	-
Q7MY26	slmA	-	22.9867	-	-	-	-	-
Q7MYU8	priB	22.2802	-	-	-	-	-	-
Q7MZB5	ubiC	-	27.9712	-	-	-	-	-
Q7MZB6	ubiA	-	-	-	-	-	24.1179	-
Q7MZX2	dsbD	25.079	-	-	-	-	-	-
Q7N0A2	sstT	-	-	-	24.9732	-	24.1683	-
Q7N0I3	queA	-	23.9382	-	-	-	-	-
Q7N0K3	cyoE	-	-	-	-	-	22.4906	-
Q7N0S3	lpxH	-	-	-	23.487	24.2566	-	-
Q7N124	mutH	-	-	-	-	-	21.2761	-
Q7N157	yacG	-	25.2118	-	-	-	-	-
Q7N1G0	norM	-	-	-	-	-	22.4702	-
Q7N1U6	nadK	-	-	-	-	24.7421	-	-
Q7N2A3	mnmC	-	-	-	21.0124	-	-	-
Q7N2I7	nuoA	-	-	-	24.8018	25.372	-	-
Q7N2S6	cobD	-	-	26.217	-	-	-	-
Q7N391	tmk	-	-	-	25.1679	-	-	-
Q7N3D3	pagP	-	-	-	-	22.187	-	-
Q7N3S7	hmuV	-	-	-	-	-	24.86	-
Q7N3Z4	nhaB	-	-	-	-	-	25.3826	-
Q7N4X5	psuG1	-	-	-	24.0139	-	-	-
Q7N555	cmoA	-	24.4692	24.1878	-	-	-	-
Q7N562	plu2095	-	-	-	-	26.0923	26.7813	-
Q7N5C8	pgsA	-	-	-	25.7909	-	-	-
Q7N5W3	plu1816	-	-	-	-	23.431	-	-
Q7N621	pncB	-	-	23.6329	-	-	-	-
Q7N6B9	mukF	-	-	-	24.4443	-	-	-
Q7N6E9	lolA	-	-	-	26.8327	26.5846	26.6376	-
Q7N6J3	dcd	-	-	-	28.5874	-	27.2539	-
Q7N6P6	moaA	-	-	23.134	-	-	-	-
Q7N6Q7	bioB	-	-	-	-	24.2479	-	-
Q7N6Z2	cysA	-	-	24.863	-	-	-	-
Q7N6Z8	plu1384	-	-	-	25.9689	-	-	-
Q7N6Z9	hemF	-	-	-	-	-	25.4651	-
Q7N760	rlmH	-	-	-	24.4791	-	-	-
Q7N765	plu1293	-	25.0276	-	-	-	-	-
Q7N7A9	aas	-	-	24.7043	-	-	-	-
Q7N7G7	yqgF	-	-	-	-	-	22.8432	-
Q7N7H9	trmB	-	-	-	-	-	23.9085	-
Q7N839	rlmD	-	-	23.8318	-	-	-	-
Q7N871	panD	-	-	-	26.5117	-	-	-
Q7N892	speE	-	-	-	-	-	23.4638	-
Q7N8M1	gmhB1	-	-	24.845	-	-	-	-
Q7N8N3	rnhB	-	24.1107	24.5161	-	-	-	-
Q7N8P2	uppS	-	-	-	-	-	26.1807	-
Q7N8U5	lgt	-	-	-	22.5481	-	-	-
Q7N8V0	thiQ	-	23.1201	-	-	-	-	-
Q7N8V3	djlA	-	-	25.212	-	-	-	-
Q7N8V9	apaH	-	-	-	-	-	24.4568	-
Q7N8Z5	thrB	-	-	-	26.3678	-	25.5847	-
Q7N987	lamB	-	-	24.4951	-	-	-	-
Q7N9B6	tusC	-	-	25.4437	-	-	-	-
Q7N9W3	glpE	-	-	-	-	-	24.7582	-
Q7NA81	ravA	-	-	-	23.0687	-	-	-
F5HC69	cpmE	-	-	-	-	-	25.81	-
F5HDR0	cpmJ	-	-	-	-	-	23.4535	-
Q7M7D8	plu1904	-	-	24.6511	-	-	-	-
Q7MAX4	plu4778	-	-	-	-	-	23.6498	-
Q7MAZ5	plu4160	-	-	23.8136	-	-	-	-
Q7MB05	mutT	23.805	-	-	-	-	-	-
Q7MB09	plu3296	-	-	-	-	-	23.572	-
Q7MB23	plu2796	25.1513	23.8763	24.0469	-	-	-	-
Q7MB34	plu2249	-	-	-	25.5074	-	-	-
Q7MB37	plu2239	-	-	-	-	-	22.4648	-
Q7MB38	plu2222	24.7533	24.7802	25.4813	-	-	-	-
Q7MB49	plu1722	25.5009	25.8308	-	-	-	-	-
Q7MB52	plu1681	-	22.0588	-	-	-	-	-
Q7MB76	plu0818	-	-	-	-	21.8288	-	-
Q7MB84	miaE	-	-	22.8841	-	-	-	-
Q7MBA1	plu0283	-	-	-	-	22.7057	-	-
Q7MBH0	hemD	-	-	27.074	-	-	-	-
Q7MXZ9	hipA	-	-	-	-	21.6062	-	-
Q7MY00	plu4899	25.9769	-	-	-	-	-	-
Q7MY23	plu4873	-	25.8663	-	-	-	-	-
Q7MY34	walM	23.2755	-	-	-	-	-	-
Q7MY42	walW	-	-	-	-	-	25.8429	-
Q7MY43	walV	-	-	24.0289	-	-	-	-
Q7MY50	plu4842	-	-	-	-	23.9862	-	-
Q7MY64	wblY	-	-	-	-	-	24.4699	-
Q7MY65	wblX	-	-	-	25.1598	-	-	-
Q7MY70	wblS	-	-	-	24.0805	24.388	24.0824	-
Q7MY75	wblQ	-	-	25.2294	-	-	-	-
Q7MY77	wblO	-	-	-	-	-	25.8638	-
Q7MY87	wblE	-	24.649	23.3999	-	-	-	-
Q7MY90	wblC	-	-	-	-	-	25.7889	-
Q7MY93	cpxA	-	-	23.4656	-	-	-	-
Q7MY95	cpxP	-	-	26.5207	-	-	-	-
Q7MYA0	plu4788	-	-	28.6909	-	-	-	-
Q7MYA4	plu4782	25.8595	-	-	-	-	-	-
Q7MYA7	plu4779	-	-	-	-	-	24.3014	-
Q7MYE2	plu4737	-	-	-	-	-	22.874	-
Q7MYE6	birA	24.6079	24.6814	-	-	-	-	-
Q7MYJ2	ilvG	-	-	-	-	-	20.1502	-
Q7MYJ8	plu4679	-	-	24.2151	-	-	-	-
Q7MYK1	plu4676	-	-	24.2534	-	-	-	-
Q7MYK5	plu4672	24.5374	-	25.5894	-	-	-	-
Q7MYL0	rep	-	-	-	23.5205	-	-	-
Q7MYL7	wecB	-	-	-	25.4906	-	-	-
Q7MYN6	plu4639	-	-	-	-	-	23.1462	-
Q7MYN7	xerC	-	-	23.7078	-	-	-	-
Q7MYN8	plu4637	-	25.3832	-	-	-	-	-
Q7MYS9	plu4594	-	-	-	-	-	23.7512	-
Q7MYX9	plu4537	-	-	-	-	-	28.0809	-
Q7MYZ9	plu4512	-	25.7626	-	-	-	-	-
Q7MZ12	nrdD	-	-	-	-	-	21.7645	-
Q7MZ22	plu4486	24.9513	25.5154	-	-	-	-	-
Q7MZ30	ampH	22.3755	-	-	-	-	-	-
Q7MZ31	plu4477	-	23.6805	-	-	-	-	-
Q7MZ62	plu4436	-	-	-	24.8962	24.9951	-	-
Q7MZ72	plu4422	-	-	-	-	-	22.2292	-
Q7MZ82	plu4412	25.8971	-	-	-	-	-	-
Q7MZA1	plu4393	23.7558	24.5287	-	-	-	-	-
Q7MZA9	dltA	-	-	24.2859	-	-	-	-
Q7MZC4	plu4368	-	-	-	24.5213	-	-	-
Q7MZD3	dnaB	-	25.556	-	-	-	-	-
Q7MZD7	plu4355	-	-	-	22.6695	-	-	-
Q7MZF2	crtE	-	-	-	24.6106	24.9108	24.5972	-
Q7MZK2	plu4283	24.3698	-	-	-	-	-	-
Q7MZM2	plu4261	25.8494	-	25.0718	-	-	-	-
Q7MZN5	plu4247	-	-	-	-	22.0663	-	-
Q7MZS9	plu4195	26.988	26.9047	26.7242	-	-	-	-
Q7MZT9	plu4185	-	-	24.3851	-	-	-	-
Q7MZU5	plu4179	-	22.8339	-	-	-	-	-
Q7MZY1	frdD	-	-	-	-	-	26.9397	-
Q7N025	plu4078	-	-	-	-	-	24.8731	-
Q7N037	plu4066	-	-	23.0651	-	-	-	-
Q7N074	degS	-	-	-	-	-	23.478	-
Q7N094	plu3999	-	-	24.5574	-	-	-	-
Q7N096	plu3997	-	-	23.77	-	-	-	-
Q7N0C1	plu3970	-	-	-	23.7118	-	-	-
Q7N0C5	plu3966	-	-	-	25.9293	26.5508	25.9732	-
Q7N0E2	plsC	25.1241	-	-	-	-	-	-
Q7N0E5	plu3945	-	-	-	22.405	-	-	-
Q7N0H3	plu3915	-	-	24.0786	-	-	-	-
Q7N0I4	yajC	-	-	29.9001	-	-	-	-
Q7N0J3	plu3894	-	-	-	-	-	25.3719	-
Q7N0J5	plu3889	-	-	-	24.9756	-	-	-
Q7N0K0	apbA	-	-	-	-	-	22.1335	-
Q7N0K2	plu3880	-	-	-	25.8974	-	-	-
Q7N0K5	cyoC	-	-	-	-	-	25.6198	-
Q7N0L8	plu3864	-	-	-	22.731	-	-	-
Q7N0M4	mdlB	-	-	-	-	-	20.4432	-
Q7N0M8	plu3854	-	-	-	-	-	26.4014	-
Q7N0Q2	fsr	-	21.9935	-	-	-	-	-
Q7N0R2	plu3819	-	-	-	-	-	21.8611	-
Q7N0R3	tesA	-	-	-	-	-	22.6783	-
Q7N0X4	plu3755	-	-	-	-	-	22.8022	-
Q7N0Z7	plu3732	-	-	-	-	-	21.2391	-
Q7N0Z8	plu3731	-	23.3753	-	-	-	-	-
Q7N191	plu3604	-	-	-	-	-	20.7535	-
Q7N1B6	plu3562	24.1367	23.8789	-	-	-	-	-
Q7N1C4	xerD	-	-	-	-	20.7189	-	-
Q7N1D6	prpD	-	25.0795	-	-	-	-	-
Q7N1D8	plu3538	26.7881	26.9701	27.2437	-	-	-	-
Q7N1D9	plu3537	25.3068	-	25.2063	-	-	-	-
Q7N1E1	plu3535	24.4269	-	-	-	-	-	-
Q7N1E2	plu3534	24.5905	24.2611	24.6306	-	-	-	-
Q7N1E8	plu3528	-	-	25.8494	-	-	-	-
Q7N1F0	plu3526	-	23.5628	-	-	-	-	-
Q7N1Y8	plu3326	25.5946	-	26.1627	-	-	-	-
Q7N1Z8	plu3313	-	-	-	-	-	22.0338	-
Q7N208	plu3301	-	-	26.698	-	-	-	-
Q7N233	plu3274	-	-	-	-	20.9064	-	-
Q7N239	plu3263	-	-	-	-	-	20.7666	-
Q7N276	plu3215	-	-	-	22.4308	-	-	-
Q7N279	plu3212	26.1802	-	-	-	-	-	-
Q7N2A2	plu3186	-	-	-	-	-	26.4971	-
Q7N2B7	dedD	-	-	25.4613	-	-	-	-
Q7N2H6	plu3101	23.9675	-	-	-	-	-	-
Q7N2J8	nuoM	25.0566	-	-	-	-	-	-
Q7N2L0	plu3066	-	-	-	-	-	25.7782	-
Q7N2L6	plu3060	-	-	-	-	-	24.064	-
Q7N2L9	vapC	-	-	-	-	24.5406	24.1574	-
Q7N2N0	plu3046	-	-	-	19.8538	-	-	-
Q7N2N9	plu3037	-	-	-	-	22.445	-	-
Q7N2P1	plu3035	-	-	-	-	-	25.1543	-
Q7N2Q1	plu3025	-	-	-	-	24.7928	24.6064	-
Q7N2X2	plu2951	-	-	24.6006	-	-	-	-
Q7N2X3	plu2950	-	-	-	-	-	23.5049	-
Q7N350	plu2872	-	-	-	-	24.6442	-	-
Q7N353	plu2868	24.7627	-	-	-	-	-	-
Q7N356	plu2865	-	-	25.8216	-	-	-	-
Q7N363	fruK	-	-	-	23.0428	-	-	-
Q7N367	lysP	-	-	-	-	-	24.433	-
Q7N3A3	plu2816	28.6105	28.0494	28.5104	-	-	-	-
Q7N3A7	lolE	-	-	-	-	-	23.8564	-
Q7N3C2	plu2795	24.8333	26.1101	-	-	-	-	-
Q7N3C4	plu2793	27.8358	-	26.3961	-	-	-	-
Q7N3C5	plu2792	-	-	24.7197	-	-	-	-
Q7N3D0	plu2787	-	-	24.8202	-	-	-	-
Q7N3E0	baeS	-	-	-	-	-	22.4552	-
Q7N3F3	ppx	24.2705	-	-	-	-	-	-
Q7N3G1	celC	-	-	-	-	-	24.9326	-
Q7N3H8	plu2738	-	-	-	-	-	23.3838	-
Q7N3I2	plu2734	-	-	-	-	-	22.2323	-
Q7N3M1	pabB	-	-	-	-	-	22.0676	-
Q7N3M5	holE	-	-	-	-	-	24.2569	-
Q7N3M9	plu2686	-	-	-	29.2025	-	-	-
Q7N3N5	plu2680	27.7501	27.9086	-	-	-	-	-
Q7N3P3	yfeA	-	-	-	26.3951	26.5329	26.1312	-
Q7N3S1	plu2642	24.0056	-	-	-	-	-	-
Q7N3S8	plu2635	-	-	-	-	-	23.3806	-
Q7N3U4	sufD	-	-	-	-	-	23.8197	-
Q7N3V6	plu2607	-	-	-	21.8244	-	-	-
Q7N3X6	pspF	-	-	22.7581	-	-	-	-
Q7N402	pncA	23.9053	-	-	-	-	-	-
Q7N418	plu2537	-	22.5099	-	-	-	-	-
Q7N447	plu2507	-	-	25.1161	-	-	-	-
Q7N453	galU	-	-	26.1531	-	-	-	-
Q7N455	plu2499	-	-	23.4064	-	-	-	-
Q7N491	plu2461	-	-	-	24.5047	-	-	-
Q7N492	tccA2	-	-	-	23.9867	23.3876	-	-
Q7N495	trpH	24.3115	-	-	-	-	-	-
Q7N4B6	plu2433	-	-	26.9284	-	-	-	-
Q7N4C5	plu2423	-	-	22.8847	-	-	-	-
Q7N4C6	plu2422	-	-	-	-	-	20.3257	-
Q7N4D6	plu2405	25.3292	-	25.4849	-	-	-	-
Q7N4I0	plu2357	26.5975	-	26.6939	-	-	-	-
Q7N4L5	plu2316	25.6794	26.8611	26.8032	-	-	-	-
Q7N4L8	plu2309	-	-	-	-	-	21.651	-
Q7N4M6	plu2299	20.9314	-	-	-	-	-	-
Q7N4P3	ccdB	-	-	-	-	-	24.7356	-
Q7N4Q0	plu2272	-	-	23.276	-	-	-	-
Q7N4Q4	plu2268	-	-	-	-	-	23.3985	-
Q7N4Q7	plu2265	-	-	23.6121	-	-	-	-
Q7N4R0	plu2262	23.873	-	-	-	-	-	-
Q7N4U0	mlc	-	-	-	-	22.4537	-	-
Q7N512	plu2148	-	-	-	24.4939	24.4514	-	-
Q7N528	plu2132	-	-	25.1483	-	-	-	-
Q7N529	plu2131	-	23.9758	-	-	-	-	-
Q7N531	plu2129	-	22.8033	-	-	-	-	-
Q7N558	plu2099	23.8547	-	-	-	-	-	-
Q7N559	plu2098	-	-	-	23.7103	-	-	-
Q7N567	rimJ	-	-	-	-	-	23.3603	-
Q7N582	plu2074	-	21.1254	-	-	-	-	-
Q7N5B4	plu2041	-	-	-	20.6296	-	-	-
Q7N5B8	plu2036	-	-	-	27.6175	-	24.5548	-
Q7N5D0	plu2024	-	-	-	25.8335	-	-	-
Q7N5D2	plu2022	-	-	-	27.6102	27.2966	27.2034	-
Q7N5G4	plu1987	-	-	-	24.9372	-	-	-
Q7N5H6	plu1973	24.9827	-	-	-	-	-	-
Q7N5I0	dsdX	25.1376	-	-	-	-	-	-
Q7N5I1	dsdC	-	23.4414	-	-	-	-	-
Q7N5J5	fliD	24.8115	-	26.3447	-	-	-	-
Q7N5K0	fliF	-	-	-	-	24.8246	-	-
Q7N5K7	fliM	-	-	-	-	-	23.6427	-
Q7N5L6	plu1932	-	-	-	-	21.5305	-	-
Q7N5M2	plu1926	-	-	-	-	-	24.7759	-
Q7N5M4	flgK	25.1296	25.1166	25.2243	-	-	-	-
Q7N5T0	cheY	-	-	-	-	-	24.9875	-
Q7N5T3	plu1854	-	-	24.9409	-	-	-	-
Q7N5T5	cheW	25.1919	-	-	-	-	-	-
Q7N5T6	cheA	-	-	24.4072	-	-	-	-
Q7N5V9	plu1821	-	-	25.7363	-	-	-	-
Q7N5W4	dinI	-	-	-	-	-	23.8632	-
Q7N5W5	htrB	-	-	-	23.3836	-	-	-
Q7N5Y8	plu1791	-	-	-	-	26.0268	-	-
Q7N5Z8	helD	-	24.2702	-	-	-	-	-
Q7N613	plu1763	-	23.9664	-	-	-	-	-
Q7N632	plu1740	-	-	-	-	21.6535	-	-
Q7N633	plu1739	-	-	-	-	-	23.414	-
Q7N644	plu1726	-	23.5207	-	-	-	-	-
Q7N645	plu1725	-	-	26.0304	-	-	-	-
Q7N648	plu1721	-	-	23.8191	-	-	-	-
Q7N650	plu1719	26.5891	26.1511	25.9957	-	-	-	-
Q7N652	plu1717	-	25.437	-	-	-	-	-
Q7N656	plu1712	26.2999	26.2073	-	-	-	-	-
Q7N660	plu1707	25.5641	26.2091	25.5585	-	-	-	-
Q7N661	plu1706	24.9248	25.0248	-	-	-	-	-
Q7N691	plu1671	-	-	24.1069	-	-	-	-
Q7N695	plu1666	-	24.8767	-	-	-	-	-
Q7N6D1	plu1625	23.8123	-	-	-	-	-	-
Q7N6E4	plu1611	-	-	-	-	-	25.4884	-
Q7N6F4	cydC	-	-	-	-	-	23.0439	-
Q7N6G4	artQ	-	-	21.8494	-	-	-	-
Q7N6H3	plu1577	-	-	-	-	-	25.0349	-
Q7N6H8	plu1572	-	-	-	24.8226	-	-	-
Q7N6L1	moeB	-	-	-	23.2607	-	-	-
Q7N6M8	plu1518	-	-	-	27.1446	26.1694	27.6619	-
Q7N6M9	plu1517	-	-	-	26.4279	26.9757	-	-
Q7N6N1	plu1515	-	-	-	-	-	22.0951	-
Q7N6P7	plu1498	23.8024	-	-	-	-	-	-
Q7N6Q3	plu1489	-	-	-	24.4622	24.6282	-	-
Q7N6S7	plu1464	26.7027	26.3873	-	-	-	-	-
Q7N6S9	plu1462	-	-	-	28.2999	28.289	-	-
Q7N6T7	tolA	-	24.9283	-	-	-	-	-
Q7N6U3	plu1446	-	-	-	-	-	27.2807	-
Q7N6V0	plu1438	-	-	22.597	-	-	-	-
Q7N6W1	sdhC	-	-	-	-	-	24.5346	-
Q7N6Y4	nupC	-	23.2641	-	-	-	-	-
Q7N701	plu1381	-	-	-	26.2487	24.5135	-	-
Q7N734	plu1329	-	21.9744	-	-	-	-	-
Q7N761	pbpA	-	-	-	-	-	24.3281	-
Q7N783	emrB	-	22.0941	-	-	-	-	-
Q7N7D5	plu1215	-	-	25.1156	-	-	-	-
Q7N7E5	plu1205	-	-	-	-	-	21.0556	-
Q7N7F8	plu1192	-	-	-	-	-	25.23	-
[truncated: 64 more rows]
