# Supplementary material for: Genome mining unearths a hybrid nonribosomal peptide synthetase-like-pteridine synthase biosynthetic gene cluster
Source: eLife journal article supplement (doi:10.7554/elife.25229), 2017-03-15
Supplement: supp [file Supplementary File 1A.xlsx]

## Sheet: Sheet1
			Abundance
m/z	Z	Ret. time (min)	WT	Δ2793		Δ2794		Δ2795		Δ2796		Δ2797		Δ2798		Δ2799
85.0281	1	7.66342	400331	1		510511	(5)	406014	(5)	1		424232	(5)	189303	(5)	304060	(5)
127.039	1	10.2361	747945	1		876800	(5)	420122	(5)	445924	(4)	540850	(5)	431688	(2)	710350	(4)
133.049	1	9.78024	444028	1		458139	(5)	436279	(5)	375021	(5)	386211	(5)	263037	(3)	306065	(5)
137.112	2	12.4899	1.27942e+06	1.1366e+06	(5)	1.05355e+06	(5)	1695198	(5)	1		1.18442e+06	(5)	1.29231e+06	(5)	1.30992e+06	(5)
143.016	1	9.77952	280633	1		273880	(5)	256321	(5)	1		1		1		1
153.064	1	5.38311	893744	1		854906	(5)	904708	(5)	1.03977e+06	(5)	750943	(5)	727411	(5)	864321	(5)
155.045	1	5.72389	2.91185e+06	1		2.2965e+06	(5)	2785972	(5)	2.61812e+06	(5)	1.48019e+06	(5)	2.20229e+06	(5)	4.35046e+06	(5)
168.088	1	5.31341	1.28982e+06	1		1		1770945	(5)	1		427680	(4)	889164	(3)	3249688	(5)
170.067	1	3.51253	329570	1		328398	(3)	307623	(3)	397632	(5)	234173	(5)	275990	(3)	387212	(5)
176.057	1	7.20545	2.91358e+06	1		7.77619e+06	(5)	4.51523e+06	(5)	4.54796e+06	(5)	4.34452e+06	(5)	1660486	(1)	5568250	(5)
180.051	1	4.67649	1.68309e+06	1		2028681	(5)	2.20948e+06	(5)	1.88631e+06	(5)	2.00551e+06	(5)	2.25885e+06	(5)	4128385	(5)
182.067	1	3.79145	2992478	1		3.43745e+06	(5)	3.6914e+06	(5)	3.5707e+06	(4)	1.7529e+06	(5)	2785741	(4)	4.1848e+06	(5)
182.068	1	5.37806	6.29579e+06	1		6.66228e+06	(5)	6.63101e+06	(5)	7.97575e+06	(5)	5949388	(5)	5.96612e+06	(5)	7.83374e+06	(4)
185.063	1	9.78018	939750	479358	(5)	955469	(5)	910440	(4)	738258	(5)	763991	(5)	450462	(5)	595854	(4)
187.06	1	10.2337	595333	247927	(5)	639548	(5)	519258	(5)	377720	(5)	472380	(5)	1		299017	(5)
187.06	1	7.66682	582896	290778	(4)	718673	(5)	627110	(4)	394935	(5)	708935	(5)	359878	(5)	521918	(5)
194.067	1	6.3051	428132	1		896535	(5)	376841	(5)	385207	(5)	579918	(5)	1		350915	(5)
199.069	1	3.77066	1.4212e+06	1		1.00826e+06	(5)	1.15675e+06	(5)	1.74095e+06	(5)	719986	(5)	1333951	(5)	922687	(5)
199.069	1	3.99125	946064	1		599389	(4)	1.32838e+06	(3)	2.04847e+06	(4)	310110	(3)	973502	(3)	588310	(2)
203.073	1	9.77952	1.25234e+06	623031	(5)	1.34652e+06	(5)	1.1826e+06	(5)	992853	(5)	1.04188e+06	(5)	576608	(5)	846562	(5)
205.07	1	10.235	4.55301e+06	1.97951e+06	(5)	4.94019e+06	(5)	4.25975e+06	(5)	3.07672e+06	(5)	3631256	(5)	1764579	(5)	2.65968e+06	(5)
205.071	1	7.662	3.07885e+06	1.19419e+06	(5)	3.64387e+06	(5)	3.38544e+06	(4)	1.94613e+06	(5)	3.83091e+06	(5)	1.84975e+06	(3)	2.45947e+06	(4)
210.062	1	6.14896	524617	1		360452	(4)	300227	(4)	437613	(5)	1309009	(5)	1		539223	(5)
210.098	1	5.30109	3.24297e+07	1.51564e+06	(5)	1.67644e+06	(5)	47077860	(5)	1		12297340	(5)	2.61766e+07	(5)	92104072	(5)
214.057	1	5.38314	2.7142e+06	1		2.67497e+06	(5)	2.77757e+06	(5)	3.13871e+06	(5)	2.44975e+06	(5)	2.48895e+06	(5)	2766713	(5)
219.099	1	5.42726	444260	1		470233	(5)	464074	(5)	496442	(5)	309709	(5)	418699	(5)	549093	(5)
224.114	1	6.29032	1.52604e+06	1		1		1.67845e+06	(5)	1		760243	(5)	3.42867e+06	(5)	5.22545e+06	(5)
226.093	1	4.48503	1.70391e+07	414852	(5)	2.79141e+06	(5)	544840	(5)	1		1.31406e+07	(5)	1.32266e+07	(5)	3.65318e+07	(5)
226.093	1	5.29817	571742	1		1		615717	(5)	1		283555	(3)	343159	(5)	749834	(5)
226.093	1	4.27639	3.06228e+06	1		476036	(4)	1		1		2.00714e+06	(4)	1.4427e+06	(4)	5.84185e+06	(5)
230.088	1	4.79135	831641	1		705279	(5)	678483	(5)	711461	(5)	920840	(5)	630304	(4)	1.51156e+06	(4)
236.114	1	12.1713	1.26209e+06	1		1420433	(5)	1.82736e+06	(4)	1.10658e+06	(5)	1188633	(5)	1820071	(5)	2.99013e+06	(5)
236.114	1	11.1499	852102	1		791204	(4)	904680	(5)	742423	(4)	816445	(3)	954247	(5)	944525	(4)
238.093	1	8.38882	390439	1		482531	(5)	476980	(5)	590967	(5)	328950	(5)	403858	(3)	408911	(5)
254.103	1	11.5163	9.18507e+06	1		1.28089e+07	(5)	7903572	(5)	6.80486e+06	(5)	6094533	(5)	6377682	(5)	14474965	(5)
259.142	2	7.27324	4188280	1		3534217	(4)	5.1732e+06	(4)	4.67583e+06	(5)	4.99989e+06	(5)	5.04691e+06	(5)	4.70781e+06	(5)
263.094	1	8.1268	1.99382e+06	741445	(3)	2.18571e+06	(4)	1.9588e+06	(4)	1295526	(2)	1.8604e+06	(3)	964563	(3)	1055721	(3)
265.16	2	10.0022	3208557	1.48943e+06	(5)	5.60341e+06	(5)	3.97145e+06	(5)	4.96429e+06	(5)	905132	(2)	5.91099e+06	(5)	4633370	(5)
268.067	1	7.20783	510668	1		929986	(5)	551509	(5)	754356	(5)	588082	(5)	318757	(5)	590385	(5)
268.082	1	12.0433	1.15484e+07	1		1.52967e+07	(5)	1.31212e+07	(5)	1.15225e+07	(5)	1.09581e+07	(5)	1.5154e+07	(4)	2.46939e+07	(5)
268.083	1	11.2104	1.73696e+06	1		1.68109e+06	(5)	1.32359e+06	(5)	1.54494e+06	(5)	1.44141e+06	(5)	1.46469e+06	(5)	1708373	(5)
269.089	1	7.40489	729273	1		1.05103e+06	(5)	629671	(5)	948456	(5)	632287	(5)	624267	(5)	933059	(5)
270.098	1	9.64809	5.55336e+06	1		7.83926e+06	(5)	5.43881e+06	(5)	5.67704e+06	(5)	3.73962e+06	(5)	5.52022e+06	(5)	9.71539e+06	(5)
270.099	1	11.1855	4.19165e+06	1		5.53422e+06	(5)	3811652	(5)	3.87827e+06	(5)	2.74962e+06	(5)	4.94809e+06	(5)	9.04213e+06	(5)
270.109	1	9.10834	1.05676e+06	1		968472	(5)	1.11699e+06	(5)	998953	(5)	750189	(5)	827306	(5)	1.18404e+06	(5)
277.111	1	9.60779	671313	400342	(3)	566433	(3)	671781	(4)	772972	(4)	587318	(5)	482804	(5)	842021	(4)
279.099	1	11.9406	2.20728e+06	1		2.60933e+06	(4)	2.37642e+06	(5)	1822140	(5)	1.12465e+06	(5)	1		3.61608e+06	(4)
281.106	1	7.6619	8.40036e+06	2.20136e+06	(5)	8.06877e+06	(5)	7.75835e+06	(5)	4319298	(5)	7.33709e+06	(5)	3779945	(5)	3.66532e+06	(5)
285.192	2	7.99872	2276329	1		3.73961e+06	(5)	2104132	(4)	3.4998e+06	(5)	1		3.57807e+06	(4)	3.7067e+06	(5)
286.094	1	10.499	423741	1		494528	(5)	276571	(4)	340813	(4)	1		296133	(3)	625471	(5)
286.129	1	8.1835	557834	1		1		1.06006e+06	(5)	761766	(5)	444962	(5)	834098	(5)	1.23901e+06	(5)
286.178	1	5.38543	396617	1		392972	(2)	1		390996	(5)	387420	(3)	1		288675	(3)
287.195	1	13.4008	2.64706e+06	1.32598e+06	(4)	3.04829e+06	(4)	2.81567e+06	(5)	2373644	(4)	2.66049e+06	(5)	3.29231e+06	(5)	3.19146e+06	(5)
288.111	1	8.9721	784400	1		905468	(5)	746128	(3)	631518	(3)	655385	(4)	628110	(4)	1.61158e+06	(5)
291.172	1	6.73384	1.53297e+06	712576	(4)	1		1631012	(3)	1806868	(5)	2.063e+06	(5)	2.21365e+06	(5)	1638560	(4)
583.219	2	11.6358	662537	376552	(1)	546445	(5)	1		623186	(5)	567087	(5)	374994	(1)	475008	(3)
292.199	2	7.369	6.29674e+07	3.31455e+07	(5)	7.5084e+07	(5)	1.30945e+08	(5)	1		6.78735e+07	(5)	9.69772e+07	(5)	83389136	(5)
295.093	1	9.83443	2.0639e+06	1		3.05914e+06	(3)	1.72819e+06	(5)	2223379	(5)	1.54766e+06	(5)	1.33012e+06	(5)	2.59749e+06	(5)
295.162	2	6.7745	835400	1		837592	(5)	591078	(3)	957256	(4)	1086909	(3)	1148617	(4)	824292	(4)
295.163	1	7.49205	1.58937e+06	1		2.65857e+06	(2)	1000233	(1)	2165353	(1)	2.59762e+06	(4)	2.57543e+06	(3)	1
302.123	1	5.83921	1.11808e+06	1		1.35638e+06	(5)	1.16399e+06	(4)	1.1001e+06	(4)	681589	(3)	715992	(4)	2.18652e+06	(4)
302.124	1	7.02815	1.40918e+06	1		1.62291e+06	(5)	1.29078e+06	(4)	1263358	(5)	971376	(4)	1.22835e+06	(5)	2219328	(5)
302.126	1	7.44483	388172	1		497347	(3)	283852	(5)	338160	(4)	1		263733	(1)	678394	(5)
304.175	2	6.48013	965699	1		965049	(5)	785749	(5)	1.06844e+06	(5)	1.45184e+06	(5)	1353085	(5)	1
306.215	2	10.4613	1.02953e+06	476795	(3)	1.45496e+06	(3)	1.73502e+06	(4)	1		1.29341e+06	(5)	1.04839e+06	(5)	1.95076e+06	(5)
309.184	2	7.86697	667628	593229	(4)	1.02507e+06	(5)	1		812570	(5)	825131	(5)	378813	(2)	722973	(5)
311.146	1	7.67765	449668	1		642291	(5)	633167	(5)	489105	(5)	495780	(5)	639398	(4)	735143	(5)
318.109	1	13.0452	1471170	1		1.54902e+06	(4)	1833774	(3)	896407	(5)	714091	(5)	1.52724e+06	(5)	2.14673e+06	(5)
321.213	2	11.9806	1.7337e+06	1		1.34908e+06	(4)	1.10727e+06	(4)	1.72885e+06	(5)	2.08919e+06	(5)	369656	(4)	1
326.217	2	8.07678	3.92068e+07	15292127	(2)	1		4.32821e+07	(5)	5.48438e+07	(5)	5.98272e+07	(5)	7.01189e+07	(5)	3.79518e+07	(5)
327.096	1	10.0568	4.38615e+06	1		5.20538e+06	(5)	3707076	(5)	4.41872e+06	(5)	2.80715e+06	(5)	3.76901e+06	(5)	5.50876e+06	(5)
327.119	1	8.24429	420456	1		564990	(5)	473110	(5)	455288	(3)	491436	(5)	508991	(5)	432135	(3)
327.203	2	8.54652	4.43822e+06	1.19653e+06	(3)	1		3.23233e+06	(3)	5.11317e+06	(3)	6438589	(4)	5.43667e+06	(3)	5.62138e+06	(2)
328.103	1	10.0544	2.25038e+07	1		33458414	(5)	2.20919e+07	(5)	2.56157e+07	(5)	1.45176e+07	(5)	24248108	(5)	3.63285e+07	(5)
331.136	1	3.7877	353159	1		269619	(5)	365741	(5)	363589	(5)	423979	(5)	1		362941	(5)
335.148	1	11.3222	1.69194e+06	1		1.91578e+06	(5)	3.14159e+06	(5)	1		1.95296e+06	(4)	3.08444e+06	(4)	3.7034e+06	(4)
342.082	1	8.71083	1.7174e+06	1		3087186	(5)	3.25466e+06	(5)	2.68374e+06	(5)	3.42424e+06	(5)	4.48009e+06	(5)	7220529	(5)
342.169	2	10.1583	2.01571e+07	2.08868e+07	(5)	1		3.3701e+07	(5)	34037370	(5)	31675468	(5)	3.77808e+07	(5)	2.54853e+07	(5)
344.098	1	5.92942	2.28967e+06	1		3518508	(5)	2.3788e+06	(5)	2.29424e+06	(5)	1.93661e+06	(5)	1.64642e+06	(5)	3.4503e+06	(5)
345.154	1	8.64126	330296	1		375849	(5)	318373	(4)	1		319999	(5)	390700	(5)	350455	(5)
347.145	1	5.79552	573360	1		1		1427455	(5)	1.16085e+06	(4)	381416	(3)	1.06101e+06	(4)	1.50951e+06	(4)
349.233	2	9.98541	1.37169e+06	931505	(5)	1		1.64059e+06	(5)	2066781	(5)	2.21645e+06	(5)	2221417	(4)	1.68088e+06	(5)
352.211	2	8.79718	457613	1		521319	(5)	469441	(4)	492572	(3)	469500	(5)	736240	(4)	428261	(1)
354.203	1	6.00892	712089	489258	(5)	968421	(5)	1.07101e+06	(5)	566101	(5)	692957	(5)	693273	(4)	835075	(5)
356.228	2	7.12207	311013	1		391912	(4)	802614	(5)	1		365407	(5)	608160	(5)	380804	(3)
358.269	1	10.8622	5.05829e+06	1.15621e+06	(5)	5.84899e+06	(4)	11762519	(5)	752320	(5)	5.21086e+06	(5)	6.47817e+06	(5)	5.60655e+06	(5)
360.093	1	8.11103	694098	1		684373	(5)	574645	(5)	679776	(5)	549144	(5)	498630	(4)	629244	(5)
360.093	1	10.056	4.08452e+06	1		4.91429e+06	(5)	3632574	(5)	4278232	(5)	2.89537e+06	(5)	3.87169e+06	(5)	5.60896e+06	(5)
360.195	1	8.79936	2359465	1		2.14025e+06	(3)	1929171	(1)	2.25771e+06	(5)	2.31167e+06	(3)	1.86388e+06	(4)	1882553	(4)
370.161	1	7.227	821152	1		2.51022e+06	(5)	782337	(5)	717273	(5)	985038	(5)	294336	(4)	983481	(5)
372.166	1	18.8339	377275	1		443170	(4)	551288	(4)	506830	(5)	324210	(3)	405246	(5)	553920	(5)
377.142	1	4.2414	302081	1		1		1		1		201839	(4)	1		551244	(5)
377.214	2	7.46333	1.56314e+06	1		1.93572e+06	(5)	1.32974e+06	(5)	1.82563e+06	(5)	2305142	(5)	2.42782e+06	(5)	1
378.101	1	13.9111	491556	1		401198	(5)	458768	(5)	351054	(5)	273649	(5)	474552	(5)	928782	(5)
382.243	2	11.658	475573	1		1		488522	(4)	636655	(5)	482435	(3)	579734	(4)	314749	(1)
382.244	1	7.20627	1.03687e+06	323066	(1)	396342	(1)	683269	(3)	1.64916e+06	(5)	1.48445e+06	(5)	1.42403e+06	(5)	908920	(5)
383.109	1	10.7579	339522	1		350474	(4)	305437	(5)	294241	(5)	244043	(5)	364753	(5)	370452	(5)
384.259	2	10.4331	837495	338979	(1)	828218	(5)	1.31057e+06	(5)	1		884237	(5)	1.18102e+06	(5)	1.24624e+06	(5)
385.243	1	9.09273	1.10128e+06	1		867018	(5)	1		996536	(5)	1.13512e+06	(5)	828455	(5)	951500	(5)
387.27	1	7.32118	1.13754e+06	1.22856e+06	(5)	1059585	(5)	1075122	(5)	1.12613e+06	(5)	1015656	(5)	953021	(5)	987568	(5)
389.151	2	8.33288	544439	1		1		479609	(5)	778534	(5)	813408	(5)	717950	(5)	520193	(4)
392.217	1	9.63709	2925057	826566	(4)	3.28371e+06	(4)	3.75597e+06	(5)	916427	(1)	2.83299e+06	(5)	3.38979e+06	(5)	2.86018e+06	(5)
392.253	1	11.8888	2.15477e+06	3.8195e+06	(5)	2.81202e+06	(4)	2.1041e+06	(5)	2552765	(4)	2859747	(5)	1		2.38112e+06	(5)
396.212	1	9.06074	530830	1289038	(5)	397671	(5)	287082	(2)	298777	(4)	271315	(4)	1		368387	(4)
399.236	2	12.2097	4.1894e+06	2.58759e+06	(5)	1		5.54523e+06	(5)	9.70235e+06	(4)	3972391	(4)	5.28941e+06	(5)	6665548	(5)
399.259	1	8.19339	7.67348e+06	9.35461e+06	(5)	9924847	(5)	441005	(1)	1.03937e+07	(5)	9.66903e+06	(5)	3.97061e+06	(5)	9.09769e+06	(5)
399.738	2	13.9762	728673	282836	(5)	1		2.35898e+06	(5)	873999	(4)	1.04549e+06	(5)	1.14566e+06	(3)	858388	(4)
400.22	2	17.5468	485992	1		1		301968	(5)	534902	(5)	670931	(5)	575899	(5)	732315	(5)
401.178	2	15.7434	451618	265031	(2)	450308	(5)	794597	(4)	1		413484	(4)	456023	(4)	425599	(3)
401.275	1	10.8827	2.67881e+06	1		4.38346e+06	(5)	3166001	(5)	2853218	(5)	3.36766e+06	(4)	2648099	(5)	2.34194e+06	(5)
402.259	1	14.3352	1.2476e+06	747494	(5)	1512069	(5)	1810809	(5)	1		1.45218e+06	(5)	1.69821e+06	(5)	1.50413e+06	(5)
406.199	2	9.89591	2.22746e+06	1.42803e+06	(5)	1		2.74235e+06	(5)	3181633	(5)	3.39389e+06	(5)	3.47437e+06	(5)	2.93606e+06	(5)
408.248	1	10.7091	730109	1		954710	(5)	779168	(5)	881037	(5)	908336	(4)	963604	(5)	1
432.139	1	9.79242	1080682	343450	(4)	1.0696e+06	(5)	963638	(5)	730171	(5)	758302	(5)	333673	(5)	552394	(4)
413.239	1	7.14673	847181	348484	(5)	933364	(5)	283962	(3)	864128	(4)	945068	(5)	473938	(5)	1.0335e+06	(5)
415.233	1	11.8376	2.17448e+07	5.30763e+06	(5)	1		1.96581e+07	(5)	3.7578e+07	(5)	3.37545e+07	(5)	39964180	(4)	2.51321e+07	(5)
415.289	1	9.31068	593138	284135	(3)	535796	(5)	526516	(5)	976099	(3)	1		701786	(4)	743146	(3)
416.754	2	10.3373	316703	557959	(4)	335960	(4)	357703	(5)	331654	(4)	349518	(2)	1		493294	(2)
421.141	2	9.75745	417030	270510	(5)	398459	(5)	405535	(5)	328506	(5)	344366	(5)	1		272884	(5)
428.249	1	5.67507	351949	1		317952	(5)	303383	(5)	393778	(5)	1		404290	(5)	397491	(4)
431.181	1	11.5867	5060257	1		11048844	(4)	1.41461e+07	(5)	1.3108e+07	(5)	10647134	(5)	2.50688e+07	(5)	23793700	(5)
431.182	1	12.8037	775171	1		508480	(4)	2.19662e+06	(5)	409870	(4)	399162	(4)	392128	(4)	732115	(5)
431.249	1	6.56203	604136	1		667582	(5)	482519	(5)	592379	(5)	623349	(5)	645965	(5)	537944	(5)
431.264	1	12.9664	787778	640797	(5)	1.22423e+06	(5)	2.329e+06	(5)	1		964403	(5)	928394	(5)	1282399	(5)
432.244	1	5.72214	472536	311822	(5)	1		538597	(5)	528829	(5)	691141	(5)	615762	(5)	608997	(5)
433.243	1	10.994	749368	383472	(1)	395256	(1)	1		961727	(5)	577362	(1)	657624	(4)	443539	(4)
433.255	2	8.00009	3356197	1527614	(4)	2.28875e+06	(5)	3.27683e+06	(5)	4.50563e+06	(5)	5.07718e+06	(5)	5.24338e+06	(5)	1
433.756	2	8.00003	1.46559e+06	692657	(5)	951791	(5)	1310635	(5)	1.81073e+06	(5)	2.17129e+06	(5)	2126332	(4)	1
434.265	1	11.0121	1.05942e+06	744629	(5)	1.3503e+06	(4)	1		1.12621e+06	(5)	1.33336e+06	(5)	1		1.11394e+06	(5)
435.259	1	10.145	515497	459064	(5)	780506	(5)	1		623958	(4)	683424	(5)	329242	(4)	766218	(5)
435.259	1	11.4136	912786	1		847629	(3)	1.08948e+06	(5)	1.47623e+06	(5)	1.49264e+06	(5)	1959795	(3)	1.72245e+06	(5)
437.238	1	9.81844	2.51127e+06	2797236	(4)	3.09082e+06	(5)	2563859	(5)	2238742	(5)	2.55728e+06	(5)	3.01639e+06	(5)	2.6279e+06	(5)
439.217	1	9.05413	1.09593e+06	998932	(5)	1.56588e+06	(4)	3.44227e+06	(5)	1		1.35736e+06	(3)	1.4819e+06	(4)	1490091	(4)
439.265	1	8.26565	837806	268972	(2)	1.13976e+06	(5)	748125	(5)	1.09329e+06	(5)	1		973872	(4)	848653	(5)
440.127	2	9.79515	2.57125e+06	976437	(5)	2.58271e+06	(5)	2.43282e+06	(5)	1.71241e+06	(5)	1925972	(5)	848053	(5)	1.31795e+06	(5)
441.248	1	12.9538	2686132	1		1		1189031	(2)	4.43836e+06	(5)	2.88739e+06	(5)	616507	(4)	1366401	(4)
443.167	1	11.2079	784604	1		732700	(5)	896053	(5)	1.02766e+06	(5)	606005	(5)	582013	(5)	616460	(5)
443.285	1	8.5052	2.65103e+06	1.02726e+06	(4)	3.17118e+06	(5)	2.53381e+06	(5)	1		3.0459e+06	(5)	3722314	(5)	3.3589e+06	(5)
443.322	1	11.3757	5197558	5.36847e+06	(5)	7.8546e+06	(5)	4462340	(5)	4.43349e+06	(5)	5.09037e+06	(5)	5.37458e+06	(5)	5.41259e+06	(5)
445.241	1	7.265	315282	1		715895	(5)	344258	(5)	267241	(5)	386465	(5)	1		381831	(5)
445.301	1	11.7966	4.50853e+06	1.77788e+06	(5)	4.79012e+06	(5)	4.14256e+06	(5)	5.45973e+06	(5)	1.53521e+06	(5)	5.61351e+06	(5)	5.28998e+06	(5)
446.183	1	7.65923	441206	283921	(5)	628761	(5)	573386	(5)	373935	(5)	620746	(5)	391246	(5)	564347	(5)
453.233	1	7.15009	548585	1		1		460139	(5)	724754	(5)	755051	(5)	883540	(5)	595751	(5)
453.28	1	7.5149	598826	1		479377	(5)	501881	(5)	529956	(5)	756490	(5)	521246	(5)	1
456.281	1	8.12027	1.92563e+06	1		1		1.03913e+06	(5)	1.97031e+06	(5)	2.09222e+06	(5)	1770749	(5)	1329074	(5)
457.161	1	12.9877	770156	1		1.0025e+06	(5)	951674	(4)	1.33764e+06	(5)	656300	(5)	930780	(5)	1.5013e+06	(4)
459.161	1	11.1889	491887	1		560078	(5)	527699	(4)	731307	(5)	387332	(4)	468396	(5)	794497	(5)
459.176	1	14.7104	670869	1		1.48362e+06	(5)	1028843	(5)	1502435	(5)	648141	(5)	916683	(5)	2.60749e+06	(5)
459.177	1	15.1691	1.20375e+06	1		2.57724e+06	(5)	2.06766e+06	(5)	3007263	(5)	1173046	(5)	1.89825e+06	(5)	5.56571e+06	(5)
459.316	1	11.2101	1.15522e+07	8.31912e+06	(5)	1.51544e+07	(5)	3.94383e+07	(5)	1		1.33422e+07	(5)	14179561	(5)	1.5352e+07	(5)
460.204	1	3.92015	870349	1		1		1		1		693308	(1)	591461	(1)	1382209	(3)
460.746	1	10.8014	681910	1		817441	(5)	560709	(5)	941159	(5)	1		697171	(5)	711494	(5)
462.744	2	12.8327	821285	445313	(5)	979537	(5)	2068221	(5)	1		921821	(5)	1406043	(5)	1.1105e+06	(5)
463.29	1	11.9206	1.45701e+06	1.62087e+06	(5)	1		1.64487e+06	(4)	2170358	(4)	2.05724e+06	(5)	1787143	(3)	2.03321e+06	(5)
463.29	1	11.183	4.90322e+06	2745816	(5)	4.1683e+06	(4)	3737026	(1)	6.05635e+06	(5)	6.51934e+06	(5)	5418385	(4)	1
467.248	1	9.34974	337731	412071	(4)	478047	(5)	972298	(5)	1		433449	(5)	396716	(5)	496122	(5)
471.233	1	7.39703	607700	521847	(5)	765658	(5)	1		739660	(5)	746797	(5)	315458	(5)	784960	(5)
472.255	1	10.4668	905463	291718	(2)	708866	(4)	793410	(4)	911484	(3)	1.14578e+06	(5)	989022	(5)	1103482	(4)
473.156	1	12.9967	992684	1		1.15995e+06	(5)	1.22335e+06	(4)	1.3187e+06	(5)	1.0295e+06	(4)	1.1238e+06	(5)	1334637	(5)
473.177	1	12.59	1.13677e+06	1		1396030	(5)	1205925	(5)	2139588	(5)	751302	(5)	1074625	(5)	1.46021e+06	(5)
474.163	1	12.9919	1556060	1		1.89623e+06	(5)	1.74763e+06	(5)	2.30493e+06	(5)	1.39658e+06	(3)	1790095	(4)	2.42199e+06	(4)
475.171	1	12.9873	3.02525e+07	1		4.04128e+07	(5)	3.87179e+07	(5)	5.22786e+07	(5)	2.63403e+07	(5)	3.95496e+07	(5)	5.37354e+07	(5)
475.172	1	15.1735	1.02516e+06	1		1.50965e+06	(5)	1.32659e+06	(5)	1.62984e+06	(5)	882995	(5)	1139863	(5)	1.74703e+06	(5)
475.172	1	14.7129	620103	1		403287	(1)	280661	(3)	384164	(3)	233879	(3)	227353	(5)	363762	(4)
479.25	1	8.57918	2.89214e+06	1.93245e+06	(5)	3332583	(4)	3.47636e+06	(5)	3.96327e+06	(5)	4.17187e+06	(5)	4.6938e+06	(5)	1
482.218	2	10.2373	904833	569874	(5)	1		1.61388e+06	(5)	1.09911e+06	(5)	1.361e+06	(5)	994508	(5)	1.03621e+06	(5)
488.274	1	17.3051	472081	1		357380	(4)	1		408942	(5)	243067	(5)	1		1
495.279	1	9.14263	447578	413185	(5)	533999	(5)	464502	(4)	449635	(4)	522925	(5)	498100	(5)	530589	(5)
500.341	1	10.4804	441255	1		587963	(5)	487722	(4)	514687	(5)	538340	(4)	494423	(5)	389262	(3)
502.301	1	12.5269	2.2243e+06	1		2.27376e+06	(5)	2151811	(1)	2966175	(5)	2.88368e+06	(5)	2.55963e+06	(5)	2.55975e+06	(5)
502.322	1	10.3427	1.43336e+06	1.79421e+06	(5)	2.2817e+06	(5)	1		1.49635e+06	(4)	1667166	(5)	642664	(4)	2.02402e+06	(4)
506.26	2	12.7384	1049162	432284	(5)	1133496	(5)	2.12251e+06	(5)	1		1.09997e+06	(5)	1.27614e+06	(5)	1.13013e+06	(5)
511.815	2	12.509	1.10955e+06	1.49911e+06	(4)	1.00544e+06	(4)	2.03895e+06	(5)	1		1.34978e+06	(5)	1.30503e+06	(4)	1891202	(5)
514.276	1	11.1707	350790	1		435405	(5)	310966	(4)	387964	(4)	267935	(5)	414784	(5)	613320	(3)
520.275	1	8.44032	1272720	3.50361e+06	(5)	1.5051e+06	(5)	708225	(4)	1.2793e+06	(5)	1.44497e+06	(5)	1		927091	(5)
521.33	1	12.3774	314099	369286	(3)	299225	(4)	421730	(4)	455621	(3)	370500	(5)	522586	(4)	1
522.291	1	10.7947	1.29734e+06	644149	(3)	1.46413e+06	(4)	1.27837e+06	(4)	1.48299e+06	(5)	1.60974e+06	(5)	1.87946e+06	(5)	1
527.317	1	8.84668	902480	585960	(5)	1		792977	(5)	1.11403e+06	(5)	1.14258e+06	(5)	1.08077e+06	(4)	857307	(5)
533.27	1	7.87926	2717836	2.81455e+07	(5)	3.5383e+06	(5)	3.3898e+06	(5)	3.39092e+06	(5)	3.63864e+06	(5)	1		3.38507e+06	(5)
533.331	1	14.2907	393667	1		393360	(5)	348372	(5)	510263	(5)	454130	(5)	1		422409	(5)
538.265	1	11.457	674483	1.39982e+06	(5)	764782	(4)	1		905019	(5)	889293	(5)	369664	(5)	1.11198e+06	(5)
538.286	1	7.93359	351287	1		436559	(4)	1019625	(5)	1		409270	(2)	545512	(5)	449002	(4)
539.285	1	12.2523	2.02158e+07	2.17467e+07	(5)	3.36365e+07	(5)	7.13951e+07	(5)	1		2.62571e+07	(5)	3.57294e+07	(5)	2.8802e+07	(5)
542.355	1	12.0164	864588	324934	(1)	1.1271e+06	(4)	994112	(5)	1.37204e+06	(5)	1		1.60335e+06	(5)	1.16856e+06	(5)
544.369	1	13.7897	875909	820983	(4)	982441	(5)	1.15606e+06	(5)	1		985668	(5)	1.07858e+06	(5)	986402	(5)
546.273	1	12.9513	8358164	2.01671e+07	(5)	1		2.85564e+07	(5)	1.65075e+07	(5)	1.58954e+07	(5)	2.30837e+07	(5)	15287837	(5)
549.305	1	14.9246	2.85281e+06	250132	(4)	1		709763	(5)	5171044	(5)	3.30692e+06	(5)	636302	(5)	1.36322e+06	(5)
572.188	1	9.78695	1.47198e+06	311953	(5)	1.57594e+06	(5)	1.33505e+06	(5)	873900	(5)	982270	(4)	325710	(4)	639948	(5)
552.301	1	11.0998	1.33951e+06	1.16526e+06	(5)	1.72168e+06	(5)	5.04943e+06	(5)	1		1.66333e+06	(5)	1.62786e+06	(5)	1.95443e+06	(5)
553.228	1	10.1257	564489	286419	(5)	506060	(5)	506682	(5)	688214	(5)	789690	(5)	692510	(5)	1
561.19	2	9.76632	974265	454824	(4)	1000102	(5)	969079	(5)	685540	(5)	786834	(5)	378667	(5)	569804	(4)
566.364	1	10.2849	1478050	888460	(5)	1.37419e+06	(5)	1.57808e+06	(5)	1.96561e+06	(5)	2.3936e+06	(5)	1.91092e+06	(5)	1
569.364	1	10.8983	486891	424552	(4)	413082	(5)	1		404746	(4)	518533	(5)	242373	(4)	471213	(4)
570.254	1	8.38414	399886	273201	(5)	466335	(5)	526603	(5)	543692	(5)	586893	(5)	590944	(5)	1
570.791	2	9.78456	437842	1		501323	(4)	526388	(5)	296620	(5)	485781	(5)	273704	(5)	382534	(5)
572.339	1	10.2447	452849	1		1		345229	(3)	501422	(4)	617127	(5)	524311	(5)	486039	(4)
577.337	1	17.5449	2.26467e+06	412236	(5)	1		1.31326e+06	(4)	2.21223e+06	(5)	2.27722e+06	(4)	2.18458e+06	(5)	1.95167e+06	(5)
578.202	2	9.79972	484640	352903	(4)	418538	(5)	418393	(5)	407965	(5)	377630	(5)	268560	(5)	306714	(5)
578.357	1	9.18271	1.36772e+06	1286072	(5)	1.46148e+06	(5)	1.76606e+06	(5)	1414543	(5)	1603056	(5)	1.05592e+06	(5)	1.60007e+06	(5)
580.176	2	9.78875	2.56095e+06	640889	(5)	2.82603e+06	(5)	2524587	(5)	1.50539e+06	(5)	1.83689e+06	(5)	582740	(5)	1.13942e+06	(5)
580.677	2	9.78862	1257102	307392	(5)	1366219	(5)	1.22417e+06	(5)	734478	(5)	901751	(5)	278494	(5)	566330	(4)
585.273	1	18.2313	479166	498627	(5)	736441	(5)	1		646931	(5)	647532	(5)	769317	(5)	896786	(5)
586.377	1	13.3149	848917	434867	(5)	651471	(5)	915788	(4)	1.00645e+06	(5)	1.12047e+06	(5)	1.29617e+06	(4)	1
588.359	1	11.1879	448791	1		390840	(3)	298138	(5)	485502	(5)	567562	(4)	558778	(5)	1
589.794	2	11.2937	383926	870407	(5)	563819	(5)	344328	(5)	393823	(5)	483017	(5)	1		327887	(5)
597.337	1	13.1561	369577	1		602441	(4)	525453	(5)	496570	(5)	696186	(5)	739737	(5)	1
599.353	1	12.8194	2.15578e+06	1.1617e+06	(5)	1964770	(5)	2454980	(5)	3.55397e+06	(5)	1		3.21783e+06	(5)	3.62377e+06	(5)
601.369	1	13.9768	1.04412e+06	1.25624e+06	(5)	1.2147e+06	(4)	3.70578e+06	(5)	1		1.27056e+06	(5)	1.61736e+06	(5)	1.91472e+06	(5)
601.39	1	11.6019	516326	279479	(5)	748228	(4)	530671	(4)	1		670577	(4)	805240	(5)	649871	(5)
604.368	1	11.7155	553514	502222	(4)	598069	(3)	1		798716	(4)	632575	(5)	420261	(5)	839959	(5)
610.322	1	12.1552	599182	348477	(4)	1		649499	(5)	888705	(5)	872600	(5)	830409	(5)	694377	(5)
613.39	1	11.6457	564893	351330	(5)	773360	(5)	1		684335	(5)	617336	(5)	345679	(5)	689860	(5)
628.426	1	12.4694	423677	487155	(5)	519585	(5)	729652	(5)	1		582763	(5)	685875	(4)	744178	(5)
635.374	1	12.3144	1.33338e+06	590177	(5)	1.47499e+06	(5)	1.41988e+06	(5)	1.66354e+06	(5)	1.65269e+06	(5)	2.01733e+06	(5)	1
641.422	1	11.9729	6.18354e+06	3.75522e+06	(5)	5378639	(5)	7.62359e+06	(5)	9.28425e+06	(5)	9.67254e+06	(5)	1		1
647.338	1	11.7979	1.3834e+06	860961	(4)	1.95133e+06	(5)	4.54595e+06	(5)	1		1.64474e+06	(5)	1.83996e+06	(5)	1937588	(5)
652.369	1	13.6429	6.00055e+06	4.25836e+06	(4)	9.50635e+06	(5)	1.67415e+07	(5)	1		7.34851e+06	(5)	8.08431e+06	(5)	7923622	(4)
683.418	1	10.525	1.43025e+06	1		1.58108e+06	(4)	1		1438865	(5)	1.68923e+06	(5)	1		1
696.369	1	11.6859	384380	429313	(5)	326970	(3)	427708	(5)	390037	(5)	470996	(5)	319583	(4)	494430	(5)
713.348	1	11.4805	331656	1		497996	(5)	303730	(5)	439683	(5)	436863	(5)	447869	(5)	302435	(4)
728.453	1	11.6102	875123	1		816766	(5)	647266	(5)	888300	(5)	1.0361e+06	(5)	1.10006e+06	(5)	1
763.401	1	15.7389	1.81267e+06	890511	(5)	2.18734e+06	(5)	3876446	(5)	1		1.88282e+06	(5)	2.50759e+06	(5)	2.35546e+06	(5)
869.567	1	10.1908	330463	1		299871	(5)	295366	(5)	417183	(5)	457050	(5)	481136	(5)	1
966.619	1	10.1485	325308	1		267343	(5)	278741	(5)	402761	(5)	458159	(5)	456555	(5)	1
