# Supplementary figures and images for: Genome mining unearths a hybrid nonribosomal peptide synthetase-like-pteridine synthase biosynthetic gene cluster
Source: eLife journal article supplement (doi:10.7554/elife.25229), 2017-03-15

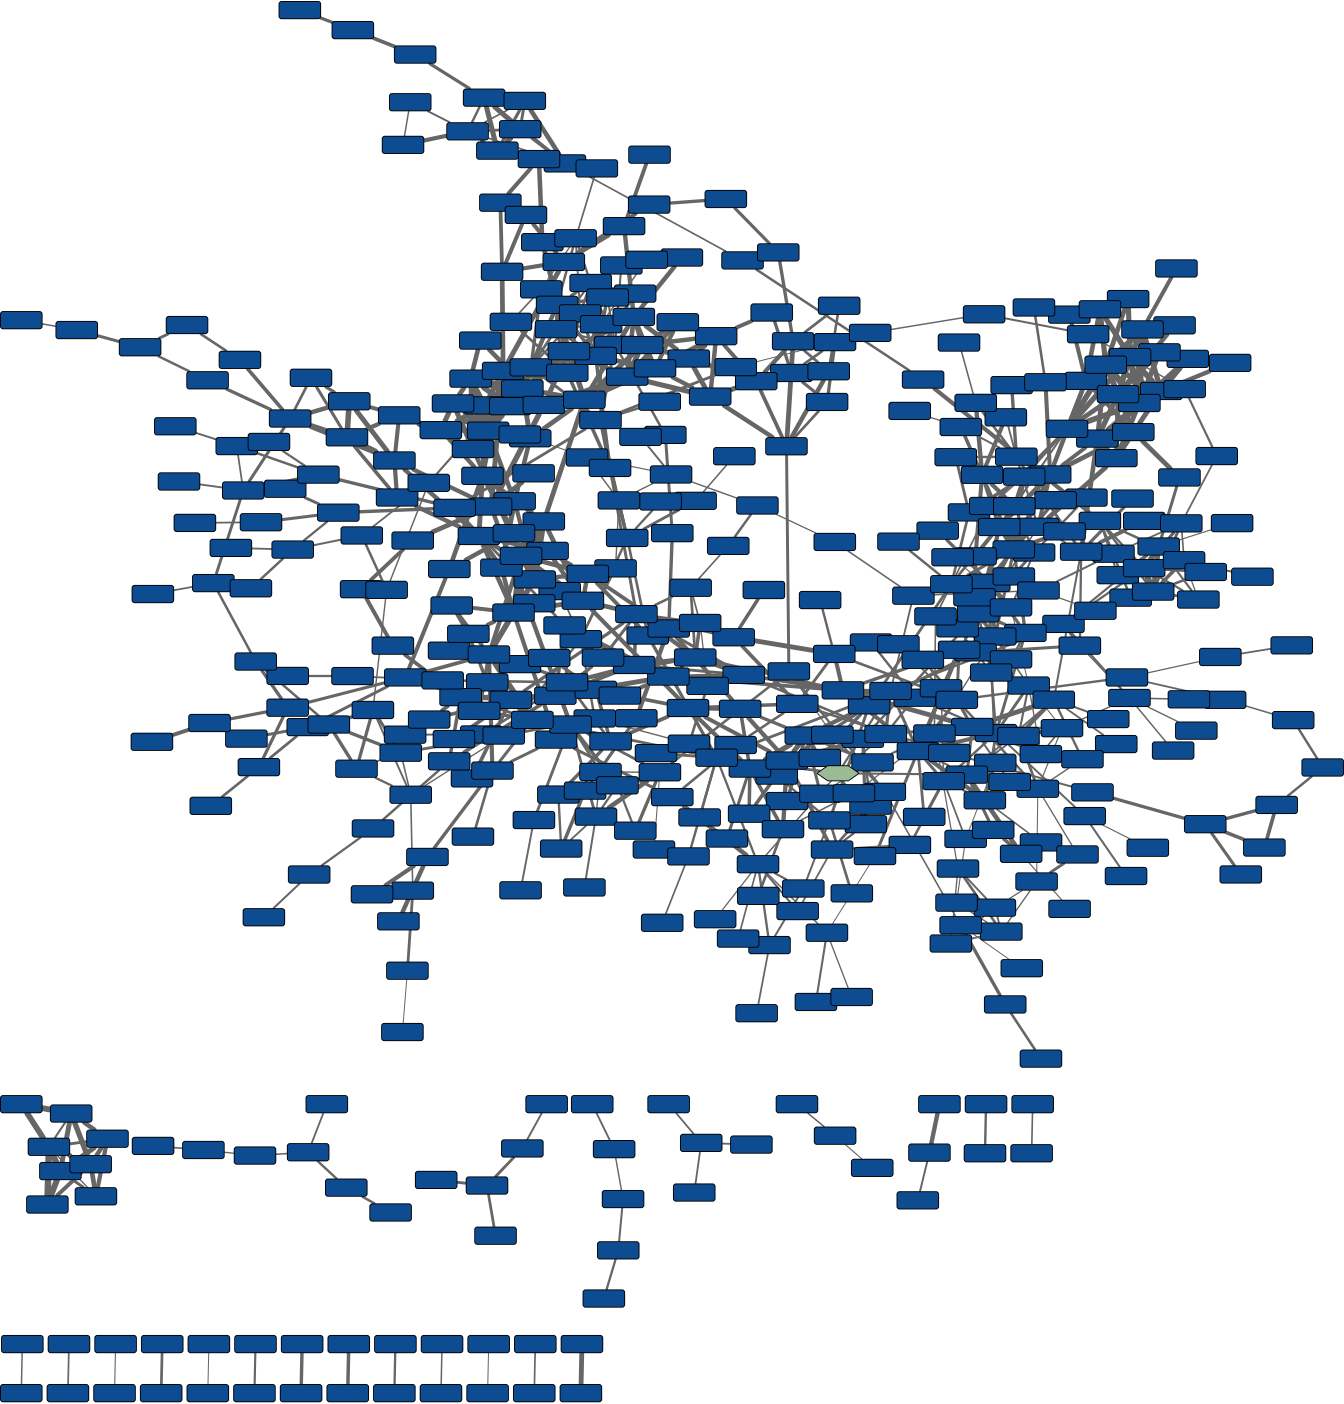

Supplement: supp [file elife-25229-supp-v1.zip]

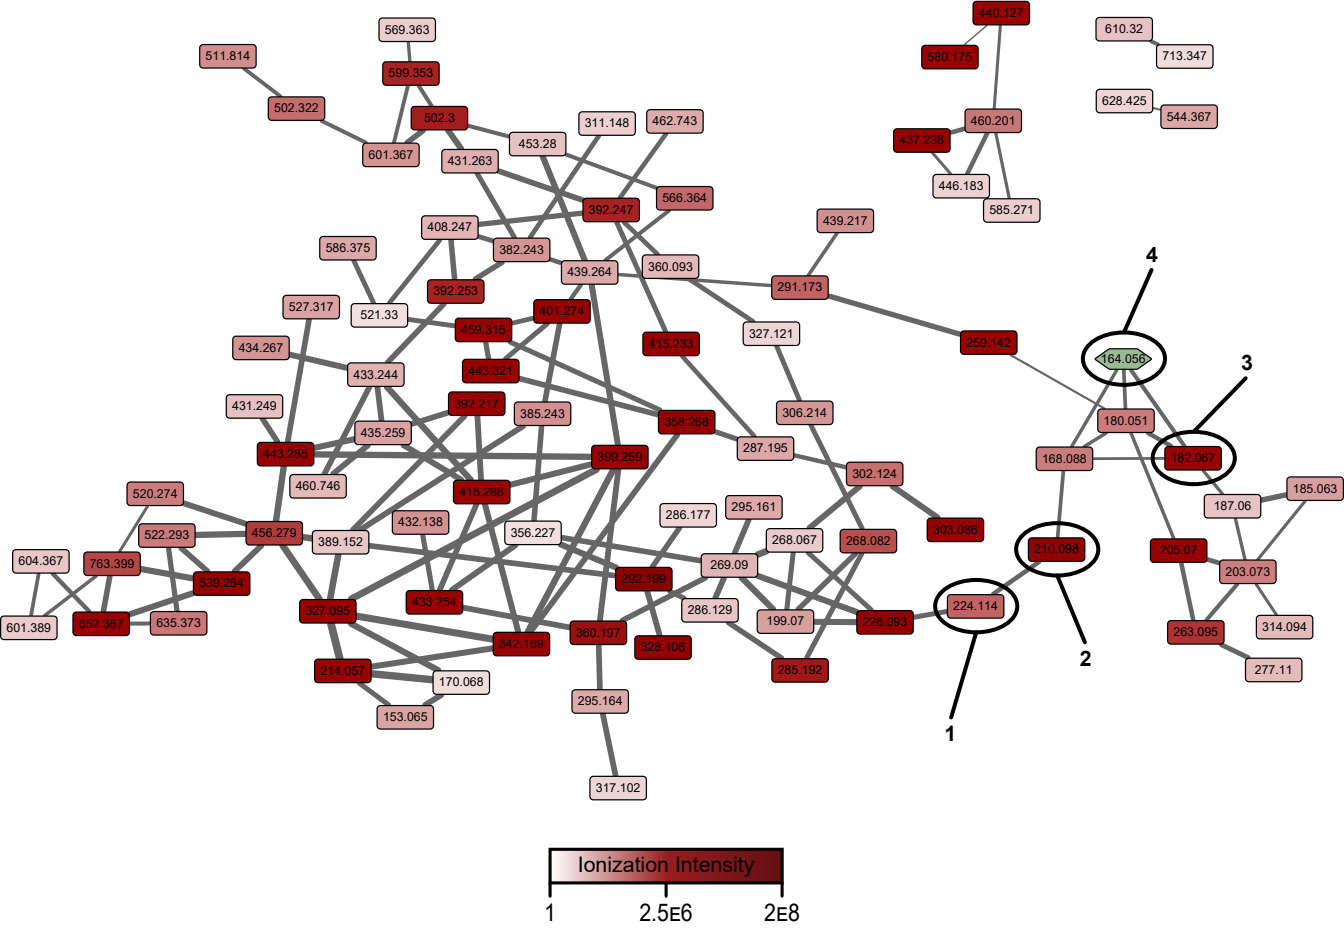

Supplement: supp [file elife-25229-supp-v1.zip]

*Photorhabdus luminescens* TT01 - chromosome PHLUTT01.1

3310209 -- 3330209

( sequence length : 5688987 bases )

*plu2793*

*plu2799*

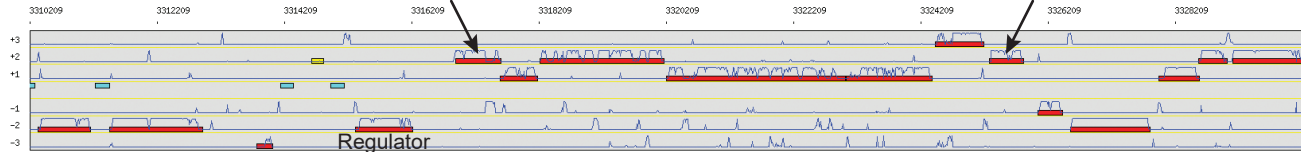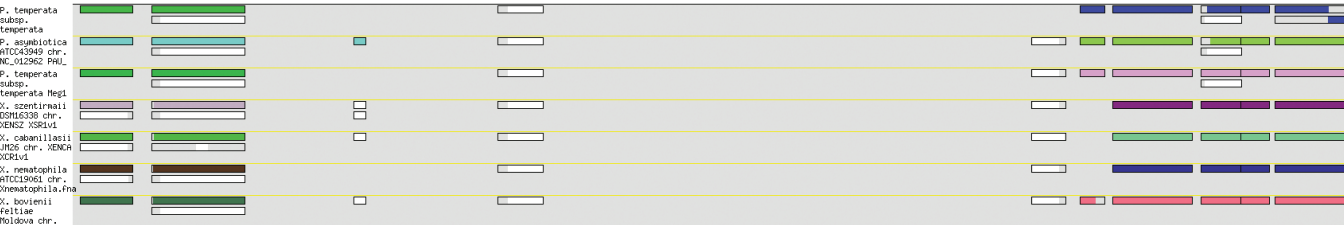

Supplement: supp [file elife-25229-supp-v1.zip]
